# Supplementary material for: The 2023 AO Spine-Praxis Guidelines in Acute Spinal Cord Injury: What Have We Learned? What Are the Critical Knowledge Gaps and Barriers to Implementation?
Source: PubMed Central journal article supplement (PMC10964887; doi:10.1177/21925682231196825), 2024-03-25
Supplement: sj-pdf-1-gsj-10.1177_21925682231196825.pdf [file sj-pdf-1-gsj-10.1177_21925682231196825.pdf]

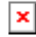

## Definition, Frequency and Risk Factors for Intra-Operative Spinal Cord Injury: A Knowledge Synthesis

|                  |                                                                                                                                                                                                                                                                                                                                                                                                                                                                                                                                                                                                                                                                                                                                                                                                                                                                                                                                                                                                                                                                                                                                                                                                                                                                                                                                                                                                                                                                                                                                                                                                                                                                                                                                    |
|------------------|------------------------------------------------------------------------------------------------------------------------------------------------------------------------------------------------------------------------------------------------------------------------------------------------------------------------------------------------------------------------------------------------------------------------------------------------------------------------------------------------------------------------------------------------------------------------------------------------------------------------------------------------------------------------------------------------------------------------------------------------------------------------------------------------------------------------------------------------------------------------------------------------------------------------------------------------------------------------------------------------------------------------------------------------------------------------------------------------------------------------------------------------------------------------------------------------------------------------------------------------------------------------------------------------------------------------------------------------------------------------------------------------------------------------------------------------------------------------------------------------------------------------------------------------------------------------------------------------------------------------------------------------------------------------------------------------------------------------------------|
| Journal:         | <i>Global Spine Journal</i>                                                                                                                                                                                                                                                                                                                                                                                                                                                                                                                                                                                                                                                                                                                                                                                                                                                                                                                                                                                                                                                                                                                                                                                                                                                                                                                                                                                                                                                                                                                                                                                                                                                                                                        |
| Manuscript ID    | Draft                                                                                                                                                                                                                                                                                                                                                                                                                                                                                                                                                                                                                                                                                                                                                                                                                                                                                                                                                                                                                                                                                                                                                                                                                                                                                                                                                                                                                                                                                                                                                                                                                                                                                                                              |
| Manuscript Type: | Special Issue- Knowledge Forum SCI Guidelines                                                                                                                                                                                                                                                                                                                                                                                                                                                                                                                                                                                                                                                                                                                                                                                                                                                                                                                                                                                                                                                                                                                                                                                                                                                                                                                                                                                                                                                                                                                                                                                                                                                                                      |
| Keywords:        | spinal cord injury, neuro, trauma                                                                                                                                                                                                                                                                                                                                                                                                                                                                                                                                                                                                                                                                                                                                                                                                                                                                                                                                                                                                                                                                                                                                                                                                                                                                                                                                                                                                                                                                                                                                                                                                                                                                                                  |
| Abstract:        | <p><b>Study Design</b><br/>Scoping review and systematic review</p> <p><b>Objectives</b><br/>Intra-operative spinal cord injury (ISCI) is a devastating complication of spine surgery. Presently, a uniform definition for ISCI does not exist. Consequently, the reported frequency of ISCI, and important risk factors vary in the existing literature. To address these gaps in knowledge, a two-part knowledge synthesis was designed.</p> <p><b>Methods</b><br/>A scoping review was conducted to review the definitions used for ISCI and ascertain the frequency of ISCI. The definition formed underwent review and voting by the Guidelines Development Group (GDG). A systematic review of the literature was conducted and reviewed by the GDG to determine the risk factors for ISCI.</p> <p><b>Results</b><br/>Frequency of ISCI ranged from 0 to 61%. Older age, male sex, hypertension, combined myelopathy, blood loss, ponte-osteotomy, coronal deformity angular ratio, and curve magnitude were, had a significant increased risk of ISCI. Better pre-operative neurological status, and use of IONM were associated with a significant decreased risk of ISCI. GDG suggested high-risk factors were, rigid thoracic curve with high deformity angular ratio, revision congenital deformity with significant cord compression and myelopathy, extrinsic intradural or extradural Lesion with cord compression and myelopathy, intramedullary tumor, unstable fractures (bilateral facet dislocation and disc herniation, extension distraction injury with ankylosing spondylitis, ossification of posterior longitudinal ligament (OPLL) with severe cord compression and moderate to severe myelopathy...</p> |

SCHOLARONE™  
Manuscripts

## ABSTRACT

### Study Design

Scoping review and systematic review.

### Objectives

Intra-operative spinal cord injury (ISCI) is a devastating complication of spine surgery. Presently, a uniform definition for ISCI does not exist. Consequently, the reported frequency of ISCI, and important risk factors vary in the existing literature. To address these gaps in knowledge, a mixed-methods knowledge synthesis was undertaken.

### Methods

A scoping review was conducted to review the definitions used for ISCI and ascertain the frequency of ISCI. The definition of ISCI underwent formal review, revision and voting by the Guidelines Development Group (GDG). A systematic review of the literature was conducted to determine the risk factors for ISCI. Based on this systematic review, a table was created to summarize the factors deemed to increase the risk for ISCI. All reviews were done according to PRISMA standards and were registered on PROSPERO.

### Results

The frequency of ISCI ranged from 0 to 61%. Older age, male sex, cardiovascular disease including hypertension, severe myelopathy, blood loss, requirement for osteotomy, coronal deformity angular ratio, and curve magnitude were associated with increased risk of ISCI. Better pre-operative neurological status, and use of IONM were associated with a decreased risk of ISCI. The risk factors for ISCI included a rigid thoracic curve with high deformity angular ratio, revision congenital deformity with significant cord compression and myelopathy, extrinsic intradural or extradural lesions with cord compression and myelopathy, intramedullary spinal cord tumor, unstable spine fractures (bilateral facet dislocation and disc herniation, extension distraction injury with ankylosing spondylitis, ossification of posterior longitudinal ligament (OPLL) with severe cord compression and moderate to severe myelopathy.

### Conclusions

1  
2  
3 ISCI has been defined as “a new or worsening neurological deficit attributable to spinal cord  
4 dysfunction during spine surgery that is diagnosed intra-operatively via neurophysiologic  
5 monitoring or by an intraoperative wake-up test, or immediately post-operatively based on  
6 clinical assessment”. This paper defines clinical and imaging factors which increase the risk for  
7 ISCI, and which could assist clinicians in decision making.  
8  
9  
10  
11  
12  
13  
14  
15  
16  
17  
18  
19  
20  
21  
22  
23  
24  
25  
26  
27  
28  
29  
30  
31  
32  
33  
34  
35  
36  
37  
38  
39  
40  
41  
42  
43  
44  
45  
46  
47  
48  
49  
50  
51  
52  
53  
54  
55  
56  
57  
58  
59  
60

For Peer Review

## INTRODUCTION

Intra-operative spinal cord injury (ISCI) is one of the most feared and devastating complications of spine surgery.<sup>1,2</sup> To date, studies have described ISCI using various definitions and diagnostic criteria; hence, the reported frequency, and risk factors of ISCI have also varied in the literature. Part of this variability in definition is attributed to the fact that some studies use findings of intra-operative neuromonitoring (IONM) to define ISCI, while others rely only on post-operative neurological examination findings. The lack of standardized definitions and diagnostic criteria for ISCI is a major challenge in finding solutions to minimize ISCI. Unifying nomenclature and developing diagnostic criteria are essential for accurately quantifying the frequency of ISCI and ascertaining the risk factors associated with it. To the authors' knowledge, there has been no systematic analysis or synthesis of the literature that defines ISCI, examines the frequency and outcomes of ISCI, delineates the role of IONM, and/or reviews the management strategies in the case of ISCI (both with and without the use of IONM). Additionally, the factors that predispose a patient to sustaining an ISCI have been poorly characterized.

To address these gaps in knowledge, a mixed-methods knowledge synthesis was undertaken. A formal systematic review was planned, and a protocol was registered on (PROSPERO CRD42022298841). The original contextual and key questions and the PICOTS (P=Population, I=Intervention, C=Comparators, O=Outcomes, T=Timing, S=Study Design) are found in Table 1. Briefly, the proposed review intended to (i) provide context regarding case definitions and diagnostic criteria of ISCI, and the use and accuracy of IONM, (ii) evaluate the risk factors for development of ISCI and (iii) address key questions related to comparative effectiveness and harms of ISCI management options and (iii). Broad scoping literature searches of published literature along with input from clinical experts from the guideline development group yielded limited substantial evidence to address the original questions or perform a full systematic review, except for the question regarding risk factors and accuracy of IONM. Given this, our original plan was revised to also incorporate scoping reviews that addressed 1) definitions, frequency, and risk factors for ISCI 2) use and accuracy of IONM for diagnosis of ISCI and 3) reported management approaches for ISCI and related harms.

This purpose of this study was to conduct a scoping and systematic review of the literature to address the following key questions:

1  
2  
3 **Contextual question:** What definitions or monitoring thresholds have been used to define and  
4 determine ISCI, and what is the reported frequency of ISCI?  
5

6  
7 **Key Question:** What are the risk factors for the development of an intra-operative spinal cord  
8 injury?  
9

## 10 11 12 13 14 **METHODS**

15  
16  
17 The contextual question on definition, and frequency of ISCI was answered by conducting a  
18 scoping review. The key question on risk factors of ISCI was addressed by conducting a  
19 systematic review. Methods used for the systematic review of ISCI risk factors were in  
20 accordance with the Agency for Healthcare Research and Quality's (AHRQ) *Methods Guide for*  
21 *Effectiveness and Comparative Effectiveness Review*.<sup>3</sup> Contextual questions were answered  
22 based on the U.S. Preventive Services Task Force methods<sup>4</sup> for contextual questions and based  
23 on citations identified via the formal literature search and gray literature.  
24  
25  
26  
27  
28  
29

### 30 **Criteria for Inclusion/Exclusion of Studies in the Review**

31  
32 The criteria for inclusion and exclusion of studies for the *systematic review of risk factors* for  
33 ISCI are specified in Table 1  
34  
35

36  
37 Study Design: Consistent with other reviews that support guideline updates, studies with the least  
38 potential for bias using a "best evidence" approach were focused on. Randomized control trials  
39 (RCTs) and high-quality prospective comparative cohort studies that controlled for confounding  
40 factors and met inclusion criteria were included as the primary evidence source. Risk factor  
41 studies that controlled for confounding were considered as the primary evidence base. In the  
42 absence of high-quality studies, lower-quality studies (e.g., case series) and narrative reviews  
43 were considered.  
44  
45  
46  
47  
48  
49

### 50 **Literature Search Strategies**

51  
52 Literature Databases: MEDLINE®, and The Cochrane Library were extensively searched. Only  
53 studies published in English were included. Figure 1 contains the terms used in the search.  
54 Citations from the search were deduplicated and dual-screened for inclusion. In addition, sources  
55  
56  
57  
58  
59  
60

1  
2  
3 of gray literature were reviewed, including professional society guidelines, selected pertinent  
4 book chapters, and other similar literature, primarily for the contextual question. Citations  
5 suggested by the clinical authors and guideline development group were compared against the a  
6 priori criteria for inclusion and exclusion. The EndNote library was searched using Key Words  
7 “risk”.  
8  
9

10  
11  
12  
13  
14 Publication Date Range: The search included citations from database inception to January 26,  
15 2022.  
16  
17

18  
19  
20 Hand Searching: Reference lists of included studies, systematic reviews, and pertinent gray  
21 literature were also evaluated for relevant studies.  
22  
23

### 24 25 26 **Process for Selecting Studies**

27 For the systematic review on risk factors of ISCI, the pre-established criteria above were used to  
28 screen citations (titles and abstracts) identified by the literature search. Any citation deemed not  
29 relevant for full-text review was reviewed by a second researcher to assure accuracy and  
30 completeness. Potentially eligible citations identified for inclusion by at least one of the  
31 reviewers were retrieved for full-text screening. Each full-text article was independently  
32 reviewed for eligibility by two team members. Any disagreements were resolved by consensus.  
33 Studies excluded after full-text review with reasons for exclusion are listed in Appendix A. For  
34 the *contextual question*, studies reporting on thresholds used to identify ISCI were selected if  
35 they reported on a minimum of three patients and satisfied the population inclusion/exclusion  
36 criteria in Table 1.  
37  
38  
39  
40  
41  
42  
43  
44  
45

### 46 **Data Abstraction and Data Management**

47  
48 After studies were selected for inclusion for the key question on risk factors, standardized data  
49 abstraction included the following (at minimum): patient characteristics (age, sex,  
50 comorbidities), completeness (American Spinal Cord Injury Association (ASIA) Impairment  
51 Score (AIS) and level of SCI, indication for spine surgery, (e.g., scoliosis, tumor), clinical/disease  
52 characteristics (e.g., myelopathy), surgical factors (e.g. approach, levels,  
53  
54  
55  
56  
57  
58  
59  
60

1  
2  
3 instrumentation), adjunctive treatments (e.g., steroids, vasopressors), and study-related  
4 characteristics (e.g., sample size, design, control of confounding, the timing of follow-up). To  
5 address the contextual question, the information on IONM definitions or thresholds and the  
6 resolution or persistence of neurological deficit was noted from the selected studies. Data was  
7 collected on how the included studies determined there was a neurological deficit. This is done  
8 using clinical neurological assessment and categorizing the degree of deficit based on a grading  
9 system. Commonly used grading systems in research and clinical practice for categorizing the  
10 severity of a neurological deficit due to SCI are ASIA grading system, McCormick grade, and  
11 Medical Research Council (MRC) grading system. Neurological deficit can also be detected by  
12 changes in IONM parameters. These include somatosensory evoked potentials (SSEP) that  
13 monitor the integrity of the dorsal column-medial lemniscal pathway, motor evoked potentials  
14 (MEP) and transcranial motor evoked potentials (TcMEP) that monitor the integrity of the  
15 corticospinal tracts, and electromyography (EMG) that describes the integrity of individual  
16 nerves.<sup>5</sup> Importantly, clinical examination and IONM are not mutually exclusive when reporting  
17 on ISCI and studies can use either or both methods to document ISCI.  
18  
19  
20  
21  
22  
23  
24  
25  
26  
27  
28  
29  
30  
31

### 32 **Assessment of Methodological Risk of Bias of Individual Studies**

33  
34 Pre-defined criteria were used to assess the risk of bias of included nonrandomized studies using  
35 the Quality in Prognosis Studies (QUIPS) tool for studies evaluating risk factors.<sup>6</sup> Two  
36 methodologists independently assessed the risk of bias. Disagreements were resolved by a  
37 discussion leading to consensus. Based on the risk of bias assessment, studies were rated as  
38 “good,” “fair” or “poor” quality based on the criteria in Table 2. The studies that described ISCI  
39 frequency were small case series and were not critically appraised. All were of poor quality.  
40  
41  
42  
43  
44  
45

### 46 **Data Synthesis**

47 The data was qualitatively summarized in tables using ranges, descriptive analysis, and  
48 interpretation of the results. Data on the frequency of ISCI were qualitatively synthesized.  
49  
50  
51  
52  
53  
54  
55  
56  
57  
58  
59  
60

Adjusted odds ratios provided by authors were reported. Clinical and methodological heterogeneity across studies precluded the pooling of studies.

### **Grading the Strength of Evidence for Major Comparisons and Outcomes**

The overall quality (strength) of evidence (SOE) was assessed based on the application of GRADE described in the AHRQ Methods Guide.<sup>3</sup> GRADE guidance related to synthesis of risk factors was used.<sup>7,8</sup> The strength of evidence was assigned an overall grade of high, moderate, low, or very low. SOE was initially evaluated by one methodologist and reviewed independently by a second for consistency and validity before the final assessment. Disagreements were resolved by consensus. For the systematic review of risk factors, studies were initially considered to be a high quality of evidence. The evidence was downgraded based on the aggregate assessment of risk of bias across studies reporting on the outcome, consistency, imprecision, directness, and publication bias. Strength of evidence was not applied to the results for the contextual question.

## **RESULTS**

Part one of the Contextual Question; What case definitions of ISCI have been used in the included studies? What criteria or thresholds for evaluation and diagnosis have been used?

### **Definition of Intra-Operative SCI**

The following definition was put forth by the Guidelines Development Group (GDG) after reviewing evidence from the scoping review, and subsequently voting and discussing it in depth, in accordance with the Delphi process<sup>9</sup>: “a new or worsening neurological deficit attributable to spinal cord dysfunction during spine surgery that is diagnosed intra-operatively via neurophysiologic monitoring, by an intraoperative wake-up test or immediately post-operatively based on clinical assessment.” Deficits can include dysfunction attributable to injury of the spinal cord, conus medullaris, or cauda equina.

However, studies provided variable definitions and thresholds for diagnosis of ISCI, which are reported in Table 3.



1  
2  
3 The search generated several studies which were grouped based on indication for surgery into  
4 those on deformity surgery, and those on tumor surgery. As seen in Table 3, the definitions in the  
5 deformity (Kato 2018,<sup>10</sup> Fehlings 2018,<sup>11</sup> Lenke 2016<sup>12</sup>) groups were centered on deterioration  
6 in lower extremity motor score (LEMS). LEMS in these studies was described using the ASIA  
7 grading system. In contrast, the tumor studies defined ISCI based on change in McCormick  
8 grade, MRC grading system, or IONM prompts (Harel 2017,<sup>13</sup> Kang 2017,<sup>14</sup> Korn 2015,<sup>15</sup>  
9 Lakomin 2017,<sup>16</sup> Sala 2006,<sup>17</sup> Skinner 2005<sup>18</sup>). Each of these aforementioned studies reported  
10 the criteria for defining an ISCI as either a change compared to preoperative LEMS/ ASIA score,  
11 a LEMS change of 5 points, change in McCormick grade or in the case of neurophysiologic  
12 monitoring, a signal that correlated with a post-operative motor deficit. Briefly, these include  
13 MEP amplitude changes > 50-80%, SSEP amplitude changes >50-60%, latency prolongation of  
14 10% or 3msec, TcMEP amplitude change >50-80%, muscle threshold >100 volts, EMG  
15 amplitude change >50%, sustained bursts/ trains, lack of waveform, or a D-wave decrease in  
16 amplitude >50%.

### 27 28 **Frequency of Intra-operative SCI**

29 For *the second part of the contextual question* on the frequency of ISCI, a total of 61 studies  
30 (N=15,376) were identified that contained information on the frequency of ISCI (Table 4).  
31 Criteria for IONM used to identify ISCI varied among studies. The most commonly employed  
32 cut-offs for amplitude drop in signal for SSEP and MEP was 50%, reported by 8 of 13 studies on  
33 deformity, 11 of 13 studies for patients with spinal tumors, 9 of 16 studies with mixed  
34 pathologies, 7 of 11 studies with cervical region pathology, all 3 studies on patients with thoracic  
35 spine pathology, and 1 of 3 studies on patient with lumbar spine pathology. Some studies also  
36 used an increase in latency of 10% in adjunct with >50% drop in SSEP or MEP to classify an  
37 IONM-based alert. Only cases of ISCI due to spine surgery were reported. Those due to post-  
38 operative compression (e.g., hematoma), root-level deficits, or arising from surgeries for  
39 pathologies not involving the spine (e.g., vascular surgeries) were not reported. Overall new  
40 deficits ranged from 0 to 61%; with increasing granularity, it was found that when the studies  
41 were divided by pathology/level of surgery, tumor surgery demonstrated a greater range of  
42 frequencies of intra-operative deficits (0-61%) compared to deformity surgery (0-17.8%), while  
43 studies with mixed pathologies reported an intermediate range of 0-9.4%. The greatest  
44 prevalence of neurological deficit was found in lumbar level surgeries (0-28.5%). Deformity-

1  
2  
3 related ISCI was more likely to resolve with up to 8% of deficits persisting, while 26.9% of  
4 tumor patients had persistent deficits. The sample sizes across studies varied from 5 to 2069, so  
5 percentages for ISCI should be interpreted cautiously.  
6  
7

### 8 9 **Risk factors for ISCI**

10  
11 From 226 citations identified via literature search, a total of six studies were identified that  
12 provided data regarding the frequency of ISCI and conducted multivariable analysis, including  
13 four studies (Fehlings 2018,<sup>11</sup> Chen 2012,<sup>19</sup> Kim 2021,<sup>20</sup> Romero-Munoz 2019<sup>21</sup>) that were  
14 recommended by clinical experts. (Figure 2). An additional surgeon consensus survey (Iyer  
15 2022)<sup>22</sup> was also considered in the literature analysis, as recommended by the Guidelines  
16 Development Group. Data abstraction from these studies is summarized in table 5 and 6.  
17  
18

19  
20 Five studies evaluated the risk of ISCI (i.e., neurological decline) in the immediate postoperative  
21 period, with four studies (Fehlings 2018,<sup>11</sup> Chen 2012,<sup>19</sup> Romero-Munoz 2019,<sup>21</sup> Zhang 2017<sup>23</sup>)  
22 using change in ASIA grade to assess neurological status and one study (Kim 2021)<sup>20</sup> using the  
23 definition of “any new limb, motor, or sensory neurological deficit”. The sixth study (Buckland  
24 2018)<sup>24</sup> evaluated risk of IONM alerts, defined as a reduction in amplitude of 50% or more in  
25 SSEPs and/or TcMEPs to signal ISCI. Results from the survey of surgeons on risk factors for  
26 ISCI was provided for context (Iyer 2022)<sup>22</sup>. Factors evaluated using multivariable analysis are  
27 found in table 7. Factors assessed using univariate level are found in table 8. Reported ISCI  
28 frequency ranged from 0.3% to 25% (7.1% to 25% in postoperative approaches and 0.3% in the  
29 study reporting on risk of IONM alert). Summary of effect estimates is summarized in table 9.  
30  
31

32  
33 Three patient population groups were identified in the included studies: those with deformity,  
34 those with various indications for spine surgery and those with degenerative disease.  
35  
36

37  
38 Evidence for risk factors for neurological deficits in patients with deformities was derived from  
39 one good-quality, prospective cohort (Fehlings 2018, N=265)<sup>11</sup> on scoliosis in adults, and one  
40 fair-quality, retrospective cohort (Zhang 2017, N=62)<sup>23</sup> in patients with congenital scoliosis  
41 (19%), kyphoscoliosis (74%), and kyphosis (7%). Another poor-quality retrospective cohort  
42 (N=2210) (Buckland 2018)<sup>24</sup> described risk factors for IONM alerts in adolescent patients with  
43 idiopathic scoliosis.  
44  
45  
46  
47  
48  
49  
50  
51  
52  
53  
54  
55  
56  
57  
58  
59  
60

1  
2  
3 Studies in patients with deformity found an increased risk of ISCI with older age, higher blood  
4 loss, surgical technique related factors like the requirement for osteotomy, and radiographic  
5 factors including coronal deformity angular ratio (DAR) and curve magnitude. For patients with  
6 “mixed” indications, one good-quality, retrospective cohort (N=316) (Chen 2012)<sup>19</sup> reported on  
7 patients with spinal degeneration (35%), tumor (23%), trauma (22%), deformity (16%), and  
8 inflammation (4%), while one fair-quality retrospective cohort (N=1282) (Romero-Munoz  
9 2019)<sup>21</sup> reported on patients with spinal degeneration (75%), deformity (18%), fractures (4%), or  
10 other rare injuries (4%). In this latter study, authors did not describe the group to which patients  
11 with ISCI were compared to. It appears that patients receiving elective surgery who experienced  
12 ISCI were compared to those with other causes of SCI. Studies enrolling patients undergoing  
13 spine surgery for a variety of indications found that older age, male sex, hypertension,  
14 depression, and a higher number of operative spinal levels were associated with ISCI.  
15  
16

17  
18 One poor quality retrospective cohort (Kim 2021)<sup>20</sup> reported on patients with degeneration and  
19 focused solely on patients with ossification of posterior longitudinal ligament (OPLL). . Two  
20 studies (Fehlings,<sup>11</sup> Chen<sup>19</sup>) were rated good, two (Zhang 2017,<sup>23</sup> Romero-Munoz 2020<sup>21</sup>) were  
21 rated fair, and two (Kim 2021,<sup>20</sup> Buckland 2019<sup>24</sup>) were rated poor quality (Table 10 ). Common  
22 methodological concerns included retrospective collection of complications (five of the six  
23 studies were retrospective study designs) and unclear or unknown study attrition. Other, less  
24 frequent concerns included inadequate description of inclusion/exclusion criteria and unclear  
25 validity and/or reliability of the measurement methods for prognostic factors and/or confounders.  
26 For the studies where the indication for surgery was degeneration, male sex, obesity, CCI,  
27 combined myelopathy, a higher number of operative spinal levels and increased time of surgery  
28 were associated with ISCI.  
29  
30

### 31 32 33 34 35 36 37 38 39 40 41 42 43 44 **Patient Specific Risk Factors for ISCI**

45  
46 Five studies reported on age as a risk factor for ISCI (Fehlings 2018,<sup>11</sup> Romero Munoz 2019,<sup>21</sup>  
47 Zhang 2017,<sup>23</sup> Chen 2012,<sup>19</sup> Kim 2021<sup>20</sup>). Four studies reported increased risk of ISCI with  
48 increased age (Fehlings 2018,<sup>11</sup> Romero Munoz 2019,<sup>21</sup> Zhang 2018<sup>23</sup>, Chen 2012<sup>19</sup>). Two of  
49 these studies reported this as a significant association (Zhang 2017,<sup>23</sup> Chen 2012<sup>19</sup>), while in the  
50 other two studies the association was not significant (Fehlings 2018,<sup>11</sup> Romero Munoz 2019<sup>21</sup>).  
51 In one study a slightly decreased risk of ISCI was associated with increased age (OR=0.97), that  
52  
53  
54  
55  
56  
57  
58  
59  
60

1  
2  
3 was not significant ( $p>0.05$ ) (Kim 2021<sup>20</sup>). Male sex was associated with increased risk of ISCI  
4 in two studies. The association was significant in one study, while not significant in the other  
5 (Chen 2012, <sup>19</sup> Kim<sup>20</sup>). Hypertension was associated with a significant increased risk of ISCI in  
6 one study, and a non-significant increased risk of ISCI in another study (Chen 2012, <sup>19</sup> Romero  
7 Munoz 2019<sup>21</sup>). Diabetes Mellitus was associated with a non-significant decreased risk of ISCI in  
8 one study (Romero Munoz 2019<sup>21</sup>). Obesity was associated with an increased but non-significant  
9 risk of ISCI in one study (Romero Munoz 2019<sup>21</sup>). Another study reported a non-significant  
10 increased risk of ISCI with increasing body mass index (BMI) (Kim<sup>20</sup>). Clinical depression was  
11 associated with a non-significant increased risk of ISCI (Romero Munoz 2019<sup>21</sup>). Charleston  
12 Comorbidity Index (CCI) was also associated with a non-significant increased risk of ISCI  
13 (Kim<sup>20</sup>). Dyslipidemia has a non-significant association with decreased risk of ISCI in one study  
14 (Romero Munoz 2019<sup>21</sup>). Worse pulmonary function was reported to have increased risk of ISCI  
15 in one study that was non-significant (Zhang 2017<sup>23</sup>).  
16  
17  
18  
19  
20  
21  
22  
23  
24  
25

### 26 **Clinical Risk Factors for ISCI**

27  
28 Pre-operative neurological status was reported as a risk factor in two studies (Chen 2012<sup>19</sup>,  
29 Zhang 2017<sup>23</sup>). In one study a better pre-operative neurological status was associated with a  
30 significantly decreased risk of ISCI (Chen 2012<sup>19</sup>). In a second study, the association was not  
31 significant, although it was associated with a decreased risk (Zhang 2017<sup>23</sup>). Combined  
32 myelopathy was associated with a significant increased risk of ISCI in one study (Kim 2021<sup>20</sup>).  
33  
34  
35  
36  
37  
38 Blood loss was associated with an increased risk of ISCI in two studies (Fehlings 2018<sup>11</sup>, Zhang  
39 2017<sup>23</sup>). The association was significant in one study, and non-significant in the other (Zhang  
40 2017<sup>23</sup>, Fehlings 2018<sup>11</sup>). In a third study, blood loss had equivocal ( $OR=1$ ) association with  
41 ISCI that was not significant (Kim 2021<sup>20</sup>).  
42  
43  
44  
45

### 46 **Surgical Risk Factors for ISCI**

47  
48 A higher number of spinal levels was associated with increased risk of ISCI in two studies and  
49 with a decreased risk in one study. The increased risk was significant in one study and non-  
50 significant in the second study. The decreased risk was non-significant (Fehlings 2018,<sup>11</sup> Kim  
51 2021<sup>20</sup>, Chen 2012<sup>19</sup>). Increasing operation time was associated with increased risk of ISCI,  
52 however this was not significant (Kim 2021<sup>20</sup>). Lumbar level osteotomy was associated with a  
53  
54  
55  
56  
57  
58  
59  
60

1  
2  
3 significant increased risk of ISCI. In the same study prevalence of three level osteotomy had a  
4 non-significant increased risk of ISCI (Fehlings 2018<sup>11</sup>). In another study, Ponte-osteotomy was  
5 associated with a significant increased risk of ISCI (Buckland 2018<sup>24</sup>). Use of IONM was  
6 associated with a significant decreased risk of ISCI in one study (Kim 2021<sup>20</sup>).  
7  
8  
9

### 10 **Radiological Risk Factors ISCI**

11  
12  
13 One study (Fehlings 2018)<sup>11</sup> on patients with scoliosis reported a greater odds of postoperative  
14 neurological deficit per 1 unit increase of coronal deformity angular ratio (DAR). One study  
15 (Buckland 2018)<sup>24</sup> in patients with adolescent scoliosis found a significant positive association  
16 between spinal curve magnitude and IONM alerts but did not report an effect estimate.  
17  
18  
19

20  
21 In addition to risk factors identified in the systematic review, GDG proposed seven  
22 characteristics of high-risk patients for ISCI. These included rigid thoracic curve with high  
23 deformity angular ratio, revision congenital Deformity with significant cord compression and  
24 myelopathy, extrinsic intradural or extradural Lesion with cord compression and myelopathy,  
25 intramedullary tumor, unstable fractures (bilateral facet dislocation and disc herniation, extension  
26 distraction injury with ankylosing spondylitis, ossification of posterior longitudinal ligament  
27 (OPLL) with severe cord compression and moderate to severe myelopathy. These risk factors  
28 were thoroughly discussed and voted upon by the GDG. Eventually, these risk factors were  
29 accepted as high risk after a unanimous vote according to the Delphi Process.  
30  
31  
32  
33  
34  
35  
36

### 37 **Quality (Strength) of Evidence**

38  
39 The overall quality (strength) of evidence for risk factors for ISCI based on multivariate analyses  
40 was low or very low for most factors across surgical conditions. (Table 10). Increased odds for  
41 ISCI varied by surgical indication/population (e.g., deformity). In patients undergoing surgery  
42 for spinal deformity, there was moderate evidence of increased odds for ISCI in patients with  
43 increasing age and increasing coronal DAR. There was moderate evidence that estimated blood  
44 loss and the number of spinal levels were not associated with increased odds of ISCI in the same  
45 population. There was moderate evidence that better preoperative AIS was associated with  
46 decreased odds of ISCI in a mixed population.  
47  
48  
49  
50  
51  
52  
53  
54  
55  
56  
57  
58  
59  
60

## Consensus Summary of Risk Factors for Intraoperative Spinal Cord Injury

Based on the knowledge synthesis summarized above and a consensus-based Delphi approach with the Guideline Development Group, a proposed list of risk factors for ISCIS was defined (Table 11).

## DISCUSSION

The study of ISCI has been limited to date. Consequently, prior to this Focus issue, a paucity of evidence exists to guide clinicians in the decision-making surrounding patients who sustain an ISCI. This article has sought to identify the definition, frequency, risk factors, and management of ISCI through a scoping and systematic review of the existing literature.

### Definition of ISCI:

To define ISCI a scoping review was conducted in which studies were reviewed and divided into two groups based on whether they focused on deformity or tumor surgery. Three studies by Lenke et al.,<sup>12</sup> Fehlings et al.<sup>11</sup> and Kato et al.<sup>10</sup> were centered around outcomes after adult deformity surgery. These outcomes were reported with respect to LEMS, where a major decline was defined as a loss of >5 points as this correlated to a deficit in 3 or more myotomes for 90% of the major decline group.<sup>10</sup> The aforementioned deficits were assessed at various time points postoperatively and therefore represent outcomes as a result of surgery rather than the natural history of the disease. The ASIA assessment is based on scoring of each key myotome from 0-5 on the MRC scale. The LEMS is the sum of all myotomes in the lower extremities bilaterally – this has been shown to correlate with ambulatory ability.<sup>11</sup>

Within tumor-based surgery, six studies provided definitions of ISCI. Each of these studies aimed to demonstrate the role of IONM in spinal cord tumor resection surgery. The definition of ISCI varied from a decrease in McCormick grade, MRC grade or neuromonitoring signal changes, with periods of assessment ranging from immediately postoperatively to outpatient follow up. The McCormick grade defines a patient's neurological impairment based on motor and sensory symptoms and functional status. This was used by Harel,<sup>13</sup> Korn<sup>15</sup> and Sala<sup>17</sup> to define ISCI resulting from spinal tumor resection surgery. Overall, the definition “a new or



worsening neurological deficit attributable to spinal cord dysfunction during spine surgery that is diagnosed intra-operatively via neurophysiologic monitoring or immediately post-operatively based on clinical assessment” settled on for the purposes of this review is based on a combination of the studies included in this review and GDG recommendations. This definition encompasses both the role of IONM, and the clinical impact on the patient. The true impact of an ISCI is dependent on how the SCI affects the patient clinically; therefore, while the definition of ISCI relates to changes in neuromonitoring, further investigation is required to determine how IONM signals translate to clinical findings. Additionally, the review identified the most commonly used threshold for IONM indicative of ISCI as loss of 50% or more signal on IONM. The above-mentioned definition was reviewed by the GDG in the context of evidence collected from the scoping review. Changes were proposed and voted upon, in accordance with the Delphi Process. The use of wake-up test to detect ISCI was added to the definition as it was proposed that IONM is not readily available across the globe. This change was upheld after the voting process.

Based on the knowledge synthesis and a Delphi-based approach with the Guidelines Development Group, the following definition of Intraoperative Spinal Cord Injury was proposed:

“a new or worsening neurological deficit attributable to spinal cord dysfunction during spine surgery that is diagnosed intra-operatively via neurophysiologic monitoring or via wake-up test, or immediately post-operatively based on clinical assessment”.

### **Frequency of ISCI:**

The frequency of ISCI varied across pathology and spinal level, as seen in Table 3. The data from this review suggested that the frequency of ISCI may be greater in tumor surgery with a range of 0-61% and persistent deficits up to 27%.<sup>16</sup> Of the 13 studies reporting on tumor surgery and IONM, one reported exclusively on extradural tumors (frequency of 1.97% with post-operative deficits), three on intradural extramedullary tumors (up to 16.5% with post-operative deficits), five on intramedullary tumors (up to 71.4% with ISCI) and the remainder on tumors in varied locations. This higher frequency of ISCI could be due in part to pre-existing deficits resulting from tumors within or abutting the cord.<sup>25 23,26</sup>

### **Risk Factors of ISCI**

1  
2  
3 The most commonly reported risk factors identified in this systematic review included older age,  
4 male sex, hypertension, pre-operative neurological status, blood loss, higher BMI, and number of  
5 spinal levels operated on. Older age, male sex, hypertension, combined myelopathy, blood loss,  
6 ponte-osteotomy, DAR, and curve magnitude were identified as factors with a statistically  
7 significant increased risk of ISCI. A better pre-operative neurological status, and use of IONM  
8 were identified as factors associated with a significant decreased risk of ISCI.  
9  
10  
11  
12  
13

14 One of the most commonly cited risk factors was a decreased preoperative neurological status  
15 that can be considered evidence of preoperative spinal cord dysfunction.<sup>21</sup> This can be attributed  
16 to the fact that a damaged cord is considered more vulnerable (or potentially “with less reserve”)  
17 to further insult.<sup>19</sup> Furthermore, it is possible that tumors result in intrinsic cord damage and that  
18 patients undergoing surgical resection may have more deficits preoperatively. These preoperative  
19 deficits may therefore increase the risk of ISCI as the spinal cord may be more susceptible to  
20 ischemia (on top of the obvious fact that the surgical approach often requires dissection through  
21 parts of the spinal cord that may be unaffected preoperatively).  
22  
23  
24  
25  
26  
27

28 The frequency of deficits differed by spinal level, with the lumbar spine representing the greatest  
29 frequency of ISCI. Some literature has suggested that the sparse blood supply in the  
30 thoracolumbar region may contribute to the relatively increased risk of ischemia and subsequent  
31 increased frequency of ISCI in this region.<sup>26</sup> Importantly, while the lumbar region has the highest  
32 reported frequency of ISCI, studies have identified a potential for injury to the cord during  
33 surgery at all spinal levels. Additionally, while injury at a lumbar spinal level may not, in the  
34 strictest definition, mean injury to the lumbar spinal cord but rather to the cauda equina (i.e.,  
35 nerve root injury), for the purpose of this review, it was considered as ISCI as the etiology of the  
36 injury was still iatrogenic during spine surgery.  
37  
38  
39  
40  
41  
42  
43  
44

45 Several mechanisms have been suggested to describe the etiology of ISCI. Studies have proposed  
46 that injury is the result of direct mechanical trauma to the cord or from spinal cord ischemia.<sup>27,28</sup>  
47 Mechanical trauma can result from the placement of instrumentation or compression from  
48 surrounding structures such as the ligamentum flavum or the intervertebral disc. Vitale et al also  
49 discussed the implications of ischemia on ISCI and demonstrated that those with  
50 cardiopulmonary comorbidities were more likely to sustain ISCI as detected by IONM. This  
51 finding was not reported by the studies assessed in our scoping review – however, blood loss was  
52  
53  
54  
55  
56  
57  
58  
59  
60



1  
2  
3 described as a risk factor for ISCI in two studies and may potentially be a surrogate for cord  
4 perfusion.<sup>28</sup> Additionally, Zhang et al showed that pulmonary function had an increased risk of  
5 ISCI (although not significant).<sup>23</sup>  
6  
7

8  
9 Older age was also reported as a risk factor for ISCI, presumably due to both the increased  
10 likelihood of postoperative complications and because of decreased neural tissue resilience with  
11 age.<sup>19</sup> Depression and Charleston Comorbidity Index was associated with an increased, but non-  
12 significant risk of ISCI. Hypertension showed a positive association with ISCI in one study but  
13 not another. As such, while this scoping review has identified several risk factors of ISCI, there  
14 was not enough evidence to establish the association between patients, surgical and disease  
15 characteristics and risk of ISCI. Further, it is not feasible to interpret age and co-morbidities in  
16 isolation as risk factors of ISCI, as these factors are related to each other. In future studies,  
17 authors should evaluate the association of frailty and risk of ISCI, as frailty index includes age  
18 and co-morbidities and can serve as a more comprehensive parameter.  
19  
20  
21  
22  
23  
24  
25

26  
27 Importantly, Kim et al reported a significant negative association between ISCI and the use of  
28 IONM (OR 0.14,  $p=0.003$ ).<sup>20</sup> Specifically, this finding indicates that when IONM was used  
29 during surgery, the risk of ISCI was significantly decreased. Use of IONM is a modifiable factor  
30 unlike many other factors such as age and co-morbidities. IONM can detect ISCI in real time  
31 during surgery, which can notify the surgical team to take actions to minimize or even reverse  
32 the deficit when still possible.<sup>23</sup>  
33  
34  
35  
36  
37

38 The curve magnitude and DAR ratios were identified as important risk factors for ISCI. More  
39 significant deformity can result in kinking or stretching of the cord and alter its hemodynamic  
40 supply.<sup>23</sup> These surgeries are naturally associated with a higher risk of ISCI due to direct  
41 manipulation of the neural elements, acute change in spinal canal alignment, the use of extensive  
42 spinal instrumentation and vascular insufficiency from stretch of the anterior spinal artery or  
43 over-shortening of the spinal column<sup>1,2,13</sup> Male sex was also shown to be a risk factor by three of  
44 the included studies. Chen et al attributed this to a potential protective effect of estrogen and  
45 progesterone in female patients.<sup>19</sup> Not all studies, however, reported a statistically significant  
46 association between sex and ISCI.  
47  
48  
49  
50  
51  
52  
53

54 There are several limitations to this knowledge synthesis. Firstly, the majority of the studies  
55 available on this topic were rated as low quality. As there was previously no single definition,  
56  
57  
58  
59  
60

1  
2  
3 method, or criteria to define ISCI, there is variation in the reported frequency and risk factors of  
4 ISCI. Further, it is possible that not all included studied documented neurological score  
5 preoperatively using standard grading methods. There are also several strengths to our review. It  
6 is the first comprehensive and systematic knowledge synthesis that evaluates the frequency and  
7 risk factors of ISCI and provides a uniform definition. The methods used to conduct the  
8 knowledge synthesis were rigorous and abided by current standards. Additionally, the quality of  
9 the studies included was ascertained and reported. Specifically, the definition was thoroughly  
10 reviewed, debated, and voted upon by the GDG after the scoping review, and was formed after a  
11 unanimous vote, following the Delphi Process.  
12  
13  
14  
15  
16  
17  
18

19 In summary, a comprehensive definition of ISCI was provided using the evidence gathered in  
20 this knowledge synthesis and input from GDG. This standardization of nomenclature for ISCI  
21 will enable future studies to better quantify the incidence of major neurological deficits, identify  
22 relevant risk factors and assess treatment protocols for ISCI management. Furthermore, by  
23 combining the results on risk factors with the frequency data, and recommendations by GDG,  
24 this review identified a subset of patients at “higher risk” for ISCI. These patients include older  
25 patients, those with high grade tumors causing compression, severe rigid deformity requiring  
26 multiple osteotomies, or structural pathologies causing myelopathy (e.g., OPLL) and those  
27 undergoing revision surgery.  
28  
29  
30  
31  
32  
33  
34

35 While, in theory, the risk of ISCI can never be eliminated there can be strategies developed to  
36 mitigate and minimize it. This further raises the question of the role of IONM, management  
37 strategies in the event of loss on IONM, and a potential care pathway to mitigate the adverse  
38 event.  
39  
40  
41  
42

## 43 **CONCLUSION**

44

45 After a comprehensive scoping review, and expert opinion input, a consensus-based definition  
46 for ISCI was developed. It has been identified that most studied have reported that a decrease of  
47 50% or more on IONM parameter can be considered indicative of ISCI. Additionally, several  
48 clinical, surgical, and radiological risk factors for ISCI have been identified. The results  
49 synthesized in this manuscript will supplement clinicians’ knowledge of frequency and risk  
50 factors for ISCI in order to inform decision making regarding prevention and management  
51  
52  
53  
54  
55  
56  
57  
58  
59  
60

1  
2  
3 strategies. A uniform, consensus-based definition of ISCI will also aid in optimizing future  
4 research on this topic. Additionally, this review further raises the question of the role of IONM,  
5 management strategies in the event of an IONM alert, and a potential care pathway to manage  
6 ISCI.  
7  
8  
9  
10  
11  
12  
13  
14  
15  
16  
17  
18

## 19 **FIGURE LEGENDS**

20  
21 **Figure 1: Search Strategy.**

22  
23  
24 **Figure 2: Literature search and study selection flow diagram for the systematic review on risk**  
25 **factors of ISCI.**  
26  
27  
28  
29  
30  
31  
32  
33  
34  
35  
36  
37  
38  
39  
40  
41  
42  
43  
44  
45  
46  
47  
48  
49  
50  
51  
52  
53  
54  
55  
56  
57  
58  
59  
60

## REFERENCES

1. Daniels AH, Hart RA, Hilibrand AS, et al. Iatrogenic Spinal Cord Injury Resulting From Cervical Spine Surgery. *Global Spine J.* 2017;7(1 Suppl):84S - 90S.
2. Ahn H, Fehlings MG. Prevention, identification, and treatment of perioperative spinal cord injury. *Neurosurg Focus.* 2008;25(5):E15.
3. Methods guide for effectiveness and Comparative Effectiveness Reviews. Accessed October 27, 2022. <https://effectivehealthcare.ahrq.gov/products/collections/cer-methods-guide>
4. Procedure manual. Accessed October 3, 2022. <https://www.uspreventiveservicestaskforce.org/uspstf/about-uspstf/methods-and-processes/procedure-manual>
5. Ghatol D, Widrich J. *Intraoperative Neurophysiological Monitoring*. StatPearls Publishing; 2022.
6. Hayden JA, van der Windt DA, Cartwright JL, Côté P, Bombardier C. Assessing bias in studies of prognostic factors. *Ann Intern Med.* 2013;158(4):280-286.
7. Iorio A, Spencer FA, Falavigna M, et al. Use of GRADE for assessment of evidence about prognosis: rating confidence in estimates of event rates in broad categories of patients. *BMJ.* 2015;350:h870.
8. Foroutan F, Guyatt G, Zuk V, et al. GRADE Guidelines 28: Use of GRADE for the assessment of evidence about prognostic factors: rating certainty in identification of groups of patients with different absolute risks. *J Clin Epidemiol.* 2020;121:62-70.
9. Dalkey N, Helmer O. An Experimental Application of the DELPHI Method to the Use of Experts. *Manage Sci.* 1963;9(3):458-467.
10. Kato S, Fehlings MG, Lewis SJ, et al. An Analysis of the Incidence and Outcomes of Major Versus Minor Neurological Decline After Complex Adult Spinal Deformity Surgery: A Subanalysis of Scolio-RISK-1 Study. *Spine.* 2018;43(13):905-912.
11. Fehlings MG, Kato S, Lenke LG, et al. Incidence and risk factors of postoperative neurologic decline after complex adult spinal deformity surgery: results of the Scolio-RISK-1 study. *Spine J.* 2018;18(10):1733-1740.
12. Lenke LG, Fehlings MG, Shaffrey CI, et al. Neurologic Outcomes of Complex Adult Spinal Deformity Surgery: Results of the Prospective, Multicenter Scolio-RISK-1 Study. *Spine.* 2016;41(3):204-212.
13. Harel R, Schleifer D, Appel S, Attia M, Cohen ZR, Knoller N. Spinal intradural extramedullary tumors: the value of intraoperative neurophysiologic monitoring on surgical outcome. *Neurosurg Rev.* 2017;40(4):613-619.
14. Kang H, Gwak HS, Shin SH, et al. Monitoring rate and predictability of intraoperative monitoring in patients with intradural extramedullary and epidural metastatic spinal tumors. *Spinal Cord.* 2017;55(10):906-910.

15. Korn A, Halevi D, Lidar Z, Biron T, Ekstein P, Constantini S. Intraoperative neurophysiological monitoring during resection of intradural extramedullary spinal cord tumors: experience with 100 cases. *Acta Neurochir* . 2015;157(5):819-830.
16. Lakomkin N, Mistry AM, Zuckerman SL, et al. Utility of Intraoperative Monitoring in the Resection of Spinal Cord Tumors: An Analysis by Tumor Location and Anatomical Region. *Spine* . 2018;43(4):287-294.
17. Sala F, Palandri G, Basso E, et al. Motor evoked potential monitoring improves outcome after surgery for intramedullary spinal cord tumors: a historical control study. *Neurosurgery*. 2006;58(6):1129-1143; discussion 1129-1143.
18. Skinner SA, Nagib M, Bergman TA, Maxwell RE, Msangi G. The initial use of free-running electromyography to detect early motor tract injury during resection of intramedullary spinal cord lesions. *Neurosurgery*. 2005;56(2 Suppl):299-314; discussion 299-314.
19. Chen Q, Li F, Wu W. Risk factors of iatrogenic spinal cord injury in spinal surgery: a multicenter retrospective study. *Int J Neurosci*. 2012;122(10):606-610.
20. Kim JE, Kim JS, Yang S, et al. Neurophysiological monitoring during anterior cervical discectomy and fusion for ossification of the posterior longitudinal ligament. *Clin Neurophysiol Pract*. 2021;6:56-62.
21. Romero-Muñoz LM, Segura-Fragoso A, Talavera-Díaz F, Guimbard-Pérez J, Caba-Mora D, Barriga-Martín A. Neurological injury as a complication of spinal surgery: incidence, risk factors, and prognosis. *Spinal Cord*. 2020;58(3):318-323. doi:10.1038/s41393-019-0367-0
22. Iyer RR, Vitale MG, Fano AN, et al. Establishing consensus: determinants of high-risk and preventative strategies for neurological events in complex spinal deformity surgery. *Spine Deform*. 2022;10(4):733-744.
23. Zhang BB, Zhang T, Tao HR, et al. Neurological complications of thoracic posterior vertebral column resection for severe congenital spinal deformities. *Eur Spine J*. 2017;26(7):1871-1877.
24. Buckland AJ, Moon JY, Betz RR, et al. Ponte Osteotomies Increase the Risk of Neuromonitoring Alerts in Adolescent Idiopathic Scoliosis Correction Surgery. *Spine* . 2019;44(3):E175-E180.
25. Kumar N, Tan WLB, Wei W, Vellayappan BA. An overview of the tumors affecting the spine-inside to out. *Neurooncol Pract*. 2020;7(Suppl 1):i10-i17.
26. Cramer DE, Maher PC, Pettigrew DB, Kuntz C 4th. Major neurologic deficit immediately after adult spinal surgery: incidence and etiology over 10 years at a single training institution. *J Spinal Disord Tech*. 2009;22(8):565-570.
27. Bridwell KH, Lenke LG, Baldus C, Blanke K. Major intraoperative neurologic deficits in pediatric and adult spinal deformity patients. Incidence and etiology at one institution. *Spine* . 1998;23(3):324-331.
28. Vitale MG, Moore DW, Matsumoto H, et al. Risk factors for spinal cord injury during surgery for spinal deformity. *J Bone Joint Surg Am*. 2010;92(1):64-71.

|    |                                                                                                                                                                                                                                                                                                                                           |
|----|-------------------------------------------------------------------------------------------------------------------------------------------------------------------------------------------------------------------------------------------------------------------------------------------------------------------------------------------|
| #1 | "Spinal Injuries"[Mesh] OR "Spinal Diseases"[Mesh] OR "Spinal Cord Compression"[Mesh] OR "Spinal Cord Injuries"[Mesh] OR "Spinal Cord Neoplasms"[Mesh] OR "Spinal Cord Ischemia"[Mesh] OR "Osteoarthritis, Spine"[Mesh] OR "Radiculopathy"[Mesh] OR "myelopathy" OR "Cauda Equina Syndrome"[Mesh] OR "cauda equina" OR "conus medullaris" |
| #2 | "Iatrogenic Disease"[Mesh] OR "Intraoperative Complications"[Mesh] OR "Postoperative Complications"[Mesh]                                                                                                                                                                                                                                 |
| #3 | "Aorta, Abdominal"[Mesh] OR "Vascular Surgical Procedures"[Mesh] OR "Stroke"[Mesh] OR "aortic aneurysm"                                                                                                                                                                                                                                   |
| #4 | "Aorta, Abdominal"[Mesh] OR "Vascular Surgical Procedures"[Mesh] OR "Stroke"[Mesh] OR "aortic aneurysm" OR hematoma OR abscess OR palsy                                                                                                                                                                                                   |
| #5 | (#1 AND #2) NOT #4: LIMIT ABSTRACT, HUMANS, ENGLISH                                                                                                                                                                                                                                                                                       |

Figure 1: Search Strategy.

697x258mm (38 x 38 DPI)

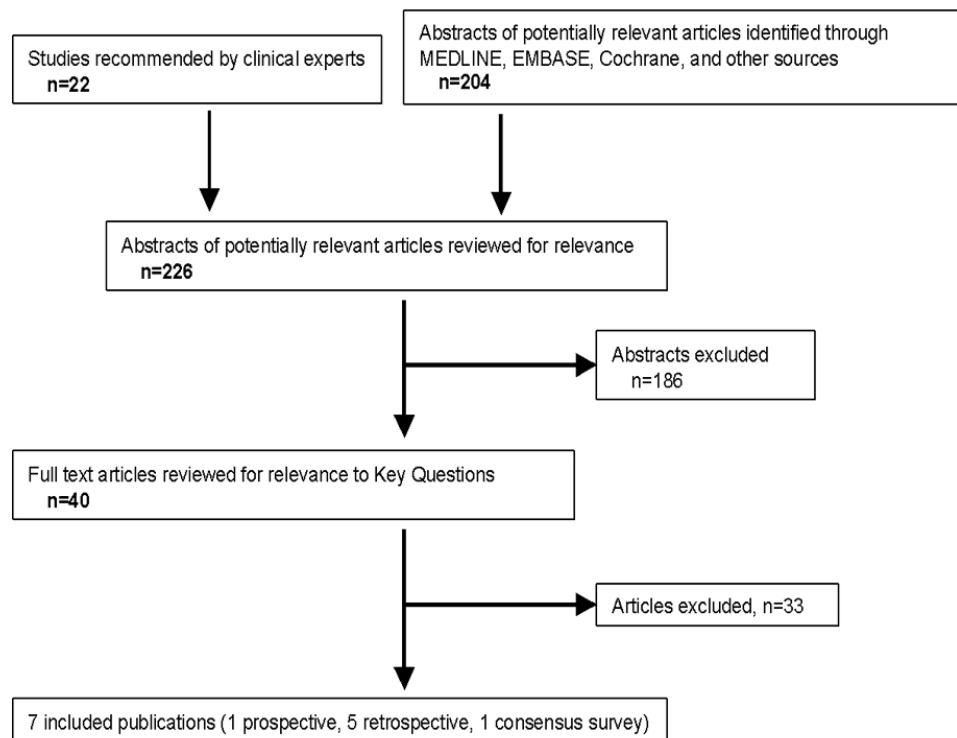

31 Figure 2: Literature search and study selection flow diagram for the systematic review on risk factors of  
32 ISCI.

33 639x483mm (38 x 38 DPI)

Table 1: Review Key Question on Risk factors for ISCI: Inclusion and exclusion criteria - population, prognostic factors, outcomes, studies.

|                                       | Inclusion                                                                                                                                                                                                                                                                                                                                                                                                                                                                                             | Exclusion                                                                                                                                                                                                                                                                                                                                                                                                                   |
|---------------------------------------|-------------------------------------------------------------------------------------------------------------------------------------------------------------------------------------------------------------------------------------------------------------------------------------------------------------------------------------------------------------------------------------------------------------------------------------------------------------------------------------------------------|-----------------------------------------------------------------------------------------------------------------------------------------------------------------------------------------------------------------------------------------------------------------------------------------------------------------------------------------------------------------------------------------------------------------------------|
| <b>Patients</b>                       | <ul style="list-style-type: none"> <li>• Adolescents (<math>\geq 11</math> years to <math>&lt; 18</math> years old) or adults (<math>\geq 18</math> years) undergoing any type of spine surgery for any indication or spine-related pathology (including trauma-related pathology, conus injuries, cauda equina injuries)</li> </ul>                                                                                                                                                                  | <ul style="list-style-type: none"> <li>• Patients <math>&lt; 11</math> years old</li> <li>• Patients undergoing surgery for pathologies not involving the spine (e.g., vascular surgeries)</li> <li>• Patients with new post-operative compression (e.g., hematoma, abscess)</li> <li>• Patients with root-level deficits</li> <li>• Patients with neurological deficits due to cranial pathology (e.g., stroke)</li> </ul> |
| <b>Prognostic factors of interest</b> | <p><b><u>Primary Factors of interest:</u></b></p> <ul style="list-style-type: none"> <li>• <b>Clinical/pathology factors</b> (e.g., tumors [intra or extra-dural], scoliosis or other spinal deformity, myelopathy, trauma)</li> <li>• <b>Surgical factors</b> (e.g., surgical procedure, surgical approach, number of levels)</li> </ul> <p><b><u>Potential confounding factors:</u></b></p> <ul style="list-style-type: none"> <li>• <b>Demographic factors</b> (age, sex, BMI, smoking)</li> </ul> |                                                                                                                                                                                                                                                                                                                                                                                                                             |



|                       |                                                                                                                                                                                                                                                                                                                                                                                                                                                                                                            |                                                                                                                                                                                                                                                                                                                                                     |
|-----------------------|------------------------------------------------------------------------------------------------------------------------------------------------------------------------------------------------------------------------------------------------------------------------------------------------------------------------------------------------------------------------------------------------------------------------------------------------------------------------------------------------------------|-----------------------------------------------------------------------------------------------------------------------------------------------------------------------------------------------------------------------------------------------------------------------------------------------------------------------------------------------------|
| <p><b>Outcome</b></p> | <p>Documented intra-operative spinal cord injury defined as: new or worsening neurological deficit attributable to spinal cord dysfunction that occurs as the result of spine surgery either intra-operatively (diagnosed via intra-operative monitoring) or in the immediate post-operative period (based on clinical assessment); includes cauda-equina syndrome and conus compression in addition to cord compression.</p>                                                                              | <ul style="list-style-type: none"> <li>● Root-level injuries, nerve palsies, peripheral nerve injury</li> <li>● Hematoma, abscess</li> <li>● Ischemia following aorta or vascular surgery</li> <li>● Anesthesia effects</li> <li>● Brain/intracranial effects, pathologies (e.g., stroke)</li> </ul>                                                |
| <p><b>Studies</b></p> | <p>Studies with the highest methodological quality were focused on.</p> <ul style="list-style-type: none"> <li>● Prospective studies: if no prospective studies were available, retrospective studies were considered.</li> <li>● Only studies which controlled for confounding (e.g., patient, or clinical factors) were included for formal risk factor evaluation.</li> <li>● Case series and narrative reviews were considered in the absence of formal controlled studies of risk factors.</li> </ul> | <ul style="list-style-type: none"> <li>● Studies with &lt;15 patients</li> <li>● For formal risk factor evaluation, studies which do not control for potential confounding.</li> <li>● Case reports, case series, conference proceedings, abstracts, letters, white papers, cross-sectional studies</li> <li>● Animal or cadaver studies</li> </ul> |

**Table 2: Criteria for grading the quality of individual studies.**

| Rating      | Description and Criteria                                                                                                                                                                                                                                                                                                                                                                                                                 |
|-------------|------------------------------------------------------------------------------------------------------------------------------------------------------------------------------------------------------------------------------------------------------------------------------------------------------------------------------------------------------------------------------------------------------------------------------------------|
| <b>Good</b> | <ul style="list-style-type: none"> <li>● Low risk of bias, most criteria for quality are met, and results are generally considered valid</li> <li>● Valid methods for selection, inclusion, and treatment allocation; report similar baseline characteristics in different treatment groups; clearly describe attrition and have low attrition; appropriate means for preventing bias and use of appropriate analytic methods</li> </ul> |
| <b>Fair</b> | <ul style="list-style-type: none"> <li>● Some study flaws: may not meet all criteria for good quality, but no flaw is likely to cause major bias that would invalidate results; the study may be missing some information making it difficult to assess limitations and potential problems. This is a broad category; results from studies may or may not be valid.</li> </ul>                                                           |
| <b>Poor</b> | <ul style="list-style-type: none"> <li>● Significant flaws that imply biases of various kinds that may invalidate results; most criteria for a good quality study are not met and/or “fatal flaws” in design, analysis, or reporting are present; large amounts of missing information; discrepancies in reporting; or serious problems with intervention delivery</li> </ul>                                                            |

**Table 3: Contextual Question: Criteria/thresholds for intra-operative SCI and frequency**

| Deformity             |                                                                            |                                  |                                                                                                        |                                                         |
|-----------------------|----------------------------------------------------------------------------|----------------------------------|--------------------------------------------------------------------------------------------------------|---------------------------------------------------------|
| Author, Year          | Definition                                                                 | Indication of Surgery            | Alert Definition/ Threshold                                                                            | Timepoint                                               |
| Kato 2018 (SCOLI)     | Loss of LEMS at discharge in comparison to preoperative (baseline) status. | Complex adult spinal deformity   | Major decline: LEMS loss of 5 points or more<br>Minor decline: LEMS loss of less than 5 points         | LEMS compared to preoperative baseline                  |
| Fehlings 2018 (SCOLI) | Postoperative deterioration in ASIA LEMS compared with preoperative status | Complex adult spinal deformity   | Postoperative deterioration in ASIA LEMS compared with preoperative status, threshold NR               | ASIA LEMS at discharge                                  |
| Lenke 2016 (SCOLI)    | Decrease in ASIA LEMS postoperative compared to preoperative               | Complex adult spinal deformity   | Decrease in LEMS postop compared to preoperative, with normal LEMS= 50, abnormal LEMS <50.             | ASIA LEMS at 6 weeks                                    |
| Tumors                |                                                                            |                                  |                                                                                                        |                                                         |
| Harel 2017            | Decrease in McCormick grade                                                | Intradural extramedullary tumors | Mean McCormick grade. Patients graded as either stable or deteriorated compared to preoperative state. | Immediate postoperative, further follow-up not defined. |

|               |                                                              |                                                                 |                                                                                                                                                                                                        |                                                                         |
|---------------|--------------------------------------------------------------|-----------------------------------------------------------------|--------------------------------------------------------------------------------------------------------------------------------------------------------------------------------------------------------|-------------------------------------------------------------------------|
| Kang 2017     | Motor power as graded by the Medical Research Council System | Intradural extramedullary and epidural metastatic spinal tumors | Postoperative drop in patient's motor power by $\geq 1$ grade                                                                                                                                          | Acute period, 2 days postoperative, and before rehabilitation treatment |
| Korn 2014     | Decrease in modified McCormick grade                         | Extramedullary spinal cord tumors                               | Mean McCormick grade. Patients graded as either stable or deteriorated compared to preoperative state.                                                                                                 | 3 hours postoperative, 3 months, 6 months follow-up                     |
| Lakomkin 2017 | IONM signal change                                           | Spinal cord tumors                                              | True-positive defined when IONM signal change correlated either with a new, permanent postoperative motor and/or sensory deficit that remained present at a 6 months follow-up                         | 6 months                                                                |
| Sala 2006     | Decrease in McCormick grade                                  | Intramedullary spinal cord tumor                                | Patients given a value of 0 if they remained stable after surgery, and -1, -2, or -3 if they deteriorated after surgery by 1, 2, or 3 grade(s) on the McCormick scale, and +1, +2, +3 if they improved | Discharge and 3+ month follow-up                                        |
| Skinner 2005  | Intra-operative warning to surgeon                           | Intramedullary spinal cord lesions                              | True-positive case defined as a new or worsened postoperative motor deficit that was predicted by means                                                                                                | Postoperative, long-term follow-up varied by patient                    |

|  |  |  |                                                 |                         |
|--|--|--|-------------------------------------------------|-------------------------|
|  |  |  | of an intra-operative warning<br>to the surgeon | (range: 1-28<br>months) |
|--|--|--|-------------------------------------------------|-------------------------|

For Peer Review

**Table 4: Frequency of deficits spanning pathology type and level of surgery.**

| <b>Condition</b>     | <b>Number of studies<br/>(Range of sample<br/>size)</b> | <b>New deficit<br/>% (n/N)</b>                    | <b>Resolved Deficit<br/>% (n/N)</b> | <b>Persistent<br/>Deficit<br/>% (n/N)</b> |
|----------------------|---------------------------------------------------------|---------------------------------------------------|-------------------------------------|-------------------------------------------|
| <b>Deformity</b>     | 13 studies<br>(28 to 1121)                              | 0% (0/144, 0/452,<br>and 0/97) to 17.8%<br>(5/28) | NR to 92%<br>(200/217)              | NR to 8%<br>(17/217)                      |
| <b>Tumor</b>         | 13 studies<br>(13 to 1017)                              | 0% (0/19 and 0/68) to<br>61% (8/13)               | 34% (17/50) to<br>67% (681/1017)    | 7.4% (15/203) to<br>26.9% (14/52)         |
|                      |                                                         |                                                   |                                     |                                           |
| <b>Level</b>         | <b>Number of studies<br/>(Range of sample<br/>size)</b> | <b>New deficit<br/>% (n/N)</b>                    | <b>Resolved Deficit<br/>% (n/N)</b> | <b>Persistent<br/>Deficit<br/>% (n/N)</b> |
| <b>Cervical</b>      | 11 studies<br>(52 to 1445)                              | 0.09 (1/1039) to 5.7%<br>(10/175)                 | 1.8% (1/57) to<br>100% (246/246)    | NR                                        |
| <b>Thoracolumbar</b> | 2 studies<br>(173 to 295)                               | 0.7% (2/295) to 5.8%<br>(10/173)                  | NR                                  | NR                                        |
| <b>Thoracic</b>      | 3 studies<br>(r 44 to 871)                              | 0.6% (5/871) to<br>13.4% (11/82)                  | NR to 100%<br>(44/44)               | NR                                        |
| <b>Lumbar</b>        | 3 study<br>(35 to 113)                                  | 0 (0/113) to 28.5%<br>(10/35)                     | NR                                  | NR                                        |
| <b>Mixed</b>         | 16 studies<br>(5 to 2069)                               | 0% (0/2069) to 9.4<br>(6/64)                      | 2.2% (9/408) to<br>6.3% (4/64)      | 0.5% (1/176) to<br>4.9% (20/408)          |

Table 5: Data abstraction for included studies looking at risk factors for intraoperative neurological deficits.

| Author<br>Design                                                               | Population                                                                                                                                                                                                                                                                                                          | Exclusion<br>Criteria                                                                                                                                                                                                                                                                                                                                               | Surgery                                                                                                                                                                                                                                                                                                                                                                                        | Intraoperative<br>SCI definition<br>and Incidence                                                                        | Risk Factors Assessed*<br>Effect Estimate (95% CI) <sup>†</sup>                                                                                                                                                                                                                                                                                                                                                                                                                                                                                                                                                                                                                                                                                                                                                                                                                 | Funding<br>COI                                                                                                      |
|--------------------------------------------------------------------------------|---------------------------------------------------------------------------------------------------------------------------------------------------------------------------------------------------------------------------------------------------------------------------------------------------------------------|---------------------------------------------------------------------------------------------------------------------------------------------------------------------------------------------------------------------------------------------------------------------------------------------------------------------------------------------------------------------|------------------------------------------------------------------------------------------------------------------------------------------------------------------------------------------------------------------------------------------------------------------------------------------------------------------------------------------------------------------------------------------------|--------------------------------------------------------------------------------------------------------------------------|---------------------------------------------------------------------------------------------------------------------------------------------------------------------------------------------------------------------------------------------------------------------------------------------------------------------------------------------------------------------------------------------------------------------------------------------------------------------------------------------------------------------------------------------------------------------------------------------------------------------------------------------------------------------------------------------------------------------------------------------------------------------------------------------------------------------------------------------------------------------------------|---------------------------------------------------------------------------------------------------------------------|
| Deformity                                                                      |                                                                                                                                                                                                                                                                                                                     |                                                                                                                                                                                                                                                                                                                                                                     |                                                                                                                                                                                                                                                                                                                                                                                                |                                                                                                                          |                                                                                                                                                                                                                                                                                                                                                                                                                                                                                                                                                                                                                                                                                                                                                                                                                                                                                 |                                                                                                                     |
| Fehlings<br>2018<br><br>Prospective<br>cohort<br><br>Study<br>quality:<br>Good | Surgical Indication:<br>ASD with an apex<br>of the major<br>deformity in the<br>cervicothoracic or<br>the thoracolumbar<br>region between C7<br>and L2 inclusive<br>undergoing<br>complex ASD<br>surgery <sup>‡</sup><br><br>Eligible: N = 272<br>Analyzed: N = 265<br>Mean age: 56.8 ±<br>15.4 years<br>Males: 32% | <ul style="list-style-type: none"> <li>• Substance dependency</li> <li>• Psychosocial disturbance</li> <li>• Active malignancy</li> <li>• Active bacterial infection</li> <li>• Recent history of significant spinal trauma or malignancy</li> <li>• Complete long-term paraplegia</li> <li>• Pregnancy</li> <li>• Prisoners</li> <li>• Institutionalize</li> </ul> | <ul style="list-style-type: none"> <li>• Three-column osteotomy between C7 and L5 inclusive (76%)</li> <li>• Corrective osteotomies for revision of spinal deformity (61%) or for congenital spinal deformity (5%)</li> <li>• Corrective surgery for curvature with major Cobb angle of ≥80° in the coronal or sagittal plane (29%)</li> <li>• Reconstruction for deformity-related</li> </ul> | Decline in ASIA lower extremity motor score at discharge compared to preoperative status.<br><br>Incidence: 23% (61/265) | <u>Multivariable analysis</u> <ul style="list-style-type: none"> <li>• Age (per 10 years): OR = 1.53 (95% CI: 1.13 to 2.06)</li> <li>• Coronal deformity angular ratio (per 1 unit): OR = 1.10 (95% CI: 1.01 to 1.19)</li> <li>• Number of spinal levels involved (per 1 level): OR = 1.08 (95% CI: 0.99 to 1.17)</li> <li>• Lumbar-level osteotomy (yes vs. no): OR = 3.30 (95% CI: 1.18 to 9.17)</li> <li>• Prevalence of 3CO (yes vs. no): OR = 2.16 (95% CI: 0.77 to 6.08)</li> <li>• Estimated blood loss (per 500 cc): OR = 1.06 (95% CI: 0.97 to 1.15)</li> </ul><br><u>Univariate analysis</u> <ul style="list-style-type: none"> <li>• Previous history spine surgery (yes vs. no)</li> <li>• Preoperative neurological deficits (yes vs. no)</li> <li>• Sagittal deformity angular ratio (per 1 unit)</li> <li>• Surgical approach (anterior-posterior vs.</li> </ul> | Funding:<br>Scoliosis<br>Research Society<br>and AOSpine<br>International,<br>Norton<br>Healthcare<br><br>COI: None |

1  
2  
3  
4  
5  
6  
7  
8  
9  
10  
11  
12  
13  
14  
15  
16  
17  
18  
19  
20  
21  
22  
23  
24  
25  
26  
27  
28  
29  
30  
31  
32  
33  
34  
35  
36  
37  
38  
39  
40  
41  
42  
43  
44  
45  
46  
47

|                                                              |                                                                                                                                                                      |               |                                                                                                                                                                                                                                                                                                       |                                                                                                     |                                                                                                                                                                                                                                                                                                                                                                                            |                                                                                                                                      |
|--------------------------------------------------------------|----------------------------------------------------------------------------------------------------------------------------------------------------------------------|---------------|-------------------------------------------------------------------------------------------------------------------------------------------------------------------------------------------------------------------------------------------------------------------------------------------------------|-----------------------------------------------------------------------------------------------------|--------------------------------------------------------------------------------------------------------------------------------------------------------------------------------------------------------------------------------------------------------------------------------------------------------------------------------------------------------------------------------------------|--------------------------------------------------------------------------------------------------------------------------------------|
|                                                              |                                                                                                                                                                      | d individuals | <ul style="list-style-type: none"> <li>myelopathy (5%)</li> <li>• Deformity reconstruction with concomitant spinal cord decompression for OLF or OPLL (2%)</li> <li>• Osteotomy level: Lumbar: 73% Thoracic: 43%</li> <li>• Surgical approach: Posterior only: 77% Anterior-posterior: 23%</li> </ul> |                                                                                                     | posterior only)                                                                                                                                                                                                                                                                                                                                                                            |                                                                                                                                      |
| Zhang 2017<br>Retrospective cohort<br>Study<br>quality: Fair | <p>Surgical Indication: Congenital scoliosis (19.3%), kyphoscoliosis (74.2%), kyphosis (6.5%)</p> <p>Eligible: N = NR<br/>Analyzed: N = 62<br/>Mean age (range):</p> | NR            | <ul style="list-style-type: none"> <li>• Thoracic posterior vertebral column resection</li> </ul>                                                                                                                                                                                                     | <p>Decrease in ASIA grade at discharge. Not explicitly defined.</p> <p>Incidence: 16.1% (10/62)</p> | <p><u>Multivariable analysis</u></p> <ul style="list-style-type: none"> <li>• Age (≥18 vs. &lt;18 years): OR = 8.27 (95% CI: 1.17 to 58.71)</li> <li>• Pulmonary function (normal vs. abnormal): OR = 2.10 (95% CI: 0.99 to 4.48)</li> <li>• Pre-operative neurological status (normal vs. abnormal): OR = NR, p&gt;0.05</li> <li>• Blood loss (&gt;50% vs. &lt;50%): OR = 3.05</li> </ul> | <p>Funding: Science and technology innovation project in Shaanxi Province of China, Natural Science Foundation of China, Natural</p> |



|                                                                                               |                                                                                                                                                                                        |                                                                                                                                                                                                   |                                                                                                                                                                           |                                                                                                                              |                                                                                                                                                                                                                                                                                                                                                                                                                                                                                                                                                                                                                                             |                                                                                                                                             |
|-----------------------------------------------------------------------------------------------|----------------------------------------------------------------------------------------------------------------------------------------------------------------------------------------|---------------------------------------------------------------------------------------------------------------------------------------------------------------------------------------------------|---------------------------------------------------------------------------------------------------------------------------------------------------------------------------|------------------------------------------------------------------------------------------------------------------------------|---------------------------------------------------------------------------------------------------------------------------------------------------------------------------------------------------------------------------------------------------------------------------------------------------------------------------------------------------------------------------------------------------------------------------------------------------------------------------------------------------------------------------------------------------------------------------------------------------------------------------------------------|---------------------------------------------------------------------------------------------------------------------------------------------|
|                                                                                               | 16.3 (6 to 46) years<br>Males: 45.2%                                                                                                                                                   |                                                                                                                                                                                                   |                                                                                                                                                                           |                                                                                                                              | (95% CI: 1.16 to 8.05)<br><br><u>Univariate analysis</u><br><ul style="list-style-type: none"> <li>• Cobb (main curve) (<math>\geq 90</math> vs. <math>&lt; 90</math>)</li> <li>• Operative time (<math>\geq 480</math> vs. <math>&lt; 480</math> minutes)</li> <li>• BMI (normal vs. abnormal)</li> <li>• Malformation type (kyphoscoliosis vs. scoliosis + kyphosis)</li> <li>• Number of vertebrae fused (<math>\geq 10</math> vs. <math>\leq 10</math>)</li> <li>• Number of vertebrae resected (<math>\geq 2</math> vs. 1)</li> <li>• Use of titanium mesh/cage (yes vs. no)</li> <li>• Intraspinous deformity (yes vs. no)</li> </ul> | Science Basic Research Plan in Shaanxi Province in China, and the Youth Development Project of the Army Medical Technology<br><br>COI: None |
| Mixed surgical indications                                                                    |                                                                                                                                                                                        |                                                                                                                                                                                                   |                                                                                                                                                                           |                                                                                                                              |                                                                                                                                                                                                                                                                                                                                                                                                                                                                                                                                                                                                                                             |                                                                                                                                             |
| Chen 2012<br><br>Retrospective cohort (matched pairs) <sup>§</sup><br><br>Study quality: Good | Surgical Indication: Spinal degeneration (35%), spinal tumor (23%), spinal trauma (22%), spinal deformity (16%), and spinal inflammation (4%)<br><br>Eligible: NR<br>Analyzed: N = 316 | <ul style="list-style-type: none"> <li>• Major and current psychiatric illnesses or cognitive deficits</li> <li>• Neurological function of spinal cord could not be measured correctly</li> </ul> | <ul style="list-style-type: none"> <li>• Decompression</li> <li>• Internal fixation</li> <li>• Bone graft</li> <li>• Reduction</li> </ul> (No other information provided) | Iatrogenic SCI defined as a decrease in postoperative ASIA grade. No further details given.<br><br>Incidence: 25% (79/316)** | <u>Multivariable analysis</u><br><ul style="list-style-type: none"> <li>• Age (continuous<sup>§§</sup>): OR = 1.08 (95% CI: 1.03 to 1.13)</li> <li>• Sex (male vs. female): OR = 5.22 (95% CI: 1.86 to 14.62)</li> <li>• Hypertension (yes vs. no): OR = 15.18 (95% CI: 4.50 to 51.17)</li> <li>• Preoperative spinal cord function (AIS A-D; better vs. worse): OR = 0.35 (95% CI: 0.18 to 0.66)</li> <li>• Involved segments (more vs. less): OR =</li> </ul>                                                                                                                                                                             | Funding: Ministry of Science and Technology of the People's Republic of China<br><br>COI: None                                              |

1  
2  
3  
4  
5  
6  
7  
8  
9  
10  
11  
12  
13  
14  
15  
16  
17  
18  
19  
20  
21  
22  
23  
24  
25  
26  
27  
28  
29  
30  
31  
32  
33  
34  
35  
36  
37  
38  
39  
40  
41  
42  
43  
44  
45  
46  
47

|                                                                   |                                                                                                                      |                                                                                                                                                                                                                                                                                                   |                                                                                                                                                                  |                                                                                          |                                                                                                                                                                                                                                                                                                                                        |                                                |
|-------------------------------------------------------------------|----------------------------------------------------------------------------------------------------------------------|---------------------------------------------------------------------------------------------------------------------------------------------------------------------------------------------------------------------------------------------------------------------------------------------------|------------------------------------------------------------------------------------------------------------------------------------------------------------------|------------------------------------------------------------------------------------------|----------------------------------------------------------------------------------------------------------------------------------------------------------------------------------------------------------------------------------------------------------------------------------------------------------------------------------------|------------------------------------------------|
|                                                                   | <p>Mean age: 33.33 ± 7.69 years<br/>Males: 70%</p>                                                                   | <ul style="list-style-type: none"> <li>• Significant traumatic brain injuries</li> <li>• Major medical diseases</li> <li>• Major neurological deficits or diseases</li> <li>• Pregnancy</li> <li>• Life-threatening injuries or other concurrent injuries which prevent spinal surgery</li> </ul> |                                                                                                                                                                  |                                                                                          | <p>3.28 (95% CI: 1.55 to 6.92)</p> <p><u>Univariate analysis</u></p> <ul style="list-style-type: none"> <li>• Diabetes mellitus</li> <li>• Extent of compression to spinal cord on MRI (normal, decompression without ischemia and ischemia)</li> </ul>                                                                                |                                                |
| <p>Romero-Munoz 2019</p> <p>Retrospective cohort</p> <p>Study</p> | <p>Cases were of intra-op SCI from elective surgery, control population appear to be SCI from other presentation</p> | <ul style="list-style-type: none"> <li>• SCI following primary or metastatic cancer surgery</li> <li>• SCI secondary to diagnostic procedures,</li> </ul>                                                                                                                                         | <p><u>Cervical</u></p> <ul style="list-style-type: none"> <li>• Discectomy and arthrodesis</li> <li>• Corpectomy and arthrodesis</li> </ul> <p><u>Lumbar</u></p> | <p>Decrease in ASIA grade at discharge. Not explicitly defined.</p> <p>Incidence: 9%</p> | <p><u>Multivariable analysis (all adjusted for age)</u></p> <ul style="list-style-type: none"> <li>• Age (continuous<sup>§§</sup>, median): OR = 1.004 (95% CI: 0.98 to 1.03)</li> <li>• Diabetes mellitus (yes vs. no): OR = 0.70 (95% CI: 0.20 to 2.38)</li> <li>• Obesity (yes vs. no): OR = 0.52 (95% CI: 0.16 to 1.69)</li> </ul> | <p>Funding: None received</p> <p>COI: None</p> |

|               |                                                                                                                                                                                                                                                                                                                                                                                                                             |                                                             |                                                                                                                     |                           |                                                                                                                                                                                                                                                                                                                                                                                                                                                                                                                            |  |
|---------------|-----------------------------------------------------------------------------------------------------------------------------------------------------------------------------------------------------------------------------------------------------------------------------------------------------------------------------------------------------------------------------------------------------------------------------|-------------------------------------------------------------|---------------------------------------------------------------------------------------------------------------------|---------------------------|----------------------------------------------------------------------------------------------------------------------------------------------------------------------------------------------------------------------------------------------------------------------------------------------------------------------------------------------------------------------------------------------------------------------------------------------------------------------------------------------------------------------------|--|
| quality: Fair | <p>Surgical Indication:</p> <p>Spinal degeneration (i.e., stenosis, disc herniation, spondylolisthesis w/w/o spinal stenosis), primarily presenting with pain and radiculopathy without deficit (75%); spinal deformity (i.e., scoliosis or kyphosis) (17.5%); spine fracture (3.5%); other<sup>††</sup> (4%)</p> <p>Location of SCI:</p> <p>Cervical (30%), Thoracic (43%), and Lumbar (27%)</p> <p>Eligible: N = 1282</p> | epidural puncture or procedures performed during childbirth | <ul style="list-style-type: none"> <li>• Laminectomy and discectomy</li> <li>Laminectomy and arthrodesis</li> </ul> | (114/1282) <sup>***</sup> | <ul style="list-style-type: none"> <li>• Hypertension (yes vs. no): OR = 1.47 (95% CI: 0.56 to 3.86)</li> <li>• Dyslipidemia (yes vs. no): OR = 0.48 (95% CI: 0.16 to 1.47)<sup>††</sup></li> <li>• Depression (yes vs. no): OR = 2.69 (95% CI: 0.95 to 7.59)</li> </ul> <p><u>Univariate analysis</u></p> <ul style="list-style-type: none"> <li>• Sex (female vs. male)</li> <li>• Spinal Cord Independence Measure at baseline (continuous, median)</li> <li>• AIS scale at baseline (absolute frequency, %)</li> </ul> |  |
|---------------|-----------------------------------------------------------------------------------------------------------------------------------------------------------------------------------------------------------------------------------------------------------------------------------------------------------------------------------------------------------------------------------------------------------------------------|-------------------------------------------------------------|---------------------------------------------------------------------------------------------------------------------|---------------------------|----------------------------------------------------------------------------------------------------------------------------------------------------------------------------------------------------------------------------------------------------------------------------------------------------------------------------------------------------------------------------------------------------------------------------------------------------------------------------------------------------------------------------|--|

|                                                         |                                                                                                    |                                                                                                                                                                                                                                                                                   |                                                                                                                    |                                                                                                                                                                                                                        |                                                                                                                                                                                                                                                                                                                                                                                                                                                                                                                                                                                                                                                                                                                                                                                                                                                   |                                       |
|---------------------------------------------------------|----------------------------------------------------------------------------------------------------|-----------------------------------------------------------------------------------------------------------------------------------------------------------------------------------------------------------------------------------------------------------------------------------|--------------------------------------------------------------------------------------------------------------------|------------------------------------------------------------------------------------------------------------------------------------------------------------------------------------------------------------------------|---------------------------------------------------------------------------------------------------------------------------------------------------------------------------------------------------------------------------------------------------------------------------------------------------------------------------------------------------------------------------------------------------------------------------------------------------------------------------------------------------------------------------------------------------------------------------------------------------------------------------------------------------------------------------------------------------------------------------------------------------------------------------------------------------------------------------------------------------|---------------------------------------|
|                                                         | Analyzed: N = 1282<br>Mean age (IQR): 58<br>(45 to 69) years<br>Males: 54.4%                       |                                                                                                                                                                                                                                                                                   |                                                                                                                    |                                                                                                                                                                                                                        |                                                                                                                                                                                                                                                                                                                                                                                                                                                                                                                                                                                                                                                                                                                                                                                                                                                   |                                       |
| Degenerative spine disease                              |                                                                                                    |                                                                                                                                                                                                                                                                                   |                                                                                                                    |                                                                                                                                                                                                                        |                                                                                                                                                                                                                                                                                                                                                                                                                                                                                                                                                                                                                                                                                                                                                                                                                                                   |                                       |
| Kim 2021<br>Retrospective cohort<br>Study quality: Poor | Surgical Indication: OPLL<br>Eligible: N = 210<br>Analyzed: N = 196<br>Mean age: NR<br>Males: 67.3 | <ul style="list-style-type: none"> <li>Other indications for ACDF than OPLL (infection, fracture, tumor and/or inflammatory and congenital musculoskeletal disorders</li> <li>Patients undergoing other concurrent surgery (e.g., posterior cervical fusion, occipito-</li> </ul> | <ul style="list-style-type: none"> <li>Anterior cervical discectomy with fusion with/without corpectomy</li> </ul> | <p>Postoperative neurological complications defined as “any new limb motor or sensory neurological deficits observed immediately post-operation”.</p> <p>No further details given.</p> <p>Incidence: 7.1% (14/196)</p> | <p><u>Multivariable analysis</u></p> <ul style="list-style-type: none"> <li>Sex (male vs. female): OR = 1.378 (95% CI: 0.33 to 5.79)</li> <li>Age (continuous<sup>§§</sup>): OR = 0.97 (95% CI: 0.89 to 1.05)</li> <li>BMI (continuous<sup>§§</sup>): OR = 1.11 (95% CI: 0.96 to 1.29)</li> <li>Compressive myelopathy prior to surgery (yes vs. no): OR = 8.24 (95% CI: 1.57 to 43.38)</li> <li>CCI score (categorical, 0, 1, 2, or ≥3; lower vs. higher): OR = 1.02 (95% CI: 0.49 to 2.14)</li> <li>Operation type (emergency vs. elective): OR = 0.00 (95% CI: NR), p=0.999</li> <li>Operative time (continuous<sup>§§</sup>): OR = 1.004 (95% CI: 0.99 to 1.01)</li> <li>Number of levels fused (1 to 2 vs. ≥3): OR = 1.36 (95% CI: 0.59 to 3.11)</li> <li>Blood loss (continuous<sup>§§</sup>): OR = 1.00 (95% CI: 0.99 to 1.002)</li> </ul> | <p>Funding: None</p> <p>COI: None</p> |

|  |  |                                                                                                                                                                    |  |  |                                                                                                                                                                                                                                                |  |
|--|--|--------------------------------------------------------------------------------------------------------------------------------------------------------------------|--|--|------------------------------------------------------------------------------------------------------------------------------------------------------------------------------------------------------------------------------------------------|--|
|  |  | cervical<br>fusion, atlanto-<br>axial fusion,<br>cranial<br>surgery)<br>• Inadequate<br>medical<br>records to<br>confirm<br>postoperative<br>neurological<br>state |  |  | <ul style="list-style-type: none"> <li>• Use of intraoperative neuromonitoring (yes vs. no): OR = 0.14 (95% CI: 0.04 to 0.52)</li> </ul> <u>Univariate analysis</u> <ul style="list-style-type: none"> <li>• Race (Asian vs. other)</li> </ul> |  |
|--|--|--------------------------------------------------------------------------------------------------------------------------------------------------------------------|--|--|------------------------------------------------------------------------------------------------------------------------------------------------------------------------------------------------------------------------------------------------|--|

3CO = 3 column osteotomy; AIS = ASIA Impairment Scale; ASD = adult spinal deformity; ASIA = American Spinal Injury Association; CCI = Charlson Comorbidity Index; COI = conflict of interest; CI = confidence interval; ICD-9 = International Classification of Diseases, Ninth Revision; IQR = interquartile range; NR = Not reported; OLF = ossification of the ligamentum flavum; OPLL = ossification of the posterior longitudinal ligament; OR = Odds Ratio; ROB = Risk of bias; SCI = Spinal cord injury.

\* If no definition of variable is listed, the article did not provide one.

† Risk factors represent all variables in a given study's univariate and multivariable analyses. Only those with effect sizes were included in multivariable analyses; all others were explicitly stated to have not been used beyond univariate analyses due to non-significance, but were otherwise assessed for an association using univariate statistical methods.

‡ Patients were selected based on the procedure performed: had to be one of the surgeries in the surgery column.

1  
2  
3  
4 § Matched-pairs. Patient with SCI (n=79) were matched with patients without SCI (n=237) in a 1:3 ratio on the following factors: primary disease,  
5 hospital, and similar procedure.  
6

7 \*\* All cases, as controls were included based on lack of SCI.  
8

9  
10 †† Text in results says dyslipidemia is only factor to show significance (OR=0.34, 95% CI: 0.12 to 0.96, p=0.04), however table 9 summarizing the results  
11 of all factors in multivariable regression lists that dyslipidemia is not significant (OR=0.48, 95% CI: 0.16 to 1.47, p=0.197).  
12

13 ‡‡ Arnold Chiari, vertebroplasty, cervical epidural electrode, coccygodynia.  
14

15 §§ Authors do not report details, assumed continuous.  
16

17 \*\*\* 114 cases of SCI following elective surgery.  
18  
19  
20  
21  
22  
23  
24  
25  
26  
27  
28  
29  
30  
31  
32  
33  
34  
35  
36  
37  
38  
39  
40  
41  
42  
43  
44  
45  
46  
47

Table 6: Data abstraction for included studies looking at risk factors for intraoperative monitoring warnings.

| Author                                                                | Population                                                                                                                                                          | Exclusion Criteria | Surgery                                                                                       | Intraoperative SCI definition                                                                                                                                                                                                                                                            | Risk Factors Assessed*<br>Effect Estimate (95% CI) <sup>†</sup>                                                                                                                                                                                                  | Funding<br>COI                                                                                                                                                                 |
|-----------------------------------------------------------------------|---------------------------------------------------------------------------------------------------------------------------------------------------------------------|--------------------|-----------------------------------------------------------------------------------------------|------------------------------------------------------------------------------------------------------------------------------------------------------------------------------------------------------------------------------------------------------------------------------------------|------------------------------------------------------------------------------------------------------------------------------------------------------------------------------------------------------------------------------------------------------------------|--------------------------------------------------------------------------------------------------------------------------------------------------------------------------------|
| Deformity                                                             |                                                                                                                                                                     |                    |                                                                                               |                                                                                                                                                                                                                                                                                          |                                                                                                                                                                                                                                                                  |                                                                                                                                                                                |
| Buckland<br>2018<br>Retrospective cohort<br>Study<br>quality:<br>Poor | Surgical<br>Indication:<br>Adolescent<br>idiopathic<br>scoliosis<br>Eligible: N =<br>2210<br>Analyzed: N =<br>2210<br>Mean age: 14.7 ±<br>2.1 years<br>Males: 19.4% | NR                 | <ul style="list-style-type: none"> <li>Ponte osteotomy</li> <li>No Ponte osteotomy</li> </ul> | <p>Perioperative nerve root or SCI as identified by surgeon.</p> <p>Intraoperative neuromonitoring alerts as outcome. No further detail given.</p> <p>Intraoperative neuromonitoring warnings defined as:</p> <p>SSEP: Decrease ≥50% amplitude</p> <p>TcMEP: Decrease ≥50% amplitude</p> | <p><u>Multivariable analysis</u></p> <ul style="list-style-type: none"> <li>Ponte osteotomy (yes vs. no): OR = NR, p&lt;0.001</li> <li>Curve magnitude (continuous<sup>‡</sup>): OR = NR, p&lt;0.001</li> </ul> <p><u>Univariate analysis</u></p> <p>Unclear</p> | <p>Funding: DePuy Synthes Spine</p> <p>COI: Board membership, consultancy, royalties, grants, stocks, employment, payment for lecture, patients. No further details given.</p> |

1  
2  
3  
4  
5  
6  
7  
8  
9  
10  
11  
12  
13  
14  
15  
16  
17  
18  
19  
20  
21  
22  
23  
24  
25  
26  
27  
28  
29  
30  
31  
32  
33  
34  
35  
36  
37  
38  
39  
40  
41  
42  
43  
44  
45  
46  
47

|  |  |  |  |                             |  |  |
|--|--|--|--|-----------------------------|--|--|
|  |  |  |  | Incidence: 0.3%<br>(7/2210) |  |  |
|--|--|--|--|-----------------------------|--|--|

3CO = 3 column osteotomy; AIS = ASIA Impairment Scale; ASIA = American Spinal Injury Association; CCI = Charlson Comorbidity Index; COI = conflict of interest; CI = confidence interval; IQR = interquartile range; NR = Not reported; OR = Odds Ratio; ROB = Risk of bias; SCI = Spinal cord injury; SSEP = Somatosensory evoked potentials; TcMEP = Transcranial motor evoked potentials.

\* If no definition of variable is listed, the article did not provide one.

† Risk factors represent all variables in a given study’s univariate and multivariable analyses. Only those with effect sizes were included in multivariable analyses; all others were explicitly stated to have not been used beyond univariate analyses due to non-significance, but were otherwise assessed for an association using univariate statistical methods.

‡ Authors do not report details, assumed continuous.



**Table 7: Demographic, clinical, surgical, and radiographic factors potentially associated with intra-operative SCI in studies that conducted multivariable analyses. \***

|                                  | Risk factors for Neurological Deficits |                                                          |                                                                   |                                    |                      |                                    |
|----------------------------------|----------------------------------------|----------------------------------------------------------|-------------------------------------------------------------------|------------------------------------|----------------------|------------------------------------|
|                                  | Deformity                              |                                                          | Mixed surgical indication                                         |                                    | Degeneration         | Deformity                          |
|                                  | Fehlings                               | Zhang                                                    | Chen                                                              | Romero-Muñoz                       | Kim                  | Buckland                           |
|                                  | 2018                                   | 2017                                                     | 2012                                                              | 2019                               | 2021                 | 2018                               |
| Intraoperative<br>SCI definition | ASIA                                   | ASIA                                                     | ASIA                                                              | ASIA                               | Unclear <sup>†</sup> | IONM <sup>‡</sup>                  |
| Surgical<br>indication           | Scoliosis                              | Congenital<br>scoliosis,<br>kyphoscoliosis<br>, kyphosis | Spinal degeneration,<br>tumor, trauma,<br>deformity, inflammation | Cervical, lumbar<br>spine injuries | OPLL                 | Adolescent idiopathic<br>scoliosis |
| ROB:                             | Low                                    | Moderate                                                 | Low                                                               | Moderate                           | High                 | High                               |
| Risk Factor                      |                                        |                                                          |                                                                   |                                    |                      |                                    |

1  
2  
3  
4  
5  
6  
7  
8  
9  
10  
11  
12  
13  
14  
15  
16  
17  
18  
19  
20  
21  
22  
23  
24  
25  
26  
27  
28  
29  
30  
31  
32  
33  
34  
35  
36  
37  
38  
39  
40  
41  
42  
43  
44  
45  
46  
47

|                                |                                            |     |                  |     |    |    |  |
|--------------------------------|--------------------------------------------|-----|------------------|-----|----|----|--|
| Patient<br>character<br>istics | Age                                        | Yes | Yes              | Yes | No | No |  |
|                                | Sex                                        |     |                  | Yes |    | No |  |
|                                | Hypertension                               |     |                  | Yes | No |    |  |
|                                | Diabetes                                   |     |                  |     | No |    |  |
|                                | BMI/Obesity                                |     |                  |     | No | No |  |
|                                | Depression                                 |     |                  |     | No |    |  |
|                                | CCI score                                  |     |                  |     |    | No |  |
|                                | Dyslipidemia                               |     |                  |     | No |    |  |
|                                | Pulmonary<br>function                      |     | Yes <sup>s</sup> |     |    |    |  |
| Clinical                       | Preoperative<br>AIS/neurological<br>status |     | No               | Yes |    |    |  |

1  
2  
3  
4  
5  
6  
7  
8  
9  
10  
11  
12  
13  
14  
15  
16  
17  
18  
19  
20  
21  
22  
23  
24  
25  
26  
27  
28  
29  
30  
31  
32  
33  
34  
35  
36  
37  
38  
39  
40  
41  
42  
43  
44  
45  
46  
47

|          |                                        |     |     |     |  |     |     |
|----------|----------------------------------------|-----|-----|-----|--|-----|-----|
|          | Combined myelopathy                    |     |     |     |  | Yes |     |
|          | Blood loss                             | No  | Yes |     |  | No  |     |
|          | No. of spinal levels/involved segments | No  |     | Yes |  | No  |     |
|          | Operation type                         |     |     |     |  | No  |     |
|          | Operation time                         |     |     |     |  | No  |     |
|          | Use of intra-operative monitoring      |     |     |     |  | Yes |     |
|          | Lumbar-level osteotomy                 | Yes |     |     |  |     |     |
| Surgical | Ponte-osteotomy                        |     |     |     |  |     | Yes |

1  
2  
3  
4  
5  
6  
7  
8  
9  
10  
11  
12  
13  
14  
15  
16  
17  
18  
19  
20  
21  
22  
23  
24  
25  
26  
27  
28  
29  
30  
31  
32  
33  
34  
35  
36  
37  
38  
39  
40  
41  
42  
43  
44  
45  
46  
47

|              |                   |     |  |  |  |  |     |
|--------------|-------------------|-----|--|--|--|--|-----|
|              | Prevalence of 3CO | No  |  |  |  |  |     |
| Radiographic | Coronal DAR       | Yes |  |  |  |  |     |
|              | Curve magnitude   |     |  |  |  |  | Yes |

3CO = 3 column osteotomy; ASIA = American Spinal Cord Injury Association; AIS = ASIA Impairment Scale; BMI = Body mass index; CCI = Charlson Comorbidity Index; DAR = deformity angular ratio; ICD-9 = International Classification of Diseases, Ninth Revision; IONM = Intra-operative neuromonitoring; OPLL = ossification of posterior longitudinal ligament; SCI = Spinal cord injury, ROB = risk of bias.

\* “Yes” indicates that a given factor was associated with the outcome in multivariate analysis; “no” indicates that a given factor was not associated in multivariate analysis.

† Kim 2021 defined new neurological deficits as “any new limb motor or sensory neurological deficits observed immediately post-operation”. Every included patient was checked for their neurological status preoperatively, immediately after awakening from anesthesia, 1 day after operation, discharge period and follow up periods at outpatient clinics. No further details given.

‡ Authors report that a neuromonitoring alert was defined as a reduction in amplitude of 50% or more in SSEPs and/or tcMEPs. Increases in response latency were not included based on prior literature suggesting that it was not an independent sign of neurological injury in spine surgery.

1  
2  
3  
4  
5  
6  
7  
8  
9  
10  
11  
12  
13  
14  
15  
16  
17  
18  
19  
20  
21  
22  
23  
24  
25  
26  
27  
28  
29  
30  
31  
32  
33  
34  
35  
36  
37  
38  
39  
40  
41  
42  
43  
44  
45  
46  
47

§ Marginal association. OR=2.10 (95% CI 0.99 to 4.48), p=0.054

For Peer Review

**Table 8: All demographic, clinical, surgical, and radiographic factors explored/evaluated as prognostic factors for intraoperative SCI in univariate analyses\***

|                        |                     | Risk factors for Neurological Deficits |                                                |                                                             |                                 | Risk factors for IONM <sup>‡</sup> | Expert Consensus                |
|------------------------|---------------------|----------------------------------------|------------------------------------------------|-------------------------------------------------------------|---------------------------------|------------------------------------|---------------------------------|
| Intraop SCI definition |                     | Deformity                              |                                                | Mixed surgical indication                                   | Degeneration                    | Deformity                          |                                 |
|                        | Fehlings            | Zhang                                  | Chen                                           | Romero-Muñoz                                                | Kim                             | Buckland                           | Iyer                            |
|                        | 2018                | 2017                                   | 2012                                           | 2019                                                        | 2021                            | 2018                               | 2022 <sup>§</sup>               |
|                        | ASIA                | ASIA                                   | ASIA                                           | ASIA                                                        | Unclear <sup>†</sup>            | IONM <sup>‡</sup>                  | IONM                            |
|                        | Surgical indication | Scoliosis                              | Congenital scoliosis, kyphoscoliosis, kyphosis | Spinal degeneration, tumor, trauma, deformity, inflammation | Cervical, lumbar spine injuries | OPLL                               | Adolescent idiopathic scoliosis |
| ROB:                   | Low                 | Moderate                               | Low                                            | Moderate                                                    | High                            | High                               | NA                              |
| Risk Factor            |                     |                                        |                                                |                                                             |                                 |                                    |                                 |
|                        | Age                 | M                                      | M                                              | M                                                           | M                               | M                                  | √                               |
|                        | Sex                 |                                        |                                                | M                                                           | U                               | M                                  |                                 |
|                        | Race                |                                        |                                                |                                                             |                                 | U                                  |                                 |
|                        | Hypertension        |                                        |                                                | M                                                           | M                               |                                    |                                 |
|                        | Diabetes            |                                        |                                                | U                                                           | M                               |                                    |                                 |
|                        | BMI/Obesity         |                                        | U                                              |                                                             | M                               | M                                  | √                               |

|    |                                      |   |   |  |   |   |  |   |
|----|--------------------------------------|---|---|--|---|---|--|---|
| 1  | Depression                           |   |   |  | M |   |  |   |
| 2  | Previous surgery                     | U |   |  |   |   |  |   |
| 3  | CCI score                            |   |   |  |   | M |  |   |
| 4  | SCIM                                 |   |   |  | U |   |  |   |
| 5  | Dyslipidemia                         |   |   |  | M |   |  |   |
| 6  | Intraspinal deformity                |   | U |  |   |   |  | √ |
| 7  | Malformation type                    |   | U |  |   |   |  |   |
| 8  | Non-idiopathic etiology              |   |   |  |   |   |  | √ |
| 9  | Congenital scoliosis                 |   |   |  |   |   |  | √ |
| 10 | Congenital kyphosis                  |   |   |  |   |   |  | √ |
| 11 | Syndromic etiology                   |   |   |  |   |   |  | √ |
| 12 | Neurological comorbidity             |   |   |  |   |   |  | √ |
| 13 | Current tethered cord                |   |   |  |   |   |  | √ |
| 14 | Split cord malformation              |   |   |  |   |   |  | √ |
| 15 | Presence of syrinx $\geq 4\text{mm}$ |   |   |  |   |   |  | √ |

1  
2  
3  
4  
5  
6  
7  
8  
9  
10  
11  
12  
13  
14  
15  
16  
17  
18  
19  
20  
21  
22  
23  
24  
25  
26  
27  
28  
29  
30  
31  
32  
33  
34  
35  
36  
37  
38  
39  
40  
41  
42  
43  
44  
45  
46  
47  
48  
49  
50  
51  
52  
53  
54  
55  
56  
57  
58  
59  
60

|          |                                        |   |   |   |   |   |  |   |
|----------|----------------------------------------|---|---|---|---|---|--|---|
|          | Preoperative myelopathy                |   |   |   |   |   |  | √ |
|          | Skeletal dysplasia                     |   |   |   |   |   |  | √ |
|          | Cardiopulmonary comorbidity            |   |   |   |   |   |  | √ |
|          | Neuromuscular etiology                 |   |   |   |   |   |  | √ |
|          | Chronic anemia                         |   |   |   |   |   |  | √ |
|          | Presence of syrinx of any size         |   |   |   |   |   |  | √ |
| Clinical | Preoperative AIS/neurological status   | U | M | M | U |   |  |   |
|          | Combined myelopathy                    |   |   |   |   | M |  |   |
|          | Blood loss                             | M | M |   |   | M |  |   |
|          | Pulmonary function                     |   | U |   |   |   |  |   |
|          | No. of spinal levels/involved segments | M |   | M |   | M |  |   |
|          | No. of levels/vertebrae fused          |   | U |   |   |   |  |   |



|                                                     |   |   |   |  |   |   |   |
|-----------------------------------------------------|---|---|---|--|---|---|---|
| No. of vertebrae resected                           |   | U |   |  |   |   |   |
| Operation type                                      | U |   |   |  | M |   |   |
| Operation time                                      |   | U |   |  | M |   |   |
| Use of intraoperative monitoring                    |   |   |   |  | M |   | √ |
| Use of MRI                                          |   |   | U |  |   |   |   |
| Use of titanium mesh/cage                           |   | U |   |  |   |   |   |
| Lumbar-level osteotomy                              | M |   |   |  |   |   |   |
| Ponte-osteotomy                                     |   |   |   |  |   | M |   |
| Prevalence of 3CO                                   | M |   |   |  |   |   |   |
| Revision surgery                                    |   |   |   |  |   |   | √ |
| Prior ASF with vessel ligation                      |   |   |   |  |   |   | √ |
| Prior intradural surgery                            |   |   |   |  |   |   | √ |
| Absence of baseline IONM data, or poor-quality data |   |   |   |  |   |   | √ |
| Revision surgery                                    |   |   |   |  |   |   | √ |

1  
2  
3  
4  
5  
6  
7  
8  
9  
10  
11  
12  
13  
14  
15  
16  
17  
18  
19  
20  
21  
22  
23  
24  
25  
26  
27  
28  
29  
30  
31  
32  
33  
34  
35  
36  
37  
38  
39  
40  
41  
42  
43  
44  
45  
46  
47  
48  
49  
50  
51  
52  
53  
54  
55  
56  
57  
58  
59  
60

|              |                                                     |   |   |  |  |   |   |
|--------------|-----------------------------------------------------|---|---|--|--|---|---|
|              | Prior ASF with vessel ligation                      |   |   |  |  |   | √ |
|              | Prior intradural surgery                            |   |   |  |  |   | √ |
|              | Absence of baseline IONM data, or poor-quality data |   |   |  |  |   | √ |
|              | Hematocrit <28                                      |   |   |  |  |   | √ |
|              | Higher ASA class                                    |   |   |  |  |   | √ |
|              | Lack of preoperative HGT in an appropriate patient  |   |   |  |  |   | √ |
|              | Prior fusion                                        |   |   |  |  |   | √ |
|              | Intraoperative adjustment/movement of patient       |   |   |  |  |   | √ |
| Radiographic | Coronal DAR                                         | M |   |  |  |   | √ |
|              | Sagittal DAR                                        | U |   |  |  |   | √ |
|              | Cobb curve                                          |   | U |  |  |   |   |
|              | Curve magnitude                                     |   |   |  |  | M | √ |
|              | Total DAR                                           |   |   |  |  |   | √ |

|                                    |  |  |  |  |  |  |   |
|------------------------------------|--|--|--|--|--|--|---|
| Scoliosis with hyperkyphosis       |  |  |  |  |  |  | √ |
| Bayoneted spine                    |  |  |  |  |  |  | √ |
| High rate of deformity progression |  |  |  |  |  |  | √ |
| Type 2 spinal cord shape           |  |  |  |  |  |  | √ |
| Type 3 spinal cord shape           |  |  |  |  |  |  | √ |
| Structural curve                   |  |  |  |  |  |  | √ |

3CO = 3 column osteotomy; ASIA = American Spinal Cord Injury Association; AIS = ASIA Impairment Scale; BMI = Body mass index; CCI = Charlson Comorbidity Index; DAR = deformity angular ratio; ICD-9 = International Classification of Diseases, Ninth Revision; OPLL = ossification of posterior longitudinal ligament; SCI = Spinal cord injury; SCIM = Spinal Cord Independence Measure.

\* U represents factors explored only in univariate analyses; M represents factors explored at the multivariable level. Checkmarks indicate factors considered amongst a consensus survey.

† Kim 2021 defines new neurological deficits as “any new limb motor or sensory neurological deficits observed immediately post-operation”. No further details given.

‡ Authors report that a neuromonitoring alert was defined as a reduction in amplitude of 50% or more in SSEPs and/or tcMEPs, but that increases in response latency were not included based on prior literature suggesting that it was not an independent sign of neurological injury in spine surgery.

§ Article included for context. Reports survey consensus amongst 15 experts and is not a patient-based multivariable assessment of factors associated with SCI. Checkmarks indicate all risk factors considered.

**Table 9: Summary of Effect Estimates for Risk Factors for Intra-operative SCI in Studies Using Multivariable Analysis.**

| Prognostic Factor  | Number of Studies (Number of patients)                                                                                                                                                                                                                                                                                                                                                                                                                 |
|--------------------|--------------------------------------------------------------------------------------------------------------------------------------------------------------------------------------------------------------------------------------------------------------------------------------------------------------------------------------------------------------------------------------------------------------------------------------------------------|
|                    | Factor details: OR (95% CI)                                                                                                                                                                                                                                                                                                                                                                                                                            |
| <b>Demographic</b> |                                                                                                                                                                                                                                                                                                                                                                                                                                                        |
| Age                | <p><b>Deformity</b></p> <p>Fehlings, 2018 (N=272)</p> <p>Age (per 10 years): OR=1.53 (95% CI 1.13 to 2.06), p=0.05</p> <p>Mean age: 56.8 ± 15.4 years</p> <p>Zhang, 2017 (N=62)</p> <p>Age (≥18 vs. &lt;18 years): OR=8.27 (95% CI 1.17 to 58.71), p=0.035</p> <p>Mean age: 16.3 ± 6.4 years</p> <p><b>Mixed</b></p> <p>Chen, 2012 (N=316)</p> <p>Age (continuous*): OR=1.08 (95% CI 1.03 to 1.13), p&lt;0.001</p> <p>Mean age: 43.15 ± 6.47 years</p> |

|              |                                                                                                                                                                                                                                                                                                                                |
|--------------|--------------------------------------------------------------------------------------------------------------------------------------------------------------------------------------------------------------------------------------------------------------------------------------------------------------------------------|
|              | <p>Romero-Muñoz, 2019 (N=1282)</p> <p>Age (continuous*): OR=1.004 (95% CI 0.98 to 1.03), p=0.759</p> <p>Median age (IQR): 58 (45 to 69) years</p> <p><b>Degeneration</b></p> <p>Kim, 2021 (N=210)</p> <p>Age (continuous*): OR=0.97 (95% CI 0.89 to 1.05), p=0.446</p> <p>Mean age: 57 ± 12.2 vs. 58 ±12 years<sup>§</sup></p> |
| Sex          | <p><b>Mixed</b></p> <p>Chen, 2012 (N=316)</p> <p>Sex (male vs. female): OR= 5.22 (95% CI 1.86 to 14.62), p=0.002</p> <p><b>Degeneration</b></p> <p>Kim, 2021 (N=196)</p> <p>Sex (male vs. female): OR=1.378 (95% CI 0.33 to 5.79), p=0.661</p>                                                                                 |
| Hypertension | <b>Mixed</b>                                                                                                                                                                                                                                                                                                                   |

|             |                                                                                                                                                                                                                                                 |
|-------------|-------------------------------------------------------------------------------------------------------------------------------------------------------------------------------------------------------------------------------------------------|
|             | <p>Chen, 2012 (N=316)</p> <p>Hypertension (yes vs. no): OR=15.18 (95% CI 4.50 to 51.17), p&lt;0.001</p> <p>Romero-Muñoz, 2019 (N=1282)</p> <p>Hypertension (yes vs. no): OR=1.47 (95% CI 0.56 to 3.86), p=0.436</p>                             |
| Diabetes    | <p><b>Mixed</b></p> <p>Romero-Muñoz, 2019 (N=1282)</p> <p>Diabetes mellitus (yes vs. no): OR=0.70 (95% CI 0.20 to 2.38), p=0.562</p>                                                                                                            |
| BMI/Obesity | <p><b>Mixed</b></p> <p>Romero-Muñoz, 2019 (N=1282)</p> <p>Obesity (yes vs. no): OR=0.52 (95% CI 0.16 to 1.69), p=0.276</p> <p><b>Degeneration</b></p> <p>Kim, 2021 (n=196)</p> <p>BMI (continuous*): OR=1.11 (95% CI 0.96 to 1.29), p=0.154</p> |
| Depression  | <p><b>Mixed</b></p> <p>Romero-Muñoz, (N=1282)</p> <p>Depression (yes vs. no): OR=2.69 (95% CI 0.95 to 7.59), p=0.061</p>                                                                                                                        |

|                                      |                                                                                                                                                                                                                                                                                 |
|--------------------------------------|---------------------------------------------------------------------------------------------------------------------------------------------------------------------------------------------------------------------------------------------------------------------------------|
| CCI score                            | <p><b>Degeneration</b></p> <p>Kim, 2021 (n=196)</p> <p>CCI score (categorical, 0, 1, 2, or <math>\geq 3</math>; lower vs. higher): OR=1.02 (95% CI 0.49 to 2.14), p=0.953</p>                                                                                                   |
| Dyslipidemia                         | <p><b>Mixed</b></p> <p>Romero-Muñoz, (N=1282)</p> <p>Dyslipidemia (yes vs. no): OR=0.48 (95% CI 0.16 to 1.47), p=0.197</p>                                                                                                                                                      |
| Pulmonary Function                   | <p><b>Deformity</b></p> <p>Zhang, 2017 (N=62).</p> <p>Pulmonary Function (abnormal vs. normal): OR=2.10 (95% CI 0.99 to 4.48), p=0.054</p>                                                                                                                                      |
| <b>Clinical</b>                      |                                                                                                                                                                                                                                                                                 |
| Preoperative AIS/Neurological status | <p><b>Deformity</b></p> <p>Zhang, 2017 (N=62)</p> <p>Pre-operative neurological status (normal vs abnormal): OR=NR, p&gt;0.05</p> <p><b>Mixed</b></p> <p>Chen, 2012 (N=316)</p> <p>Pre-operative AIS status (A-D; better vs. worse): OR=0.35 (95% CI 0.18 to 0.66), p=0.001</p> |

|                                                                                                                                                                                                                                                             |                                                                                                                                                                                                                                                                                                                                                                                                                |
|-------------------------------------------------------------------------------------------------------------------------------------------------------------------------------------------------------------------------------------------------------------|----------------------------------------------------------------------------------------------------------------------------------------------------------------------------------------------------------------------------------------------------------------------------------------------------------------------------------------------------------------------------------------------------------------|
| <p>1<br/>2<br/>3<br/>4<br/>5<br/>6<br/>7<br/>8<br/>9<br/>10<br/>11<br/>12<br/>13</p> <p>Combined<br/><br/>Myelopathy</p>                                                                                                                                    | <p><b>Degeneration</b></p> <p>Kim, 2021 (N=196)</p> <p>Combined myelopathy prior to surgery (yes vs. no): OR=8.24 (95% CI 1.57 to 43.38),<br/>p=0.013</p>                                                                                                                                                                                                                                                      |
| <p>14<br/>15<br/>16<br/>17<br/>18<br/>19<br/>20<br/>21<br/>22<br/>23<br/>24<br/>25<br/>26<br/>27<br/>28<br/>29<br/>30<br/>31<br/>32<br/>33<br/>34<br/>35<br/>36<br/>37<br/>38<br/>39<br/>40<br/>41<br/>42<br/>43<br/>44<br/>45<br/>46</p> <p>Blood loss</p> | <p><b>Deformity</b></p> <p>Fehlings, 2018 (N=265)</p> <p>Estimated blood loss (per 500 cc): OR=1.06 (95% CI 0.97 to 1.15), p=0.179</p> <p>Zhang, 2017 (N=62).</p> <p>Estimated blood loss<sup>†</sup> (&gt;50% vs. &lt;50%): OR=3.05 (95% CI 1.16 to 8.05), p=0.024</p> <p><b>Degeneration</b></p> <p>Kim, 2021 (N=196)</p> <p>Estimated blood loss (continuous*): OR=1.00 (95% CI 0.99 to 1.002), p=0.862</p> |
| <p>47<br/>48<br/>49</p> <p><b>Surgical</b></p>                                                                                                                                                                                                              |                                                                                                                                                                                                                                                                                                                                                                                                                |
| <p>50<br/>51<br/>52<br/>53<br/>54<br/>55</p> <p>Number of spinal<br/><br/>levels</p>                                                                                                                                                                        | <p><b>Deformity</b></p> <p>Fehlings, 2018 (N=265)</p>                                                                                                                                                                                                                                                                                                                                                          |



|                                   |                                                                                                                                                                                                                                                                                                                                                                                                   |
|-----------------------------------|---------------------------------------------------------------------------------------------------------------------------------------------------------------------------------------------------------------------------------------------------------------------------------------------------------------------------------------------------------------------------------------------------|
|                                   | <p>Number of spinal levels involved (per 1 level): OR=1.08 (95% CI 0.99 to 1.17), p=0.091</p> <p><b>Degeneration</b></p> <p>Kim, 2021 (N=196)</p> <p>Number of levels fused (1 to 2 vs. <math>\geq 3</math>): OR=1.36 (95% CI 0.59 to 3.11), p=0.470</p> <p><b>Mixed</b></p> <p>Chen, 2012 (N=316)</p> <p>Number of involved segments (more vs. less): OR=3.28 (95% CI 1.55 to 6.92), p=0.002</p> |
| Operation type                    | <p><b>Degeneration</b></p> <p>Kim, 2021 (N=196)</p> <p>Operation type (emergency vs. elective): OR=0.00 (95% CI NR), p=0.999</p>                                                                                                                                                                                                                                                                  |
| Operation time                    | <p><b>Degeneration</b></p> <p>Kim, 2021 (N=196)</p> <p>Operation time (continuous*): OR=1.004 (95% CI 0.99 to 1.01), p=0.238</p>                                                                                                                                                                                                                                                                  |
| Use of intra-operative monitoring | <p><b>Degeneration</b></p> <p>Kim, 2021 (N=196)</p>                                                                                                                                                                                                                                                                                                                                               |

|                                        |                                                                                                                                            |
|----------------------------------------|--------------------------------------------------------------------------------------------------------------------------------------------|
|                                        | Use of intra-operative neuromonitoring (yes vs. no): OR=0.14 (95% CI 0.04 to 0.52),<br>p=0.003                                             |
| Lumbar-level<br>osteotomy              | <b>Deformity</b><br><br>Fehlings, 2018 (N=265)<br><br>Lumbar-level osteotomy (yes vs. no): OR=3.30 (95% CI 1.18 to 9.17), p=0.022          |
| Ponte-osteotomy                        | <b>Deformity*</b><br><br>Buckland, 2018 (N=2210)<br><br>Ponte osteotomy (yes vs. no): OR=NR, p<0.001                                       |
| Prevalence of 3<br>column<br>osteotomy | <b>Deformity</b><br><br>Fehlings, 2018 (N=265)<br><br>Prevalence of 3CO (yes vs. no): OR=2.16 (95% CI 0.77 to 6.08), p=0.143               |
| <b>Radiographic</b>                    |                                                                                                                                            |
| Coronal<br>Deformity<br>Angular Ratio  | <b>Deformity</b><br><br>Fehlings, 2018 (N=265)<br><br>Coronal deformity angular ratio (per 1 unit): OR=1.10 (95% CI 1.01 to 1.19), p=0.037 |
| Curve Magnitude                        | <b>Deformity*</b><br><br>Buckland, 2018 (N=2210)<br><br>Curve magnitude (continuous*) OR=NR, p<0.001                                       |

1  
2  
3  
4  
5 3CO = 3 Column Osteotomy; CCI = Charlson Comorbidity Index; IQR = Interquartile range; OR = odds  
6 ratio; CI = confidence interval; AIS = ASIA Impairment Scale; BMI = body mass index; NR = not  
7 reported  
8  
9

10  
11  
12  
13 \* Authors do not report details, variable is assumed to be continuous.  
14

15  
16 † EBL, the ratio between circulating and lost blood  
17

18  
19 ‡ Risk factors for intra-operative neuromonitoring defined as a reduction in amplitude of 50% or more in  
20 SSEPs and/or tcMEPs. Increases in response latency were not included based on prior literature  
21 suggesting that it was not an independent sign of neurological injury in spine surgery.  
22  
23

24  
25  
26 § Represents patients that received intra-operative monitoring group vs. patients that did not receive intra-  
27 operative monitoring.  
28  
29

1  
2  
3  
4  
5  
6  
7  
8  
9  
10  
11  
12  
13  
14  
15  
16  
17  
18  
19  
20  
21  
22  
23  
24  
25  
26  
27  
28  
29  
30  
31  
32  
33  
34  
35  
36  
37  
38  
39  
40  
41  
42  
43  
44  
45  
46  
47

**Table 10: Strength of evidence (SOE) table assessing risk factors for intra-operative SCI in prognostic studies.**

| Prognostic factors | No. Studies (no. patients)                                   | Overall Quality | Conclusions*                                                                               | Study Limitations | Serious Inconsistency | Serious Indirectness | Serious Imprecision | Publication Bias |
|--------------------|--------------------------------------------------------------|-----------------|--------------------------------------------------------------------------------------------|-------------------|-----------------------|----------------------|---------------------|------------------|
| <b>Demographic</b> |                                                              |                 |                                                                                            |                   |                       |                      |                     |                  |
| Age                | <b>Deformity</b><br>2 (N=327)<br>Fehlings 2018<br>Zhang 2017 | MODERATE        | <b>Deformity</b><br>Increasing age was associated with increased odds of experiencing ISCI | Low               | Unknown <sup>†</sup>  | No                   | No                  | Unknown          |
|                    | <b>Mixed</b><br>2 (N=1,598)<br>Chen 2012                     | LOW             | <b>Mixed</b><br>Increasing age was associated with increased odds in one                   | Moderate          | No                    | No                   | No                  | Unknown          |

|     |                                                      |          |                                                                                                     |      |         |    |     |         |
|-----|------------------------------------------------------|----------|-----------------------------------------------------------------------------------------------------|------|---------|----|-----|---------|
|     | Romero-<br>Muñoz 2019                                |          | study; no association in<br>a second, larger study                                                  |      |         |    |     |         |
|     | <b>Degeneration</b><br><br>1 (N=196)<br><br>Kim 2021 | VERY LOW | <b>Degeneration</b><br><br>Age was not associated<br>with increased odds of<br>experiencing an ISCI | High | Unknown | No | No  | Unknown |
| Sex | <b>Mixed</b><br><br>1 (N=316)<br><br>Chen 2012       | LOW      | <b>Mixed</b><br><br>Males had increased<br>odds of experiencing<br>an ISCI                          | Low  | Unknown | No | Yes | Unknown |
|     | <b>Degeneration</b><br><br>1 (N=196)                 | VERY LOW | <b>Degeneration</b>                                                                                 | High | Unknown | No | Yes | Unknown |

1  
2  
3  
4  
5  
6  
7  
8  
9  
10  
11  
12  
13  
14  
15  
16  
17  
18  
19  
20  
21  
22  
23  
24  
25  
26  
27  
28  
29  
30  
31  
32  
33  
34  
35  
36  
37  
38  
39  
40  
41  
42  
43  
44  
45  
46  
47

|              |                                                                               |     |                                                                                                                                                                                                                                              |          |     |    |     |         |
|--------------|-------------------------------------------------------------------------------|-----|----------------------------------------------------------------------------------------------------------------------------------------------------------------------------------------------------------------------------------------------|----------|-----|----|-----|---------|
|              | Kim 2021                                                                      |     | Sex was not associated with increased odds of experiencing an ISCI                                                                                                                                                                           |          |     |    |     |         |
| Hypertension | <b>Mixed</b><br><br>2 (N=1,598)<br><br>Chen 2012<br><br>Romero-<br>Muñoz 2019 | LOW | <b>Mixed</b><br><br>Hypertension was not associated with increased odds of experiencing an ISCI in a larger study; hypertension was associated with a large increase in odds in a second study, but confidence intervals were extremely wide | Moderate | Yes | No | Yes | Unknown |

|             |                                                                                      |          |                                                                                                                     |          |         |    |     |         |
|-------------|--------------------------------------------------------------------------------------|----------|---------------------------------------------------------------------------------------------------------------------|----------|---------|----|-----|---------|
| Diabetes    | <b>Mixed</b><br><br>1 (N=1,282)<br><br>Romero-<br><br>Muñoz 2019                     | LOW      | <b>Mixed</b><br><br>Diabetes was not<br><br>associated with<br><br>increased odds of<br><br>experiencing an ISCI    | Moderate | Unknown | No | No  | Unknown |
| BMI/Obesity | <b>Mixed</b><br><b>(obesity)</b><br><br>1 (N=1,282)<br><br>Romero-<br><br>Muñoz 2019 | LOW      | <b>Mixed</b><br><br>BMI/obesity was not<br><br>associated with<br><br>increased odds of<br><br>experiencing an ISCI | Moderate | Unknown | No | Yes | Unknown |
|             | <b>Degeneration</b><br><b>(BMI)</b>                                                  | VERY LOW | <b>Degeneration</b><br><br>BMI/obesity was not<br><br>associated with                                               | Yes      | Unknown | No | No  | Unknown |

|              |                                                                  |          |                                                                                                                  |          |         |    |     |         |
|--------------|------------------------------------------------------------------|----------|------------------------------------------------------------------------------------------------------------------|----------|---------|----|-----|---------|
|              | 1 (N=196)<br><br>Kim 2021                                        |          | increased odds of experiencing an ISCI                                                                           |          |         |    |     |         |
| Depression   | <b>Mixed</b><br><br>1 (N=1,282)<br><br>Romero-<br><br>Muñoz 2019 | LOW      | <b>Mixed</b><br><br>Depression was not associated with increased odds of experiencing a ISCI                     | Moderate | Unknown | No | Yes | Unknown |
| CCI score    | <b>Degeneration</b><br><br>1 (N=196)<br><br>Kim 2021             | VERY LOW | <b>Degeneration</b><br><br>CCI scores at baseline was not associated with increased odds of experiencing an ISCI | High     | Unknown | No | No  | Unknown |
| Dyslipidemia | <b>Mixed</b><br><br>1 (N=1,282)                                  | LOW      | <b>Mixed</b>                                                                                                     | Moderate | Unknown | No | No  | Unknown |

1  
2  
3  
4  
5  
6  
7  
8  
9  
10  
11  
12  
13  
14  
15  
16  
17  
18  
19  
20  
21  
22  
23  
24  
25  
26  
27  
28  
29  
30  
31  
32  
33  
34  
35  
36  
37  
38  
39  
40  
41  
42  
43  
44  
45  
46  
47



|                                      |                                            |          |                                                                                                            |          |         |    |                          |         |
|--------------------------------------|--------------------------------------------|----------|------------------------------------------------------------------------------------------------------------|----------|---------|----|--------------------------|---------|
|                                      | Romero-<br>Muñoz 2019                      |          | Dyslipidemia was not associated with increased odds of experiencing an ISCI                                |          |         |    |                          |         |
| Pulmonary Function                   | <b>Deformity</b><br>1 (N=62)<br>Zhang 2017 | VERY LOW | <b>Deformity</b><br>Abnormal pulmonary function was associated with increased odds of experiencing an ISCI | Yes      | Unknown | No | Yes                      | Unknown |
| <b>Clinical</b>                      |                                            |          |                                                                                                            |          |         |    |                          |         |
| Preoperative AIS/Neurological status | <b>Deformity</b><br>1 (N=62)<br>Zhang 2017 | VERY LOW | <b>Deformity</b><br>Preoperative neurological status (normal vs. abnormal) was not associated with         | Moderate | Unknown | No | Yes<br>(CI not provided) | Unknown |

1  
2  
3  
4  
5  
6  
7  
8  
9  
10  
11  
12  
13  
14  
15  
16  
17  
18  
19  
20  
21  
22  
23  
24  
25  
26  
27  
28  
29  
30  
31  
32  
33  
34  
35  
36  
37  
38  
39  
40  
41  
42  
43  
44  
45  
46  
47

|                     |                                                            |          |                                                                                                                                            |      |         |    |     |         |
|---------------------|------------------------------------------------------------|----------|--------------------------------------------------------------------------------------------------------------------------------------------|------|---------|----|-----|---------|
|                     |                                                            |          | increased odds of experiencing an ISCI                                                                                                     |      |         |    |     |         |
|                     | <b>Mixed<sup>‡</sup></b><br><br>1 (N=316)<br><br>Chen 2012 | MODERATE | <b>Mixed<sup>‡</sup></b><br><br>Better preoperative AIS was associated with decreased odds of experiencing an ISCI                         | Low  | Unknown | No | No  | Unknown |
| Combined Myelopathy | <b>Degeneration</b><br><br>1 (N=196)<br><br>Kim 2021       | VERY LOW | <b>Degeneration</b><br><br>Presence of compressive myelopathy prior to surgery was associated with a large, increased odds of experiencing | High | Unknown | No | Yes | Unknown |

|                      |                                                                         |          |                                                                                                                                                                                                                                                                                         |     |                      |    |    |         |
|----------------------|-------------------------------------------------------------------------|----------|-----------------------------------------------------------------------------------------------------------------------------------------------------------------------------------------------------------------------------------------------------------------------------------------|-----|----------------------|----|----|---------|
|                      |                                                                         |          | an ISCI; confidence interval was extremely wide                                                                                                                                                                                                                                         |     |                      |    |    |         |
| Estimated blood loss | <b>Deformity</b><br>2 Studies<br>(N=327)<br>Fehlings 2018<br>Zhang 2017 | MODERATE | <b>Deformity</b><br>EBL (per 500 cc) was not associated with increased odds of experiencing an ISCI in the larger, good-quality study; the fair-quality study found EBL $\geq 50\%$ vs. $< 50\%$ (i.e., ratio between circulating and lost blood) was associated with increased odds of | Low | Unknown <sup>s</sup> | No | No | Unknown |

1  
2  
3  
4  
5  
6  
7  
8  
9  
10  
11  
12  
13  
14  
15  
16  
17  
18  
19  
20  
21  
22  
23  
24  
25  
26  
27  
28  
29  
30  
31  
32  
33  
34  
35  
36  
37  
38  
39  
40  
41  
42  
43  
44  
45  
46  
47

|                         |                                                        |          |                                                                                                            |      |         |    |    |         |
|-------------------------|--------------------------------------------------------|----------|------------------------------------------------------------------------------------------------------------|------|---------|----|----|---------|
|                         |                                                        |          | experiencing an ISCI, but confidence interval was wide.                                                    |      |         |    |    |         |
|                         | <b>Degeneration</b><br><br>1 (N=196)<br><br>Kim 2021   | VERY LOW | <b>Degeneration</b><br><br>EBL (continuous) was not associated with increased odds of experiencing an ISCI | High | Unknown | No | No | Unknown |
| <b>Surgical</b>         |                                                        |          |                                                                                                            |      |         |    |    |         |
| Number of spinal levels | <b>Deformity</b><br><br>1 (N=265)<br><br>Fehlings 2018 | MODERATE | <b>Deformity</b><br><br>Number of spinal levels involved (1 per level) was not associated with             | Low  | Unknown | No | No | Unknown |

|  |                                                      |          |                                                                                                                               |      |         |    |     |         |
|--|------------------------------------------------------|----------|-------------------------------------------------------------------------------------------------------------------------------|------|---------|----|-----|---------|
|  |                                                      |          | increased odds of experiencing an ISCI                                                                                        |      |         |    |     |         |
|  | <b>Degeneration</b><br><br>1 (N=196)<br><br>Kim 2021 | VERY LOW | <b>Degeneration</b><br><br>Number of levels fused (continuous) was not associated with increased odds of experiencing an ISCI | High | Unknown | No | Yes | Unknown |
|  | <b>Mixed</b><br><br>1 (N=316)<br><br>Chen 2012       | LOW      | <b>Mixed</b><br><br>Increasing number of involved segments was associated with a large increased odds of                      | Low  | Unknown | No | Yes | Unknown |

1  
2  
3  
4  
5  
6  
7  
8  
9  
10  
11  
12  
13  
14  
15  
16  
17  
18  
19  
20  
21  
22  
23  
24  
25  
26  
27  
28  
29  
30  
31  
32  
33  
34  
35  
36  
37  
38  
39  
40  
41  
42  
43  
44  
45  
46  
47

|                           |                                                             |          |                                                                                                                                                                         |      |         |    |                                    |         |
|---------------------------|-------------------------------------------------------------|----------|-------------------------------------------------------------------------------------------------------------------------------------------------------------------------|------|---------|----|------------------------------------|---------|
|                           |                                                             |          | experiencing an ISCI,<br>but the confidence<br>interval was wide                                                                                                        |      |         |    |                                    |         |
| Lumbar-level<br>osteotomy | <b>Deformity</b><br>1 (N=265)<br><br>Fehlings 2018          | LOW      | <b>Deformity</b><br><br>Lumbar-level<br>osteotomy was<br>associated with large<br>increased odds of<br>experiencing an ISCI,<br>but the confidence<br>interval was wide | Low  | Unknown | No | Yes                                | Unknown |
| Ponte-<br>osteotomy       | <b>Deformity</b><br>1 (N=2,210)<br><br>Buckland<br><br>2018 | VERY LOW | <b>Deformity</b><br><br>Ponte-osteotomy was<br>associated with                                                                                                          | High | Unknown | No | Yes<br><br>(OR/CI not<br>provided) | Unknown |

|                   |                                                |          |                                                                                                                                         |      |         |    |                          |         |
|-------------------|------------------------------------------------|----------|-----------------------------------------------------------------------------------------------------------------------------------------|------|---------|----|--------------------------|---------|
|                   |                                                |          | increased odds of an IONM alert                                                                                                         |      |         |    |                          |         |
| Prevalence of 3CO | <b>Deformity</b><br>1 (N=265)<br>Fehlings 2018 | LOW      | <b>Deformity</b><br>3-column osteotomy was not associated with increased odds of experiencing an ISCI; the confidence interval was wide | Low  | Unknown | No | Yes                      | Unknown |
| Operation type    | <b>Degeneration</b><br>1 (N=196)<br>Kim 2021   | VERY LOW | <b>Degeneration</b><br>Operation type (emergency vs. elective) was not associated with                                                  | High | Unknown | No | Yes<br>(CI not provided) | Unknown |

1  
2  
3  
4  
5  
6  
7  
8  
9  
10  
11  
12  
13  
14  
15  
16  
17  
18  
19  
20  
21  
22  
23  
24  
25  
26  
27  
28  
29  
30  
31  
32  
33  
34  
35  
36  
37  
38  
39  
40  
41  
42  
43  
44  
45  
46  
47

|                                   |                                                      |          |                                                                                                                                   |      |         |    |    |         |
|-----------------------------------|------------------------------------------------------|----------|-----------------------------------------------------------------------------------------------------------------------------------|------|---------|----|----|---------|
|                                   |                                                      |          | increased odds of experiencing an ISCI                                                                                            |      |         |    |    |         |
| Operation time                    | <b>Degeneration</b><br><br>1 (N=196)<br><br>Kim 2021 | VERY LOW | <b>Degeneration</b><br><br>Operation time (continuous) was not associated with increased odds of experiencing an ISCI             | High | Unknown | No | No | Unknown |
| Use of intra-operative monitoring | <b>Degeneration</b><br><br>1 (N=196)<br><br>Kim 2021 | VERY LOW | <b>Degeneration</b><br><br>Use of intra-operative monitoring was associated with a large decrease in odds of experiencing an ISCI | High | Unknown | No | No | Unknown |
| <b>Radiographic</b>               |                                                      |          |                                                                                                                                   |      |         |    |    |         |



|                 |                                                          |          |                                                                                                                       |      |         |    |                                 |         |
|-----------------|----------------------------------------------------------|----------|-----------------------------------------------------------------------------------------------------------------------|------|---------|----|---------------------------------|---------|
| Coronal DAR     | <b>Deformity</b><br><br>1 (N=265)<br><br>Fehlings 2018   | MODERATE | <b>Deformity</b><br><br>Coronal DAR (per 1 unit) was associated with increased odds of experiencing an ISCI           | Low  | Unknown | No | No                              | Unknown |
| Curve Magnitude | <b>Deformity</b><br><br>1 (N=2,210)<br><br>Buckland 2018 | VERY LOW | <b>Deformity</b><br><br>Curve magnitude (coronal and sagittal Cobb) was associated with increased odds of IONM alerts | High | Unknown | No | Yes<br><br>(OR/CI not provided) | Unknown |

3CO = 3 Column Osteotomy; CCI = Charlson Comorbidity Index; CI = confidence interval; DAR = Deformity Angular Ratio; OR = odds ratio

\* Conclusions addressed association between prognostic factor and increased risk of intra-operative/immediate postoperative neurological deficit or decline (measured via ASIA grade) in all studies except for Buckland 2018 which evaluated the association is between the factor and the risk of intra-operative monitoring alerts.

1  
2  
3  
4 † Age modeled differently: Fehlings et al. evaluated age per 10-year increments and Zhang et al. evaluated age dichotomized into  $\geq 18$  vs.  $< 18$   
5  
6 years. Also, the mean age of the study populations differed: 56.8 years (SD 15.4, range 18–81) for Fehlings et al. and 16.3 years (SD 6.4, range 6–  
7  
8 46 years) for Zhang et al.

9  
10  
11 ‡ Large proportion (almost 50%) of patients had AIS grade B.

12  
13  
14 § Different ways of measuring estimated blood loss in the two studies: per 500 cc (Fehlings et al.) and as the ratio between circulating and lost  
15  
16 blood dichotomized into  $\geq 50\%$  vs.  $< 50\%$  (Zhang et al.). Populations also appear to be different.  
17  
18  
19  
20  
21  
22  
23  
24  
25  
26  
27  
28  
29  
30  
31  
32  
33  
34  
35  
36  
37  
38  
39  
40  
41  
42  
43  
44  
45  
46  
47

**Table 11: Factors which increase the risk for intra-operative spinal cord injury.**

|                                                                                   |
|-----------------------------------------------------------------------------------|
| High Risk Deformity: Rigid Thoracic Curve with High deformity Angular Ratio (DAR) |
| Revision Congenital Deformity with Significant Cord Compression & Myelopathy      |
| Extrinsic Lesion with Cord Compression & Myelopathy                               |
| Intramedullary Tumor                                                              |
| Unstable Fractures: B/L Facet Dislocation and Disc Herniation                     |
| Extension Distraction Injury with Ankylosing Spondylitis                          |
| OPLL with severe cord compression and moderate to severe myelopathy               |

1  
2  
3  
4  
5 **Appendix A. Excluded studies.**  
6

7 **List of Select Excluded Studies and Rationale**  
8

9

|                                                                                              | Citation                                                                                                                                                                                                                                                                                                             | Reason for exclusion                                                                                                  |
|----------------------------------------------------------------------------------------------|----------------------------------------------------------------------------------------------------------------------------------------------------------------------------------------------------------------------------------------------------------------------------------------------------------------------|-----------------------------------------------------------------------------------------------------------------------|
| 10<br>11<br>12<br>13<br>14<br>15<br>16                                                       | 1 Ahn H, Fehlings MG. Prevention, identification, and treatment of perioperative spinal cord injury. <i>Neurosurg Focus</i> . 2008;25(5):E15. doi: 10.3171/FOC.2008.25.11.E15. PMID: 18980475.                                                                                                                       | Does not use multivariable regression to assess risk factors                                                          |
| 17<br>18<br>19<br>20<br>21<br>22<br>23<br>24                                                 | 2 Alosch H, Parker SL, McGirt MJ, Gokaslan ZL, Witham TF, Bydon A, Wolinsky JP, Sciubba DM. Preoperative radiographic factors and surgeon experience are associated with cortical breach of C2 pedicle screws. <i>J Spinal Disord Tech</i> . 2010 Feb;23(1):9-14. doi: 10.1097/BSD.0b013e318194e746. PMID: 20068474. | Does not use multivariable regression to assess risk factors                                                          |
| 25<br>26<br>27<br>28<br>29<br>30<br>31                                                       | 3 Bejjani GK, Nora PC, Vera PL, Broemling L, Sekhar LN. The predictive value of intraoperative somatosensory evoked potential monitoring: review of 244 procedures. <i>Neurosurgery</i> . 1998 Sep;43(3):491-8; discussion 498-500. doi: 10.1097/00006123-199809000-00050. PMID: 9733304.                            | Ineligible study design for Key Question, e.g., case series, modeling (e.g., prediction models, thresholds/ROC, etc.) |
| 32<br>33<br>34<br>35<br>36<br>37<br>38<br>39<br>40<br>41<br>42<br>43<br>44<br>45<br>46<br>47 | 4 Bridwell KH, Lenke LG, Baldus C, Blanke K. Major intraoperative neurologic deficits in pediatric and adult spinal deformity patients. Incidence and etiology at one institution. <i>Spine (Phila Pa 1976)</i> . 1998 Feb 1;23(3):324-31. doi: 10.1097/00007632-199802010-00008. PMID: 9507620.                     | Does not use multivariable regression to assess risk factors                                                          |

|   |                                                                                                                                                                                                                                                                                                                                                                                                                             |                                                              |
|---|-----------------------------------------------------------------------------------------------------------------------------------------------------------------------------------------------------------------------------------------------------------------------------------------------------------------------------------------------------------------------------------------------------------------------------|--------------------------------------------------------------|
| 5 | Chen J, Shao XX, Sui WY, Yang JF, Deng YL, Xu J, Huang ZF, Yang JL. Risk factors for neurological complications in severe and rigid spinal deformity correction of 177 cases. <i>BMC Neurol.</i> 2020 Nov 28;20(1):433. doi: 10.1186/s12883-020-02012-8. PMID: 33246421; PMCID: PMC7697368.                                                                                                                                 | Does not use multivariable regression to assess risk factors |
| 6 | Clark AJ, Ziewacz JE, Safaee M, Lau D, Lyon R, Chou D, Weinstein PR, Ames CP, Clark JP 3rd, Mummaneni PV. Intraoperative neuromonitoring with MEPs and prediction of postoperative neurological deficits in patients undergoing surgery for cervical and cervicothoracic myelopathy. <i>Neurosurg Focus.</i> 2013 Jul;35(1):E7. doi: 10.3171/2013.4.FOCUS13121. PMID: 23815252.                                             | Does not use multivariable regression to assess risk factors |
| 7 | De la Garza Ramos R, Goodwin CR, Abu-Bonsrah N, Jain A, Miller EK, Huang N, Kebaish KM, Sponseller PD, Sciubba DM. Patient and operative factors associated with complications following adolescent idiopathic scoliosis surgery: an analysis of 36,335 patients from the Nationwide Inpatient Sample. <i>J Neurosurg Pediatr.</i> 2016 Dec;25(6):730-736. doi: 10.3171/2016.6.PEDS16200. Epub 2016 Aug 26. PMID: 27564784. | Ineligible population                                        |
| 8 | Feng B, Qiu G, Shen J, Zhang J, Tian Y, Li S, Zhao H, Zhao Y. Impact of multimodal intraoperative monitoring during surgery for spine deformity and potential risk factors for neurological monitoring changes. <i>J Spinal Disord Tech.</i> 2012 Jun;25(4):E108-14. doi: 10.1097/BSD.0b013e31824d2a2f. PMID: 22367467.                                                                                                     | Does not use multivariable regression to assess risk factors |

|    |                                                                                                                                                                                                                                                                                                                                                                                              |                                                                                                                                              |
|----|----------------------------------------------------------------------------------------------------------------------------------------------------------------------------------------------------------------------------------------------------------------------------------------------------------------------------------------------------------------------------------------------|----------------------------------------------------------------------------------------------------------------------------------------------|
| 9  | Ghadirpour R, Nasi D, Iaccarino C, Romano A, Motti L, Sabadini R, Valzania F, Servadei F. Intraoperative neurophysiological monitoring for intradural extramedullary spinal tumors: predictive value and relevance of D-wave amplitude on surgical outcome during a 10-year experience. <i>J Neurosurg Spine</i> . 2018 Nov 9;30(2):259-267. doi: 10.3171/2018.7.SPINE18278. PMID: 30497134. | Ineligible study design for Key Question, e.g., case series, modeling (e.g., prediction models, thresholds/ROC, etc.)                        |
| 10 | Glennie RA, Ailon T, Yang K, Batke J, Fisher CG, Dvorak MF, Vaccaro AR, Fehlings MG, Arnold P, Harrop JS, Street JT. Incidence, impact, and risk factors of adverse events in thoracic and lumbar spine fractures: an ambispective cohort analysis of 390 patients. <i>Spine J</i> . 2015 Apr 1;15(4):629-37. doi: 10.1016/j.spinee.2014.11.016. Epub 2014 Nov 28. PMID: 25450658.           | Ineligible study design for Key Question, e.g., case series, modeling (e.g., prediction models, thresholds/ROC, etc.)                        |
| 11 | Guest JD, Vanni S, Silbert L. Mild hypothermia, blood loss and complications in elective spinal surgery. <i>Spine J</i> . 2004 Mar-Apr;4(2):130-7. doi: 10.1016/j.spinee.2003.08.027. PMID: 15016389.                                                                                                                                                                                        | Does not use multivariable regression to assess risk factors                                                                                 |
| 12 | Huang ZF, Chen L, Yang JF, Deng YL, Sui WY, Yang JL. Multimodality Intraoperative Neuromonitoring in Severe Thoracic Deformity Posterior Vertebral Column Resection Correction. <i>World Neurosurg</i> . 2019 Jul;127:e416-e426. doi: 10.1016/j.wneu.2019.03.140. Epub 2019 Apr 11. PMID: 30981802.                                                                                          | Does not use multivariable regression to assess risk factors                                                                                 |
| 13 | Kashkoush A, Mehta A, Agarwal N, Nwachuku EL, Fields DP, Alan N, Kanter AS, Okonkwo DO, Hamilton DK, Thirumala PD. Perioperative Neurological Complications Following Anterior Cervical Discectomy and Fusion: Clinical Impact on 317,789 Patients from the National Inpatient Sample. <i>World Neurosurg</i> . 2019                                                                         | Ineligible study design for Key Question, e.g., case series, modeling (e.g., prediction models, thresholds/ROC, etc.), ineligible population |

|    |                                                                                                                                                                                                                                                                                                                                                                                                                                                                                                  |                                                              |
|----|--------------------------------------------------------------------------------------------------------------------------------------------------------------------------------------------------------------------------------------------------------------------------------------------------------------------------------------------------------------------------------------------------------------------------------------------------------------------------------------------------|--------------------------------------------------------------|
|    | Aug;128:e107-e115. doi: 10.1016/j.wneu.2019.04.037. Epub 2019 Apr 10. PMID: 30980979.                                                                                                                                                                                                                                                                                                                                                                                                            |                                                              |
| 14 | Kato S, Fehlings MG, Lewis SJ, Lenke LG, Shaffrey CI, Cheung KMC, Carreon LY, Dekutoski MB, Schwab FJ, Boachie-Adjei O, Kebaish KM, Ames CP, Qiu Y, Matsuyama Y, Dahl BT, Mehdian H, Pellisé F, Berven SH. An Analysis of the Incidence and Outcomes of Major Versus Minor Neurological Decline After Complex Adult Spinal Deformity Surgery: A Subanalysis of Scolio-RISK-1 Study. <i>Spine (Phila Pa 1976)</i> . 2018 Jul 1;43(13):905-912. doi: 10.1097/BRS.0000000000002486. PMID: 29894429. | Does not use multivariable regression to assess risk factors |
| 15 | Kelly MP, Lenke LG, Godzik J, Pellise F, Shaffrey CI, Smith JS, Lewis SJ, Ames CP, Carreon LY, Fehlings MG, Schwab F, Shimer AL. Retrospective analysis underestimates neurological deficits in complex spinal deformity surgery: a Scolio-RISK-1 Study. <i>J Neurosurg Spine</i> . 2017 Jul;27(1):68-73. doi: 10.3171/2016.12.SPINE161068. Epub 2017 May 5. PMID: 28475019.                                                                                                                     | Does not use multivariable regression to assess risk factors |
| 16 | Kim DH, Zaremski J, Kwon B, Jenis L, Woodard E, Bode R, Banco RJ. Risk factors for false positive transcranial motor evoked potential monitoring alerts during surgical treatment of cervical myelopathy. <i>Spine (Phila Pa 1976)</i> . 2007 Dec 15;32(26):3041-6. doi: 10.1097/BRS.0b013e31815d0072. PMID: 18091499.                                                                                                                                                                           | Does not use multivariable regression to assess risk factors |
| 17 | Lee JY, Hilibrand AS, Lim MR, Zavatsky J, Zeiller S, Schwartz DM, Vaccaro AR, Anderson DG, Albert TJ. Characterization of neurophysiologic alerts during anterior                                                                                                                                                                                                                                                                                                                                | Does not use multivariable regression to assess risk factors |

|    |                                                                                                                                                                                                                                                                                                                                                                                                                                               |                                                              |
|----|-----------------------------------------------------------------------------------------------------------------------------------------------------------------------------------------------------------------------------------------------------------------------------------------------------------------------------------------------------------------------------------------------------------------------------------------------|--------------------------------------------------------------|
|    | cervical spine surgery. <i>Spine (Phila Pa 1976)</i> . 2006 Aug 1;31(17):1916-22. doi: 10.1097/01.brs.0000228724.01795.a2. PMID: 16924208.                                                                                                                                                                                                                                                                                                    |                                                              |
| 18 | Lenke LG, Fehlings MG, Shaffrey CI, Cheung KM, Carreon L, Dekutoski MB, Schwab FJ, Boachie-Adjei O, Kebaish KM, Ames CP, Qiu Y, Matsuyama Y, Dahl BT, Mehdian H, Pellisé-Urquiza F, Lewis SJ, Berven SH. Neurologic Outcomes of Complex Adult Spinal Deformity Surgery: Results of the Prospective, Multicenter Scolio-RISK-1 Study. <i>Spine (Phila Pa 1976)</i> . 2016 Feb;41(3):204-12. doi: 10.1097/BRS.0000000000001338. PMID: 26866736. | Does not use multivariable regression to assess risk factors |
| 19 | Lewis ND, Keshen SG, Lenke LG, Zywiell MG, Skaggs DL, Dear TE, Strantzas S, Lewis SJ. The Deformity Angular Ratio: Does It Correlate With High-Risk Cases for Potential Spinal Cord Monitoring Alerts in Pediatric 3-Column Thoracic Spinal Deformity Corrective Surgery? <i>Spine (Phila Pa 1976)</i> . 2015 Aug 1;40(15):E879-85. doi: 10.1097/BRS.0000000000000984. PMID: 26222664.                                                        | Does not use multivariable regression to assess risk factors |
| 20 | Lewis SJ, Gray R, Holmes LM, Strantzas S, Jhaveri S, Zaarour C, Magana S. Neurophysiological changes in deformity correction of adolescent idiopathic scoliosis with intraoperative skull-femoral traction. <i>Spine (Phila Pa 1976)</i> . 2011 Sep 15;36(20):1627-38. doi: 10.1097/BRS.0b013e318216124e. PMID: 21897186.                                                                                                                     | Does not use multivariable regression to assess risk factors |
| 21 | Montalva-Iborra A, Alcanyis-Alberola M, Grao-Castellote C, Torralba-Collados F, Giner-Pascual M. Risk factors in iatrogenic spinal cord injury. <i>Spinal Cord</i> . 2017 Sep;55(9):818-822. doi: 10.1038/sc.2017.21. Epub 2017 Apr 4. PMID: 28374810.                                                                                                                                                                                        | Does not use multivariable regression to assess risk factors |



|    |                                                                                                                                                                                                                                                                                                                                                                                                                                                                                                                                           |                                                              |
|----|-------------------------------------------------------------------------------------------------------------------------------------------------------------------------------------------------------------------------------------------------------------------------------------------------------------------------------------------------------------------------------------------------------------------------------------------------------------------------------------------------------------------------------------------|--------------------------------------------------------------|
| 22 | Park T, Park J, Park YG, Lee J. Intraoperative Neurophysiological Monitoring for Spinal Cord Tumor Surgery: Comparison of Motor and Somatosensory Evoked Potentials According to Tumor Types. <i>Ann Rehabil Med</i> . 2017 Aug;41(4):610-620. doi: 10.5535/arm.2017.41.4.610. Epub 2017 Aug 31. PMID: 28971046; PMCID: PMC5608669.                                                                                                                                                                                                       | Does not use multivariable regression to assess risk factors |
| 23 | Rocos B, Strantzas S, Zeller R, Lewis S, Tan T, Lebel D. What is the Optimal Surgical Method for Achieving Correction and Avoiding Neurological Complications in Pediatric High-grade Spondylolisthesis? <i>J Pediatr Orthop</i> . 2021 Mar 1;41(3):e217-e225. doi: 10.1097/BPO.0000000000001707. PMID: 33165266.                                                                                                                                                                                                                         | Does not use multivariable regression to assess risk factors |
| 24 | Sadashivam S, Abraham M, Kesavapisharady K, Nair SN. Long-term outcome and prognostic factors of intramedullary spinal hemangioblastomas. <i>Neurosurg Rev</i> . 2020 Feb;43(1):169-175. doi: 10.1007/s10143-018-1025-2. Epub 2018 Aug 31. PMID: 30171501.                                                                                                                                                                                                                                                                                | Does not use multivariable regression to assess risk factors |
| 25 | Saiwai H, Okada S, Hayashida M, Harimaya K, Matsumoto Y, Kawaguchi KI, Kobayakawa K, Maeda T, Ohta H, Shirasawa K, Tsuchiya K, Terada K, Kaji K, Arizono T, Saito T, Fujiwara M, Iwamoto Y, Nakashima Y. Surgery-related predictable risk factors influencing postoperative clinical outcomes for thoracic myelopathy caused by ossification of the posterior longitudinal ligament: a multicenter retrospective study. <i>J Neurosurg Spine</i> . 2019 Dec 27:1-7. doi: 10.3171/2019.10.SPINE19831. Epub ahead of print. PMID: 31881534. | Does not use multivariable regression to assess risk factors |

|    |                                                                                                                                                                                                                                                                                                                                                                                                                                                  |                                                              |
|----|--------------------------------------------------------------------------------------------------------------------------------------------------------------------------------------------------------------------------------------------------------------------------------------------------------------------------------------------------------------------------------------------------------------------------------------------------|--------------------------------------------------------------|
| 26 | Shlobin NA, Raz E, Shapiro M, Clark JR, Hoffman SC, Shaibani A, Hurley MC, Ansari SA, Jahromi BS, Dahdaleh NS, Potts MB. Spinal neurovascular complications with anterior thoracolumbar spine surgery: a systematic review and review of thoracolumbar vascular anatomy. <i>Neurosurg Focus</i> . 2020 Sep;49(3):E9. doi: 10.3171/2020.6.FOCUS20373. PMID: 32871559.                                                                             | Does not use multivariable regression to assess risk factors |
| 27 | Thuett ED, Padberg AM, Raynor BL, Bridwell KH, Riew KD, Taylor BA, Lenke LG. Increased risk of postoperative neurologic deficit for spinal surgery patients with unobtainable intraoperative evoked potential data. <i>Spine (Phila Pa 1976)</i> . 2005 Sep 15;30(18):2094-103. doi: 10.1097/01.brs.0000178845.61747.6a. PMID: 16166902.                                                                                                         | Does not use multivariable regression to assess risk factors |
| 28 | Toll BJ, Samdani AF, Janjua MB, Gandhi S, Pahys JM, Hwang SW. Perioperative complications and risk factors in neuromuscular scoliosis surgery. <i>J Neurosurg Pediatr</i> . 2018 Aug;22(2):207-213. doi: 10.3171/2018.2.PEDS17724. Epub 2018 May 11. PMID: 29749884.                                                                                                                                                                             | Does not use multivariable regression to assess risk factors |
| 29 | Ushirozako H, Yoshida G, Hasegawa T, Yamato Y, Yasuda T, Banno T, Arima H, Oe S, Yamada T, Ide K, Watanabe Y, Kurita T, Matsuyama Y. Characteristics of false-positive alerts on transcranial motor evoked potential monitoring during pediatric scoliosis and adult spinal deformity surgery: an "anesthetic fade" phenomenon. <i>J Neurosurg Spine</i> . 2019 Nov 22:1-9. doi: 10.3171/2019.9.SPINE19814. Epub ahead of print. PMID: 31756712. | Does not use multivariable regression to assess risk factors |
| 30 | Vitale MG, Moore DW, Matsumoto H, Emerson RG, Booker WA, Gomez JA, Gallo EJ, Hyman JE, Roye DP Jr. Risk factors for spinal cord injury during surgery for spinal                                                                                                                                                                                                                                                                                 | Does not use multivariable regression to assess risk factors |

|    |                                                                                                                                                                                                                                                                                                                                                                                                                             |                                                                                                                       |
|----|-----------------------------------------------------------------------------------------------------------------------------------------------------------------------------------------------------------------------------------------------------------------------------------------------------------------------------------------------------------------------------------------------------------------------------|-----------------------------------------------------------------------------------------------------------------------|
|    | deformity. <i>J Bone Joint Surg Am.</i> 2010 Jan;92(1):64-71. doi: 10.2106/JBJS.H.01839. PMID: 20048097.                                                                                                                                                                                                                                                                                                                    |                                                                                                                       |
| 31 | Watanabe T, Kanayama M, Takahata M, Oda I, Suda K, Abe Y, Okumura J, Hojo Y, Iwasaki N. Perioperative complications of spine surgery in patients 80 years of age or older: a multicenter prospective cohort study. <i>J Neurosurg Spine.</i> 2019 Dec 17:1-9. doi: 10.3171/2019.9.SPINE19754. Epub ahead of print. PMID: 31846935.                                                                                          | Does not use multivariable regression to assess risk factors                                                          |
| 32 | Wilson TJ, Hamrick F, Alzahrani S, Dibble CF, Koduri S, Pendleton C, Saleh S, Ali ZS, Mahan MA, Midha R, Ray WZ, Yang LJS, Zager EL, Spinner RJ. Analysis of the effect of intraoperative neuromonitoring during resection of benign nerve sheath tumors on gross-total resection and neurological complications. <i>J Neurosurg.</i> 2021 Feb 12:1-10. doi: 10.3171/2020.8.JNS202885. Epub ahead of print. PMID: 33578389. | Ineligible study design for Key Question, e.g., case series, modeling (e.g., prediction models, thresholds/ROC, etc.) |
| 33 | Yoo M, Park YG, Cho YE, Lim CH, Chung SY, Kim D, Park J. Intraoperative evoked potentials in patients with ossification of posterior longitudinal ligament. <i>J Clin Monit Comput.</i> 2022 Feb;36(1):247-258. doi: 10.1007/s10877-020-00646-0. Epub 2021 Feb 6. PMID: 33548015.                                                                                                                                           | Does not use multivariable regression to assess risk factors                                                          |
