# Supplementary material for: The 2023 AO Spine-Praxis Guidelines in Acute Spinal Cord Injury: What Have We Learned? What Are the Critical Knowledge Gaps and Barriers to Implementation?
Source: PubMed Central journal article supplement (PMC10964887; doi:10.1177/21925682231196825), 2024-03-25
Supplement: sj-pdf-5-gsj-10.1177_21925682231196825.pdf [file sj-pdf-5-gsj-10.1177_21925682231196825.pdf]

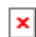

**A Clinical Practice Guideline for Prevention, Diagnosis and Management of Intraoperative Spinal Cord Injury: Recommendations for Use of Intraoperative Neuromonitoring and for the Use of Preoperative and Intraoperative Protocols for Patients Undergoing Spine Surgery**

|                  |                                                                                                                                                                                                                                                                                                                                                                                                                                                                                                                                                                                                                                                                                                                                                                                                                                                                                                                                                                                                                                                                                                                                                                                                                                                                                                                                                                                                                                                                                                                                                                                                                                                                                                                                                                                                                                                                                                          |
|------------------|----------------------------------------------------------------------------------------------------------------------------------------------------------------------------------------------------------------------------------------------------------------------------------------------------------------------------------------------------------------------------------------------------------------------------------------------------------------------------------------------------------------------------------------------------------------------------------------------------------------------------------------------------------------------------------------------------------------------------------------------------------------------------------------------------------------------------------------------------------------------------------------------------------------------------------------------------------------------------------------------------------------------------------------------------------------------------------------------------------------------------------------------------------------------------------------------------------------------------------------------------------------------------------------------------------------------------------------------------------------------------------------------------------------------------------------------------------------------------------------------------------------------------------------------------------------------------------------------------------------------------------------------------------------------------------------------------------------------------------------------------------------------------------------------------------------------------------------------------------------------------------------------------------|
| Journal:         | <i>Global Spine Journal</i>                                                                                                                                                                                                                                                                                                                                                                                                                                                                                                                                                                                                                                                                                                                                                                                                                                                                                                                                                                                                                                                                                                                                                                                                                                                                                                                                                                                                                                                                                                                                                                                                                                                                                                                                                                                                                                                                              |
| Manuscript ID    | Draft                                                                                                                                                                                                                                                                                                                                                                                                                                                                                                                                                                                                                                                                                                                                                                                                                                                                                                                                                                                                                                                                                                                                                                                                                                                                                                                                                                                                                                                                                                                                                                                                                                                                                                                                                                                                                                                                                                    |
| Manuscript Type: | Special Issue- Knowledge Forum SCI Guidelines                                                                                                                                                                                                                                                                                                                                                                                                                                                                                                                                                                                                                                                                                                                                                                                                                                                                                                                                                                                                                                                                                                                                                                                                                                                                                                                                                                                                                                                                                                                                                                                                                                                                                                                                                                                                                                                            |
| Keywords:        | spinal cord injury, neuro, trauma                                                                                                                                                                                                                                                                                                                                                                                                                                                                                                                                                                                                                                                                                                                                                                                                                                                                                                                                                                                                                                                                                                                                                                                                                                                                                                                                                                                                                                                                                                                                                                                                                                                                                                                                                                                                                                                                        |
| Abstract:        | <p>Study Design: Development of a clinical practice guideline following the Grading of Recommendations, Assessment, Development and Evaluation (GRADE) process.</p> <p>Objective: The objectives of this study were to develop guidelines that outline the utility of intraoperative neuromonitoring (IONM) to detect intraoperative spinal cord injury (ISCI) among patients undergoing spine surgery, to define a subset of patients undergoing spine surgery at higher risk for ISCI and to develop protocols to prevent, diagnose, and manage ISCI.</p> <p>Methods: All systematic reviews were done by PRISMA standards and registered on PROSPERO. A multidisciplinary, international Guidelines Development Group (GDG) reviewed and discussed the evidence using GRADE protocols. Consensus was defined by 80% agreement among GDG members. A systematic review and diagnostic test accuracy (DTA) meta-analysis was performed to synthesize pooled evidence on the diagnostic accuracy of IONM to detect ISCI among patients undergoing spinal surgery. The IONM modalities evaluated included somatosensory evoked potentials (SSEP), motor evoked potentials (MEP), electromyography (EMG), and multimodal neuromonitoring. Utilizing this knowledge and their clinical experience, a multidisciplinary guideline development group (GDG) created recommendations for the use of IONM to identify ISCI in patients undergoing spine surgery. The evidence related to existing care pathways to manage ISCI was summarized and based on this a novel AOSpine-PRAXIS care pathway was created.</p> <p>Results: Our recommendations are as follows: 1) We recommend that intraoperative neurophysiological monitoring be employed for high risk patients undergoing spine surgery, and 2) We suggest that patients at "high risk" for ISCI during spine surgery be proactively identified...</p> |

1  
2  
3  
4  
5  
6  
7  
8  
9  
10  
11  
12  
13  
14  
15  
16  
17  
18  
19  
20  
21  
22  
23  
24  
25  
26  
27  
28  
29  
30  
31  
32  
33  
34  
35  
36  
37  
38  
39  
40  
41  
42  
43  
44  
45  
46  
47  
48  
49  
50  
51  
52  
53  
54  
55  
56  
57  
58  
59  
60

## Abstract

**Study Design:** Development of a clinical practice guideline following the Grading of Recommendations, Assessment, Development and Evaluation (GRADE) process.

**Objective:** The objectives of this study were to develop guidelines that outline the utility of intraoperative neuromonitoring (IONM) to detect intraoperative spinal cord injury (ISCI) among patients undergoing spine surgery, to define a subset of patients undergoing spine surgery at higher risk for ISCI and to develop protocols to prevent, diagnose, and manage ISCI.

**Methods:** All systematic reviews were done by PRISMA standards and registered on PROSPERO. A multidisciplinary, international Guidelines Development Group (GDG) reviewed and discussed the evidence using GRADE protocols. Consensus was defined by 80% agreement among GDG members. A systematic review and diagnostic test accuracy (DTA) meta-analysis was performed to synthesize pooled evidence on the diagnostic accuracy of IONM to detect ISCI among patients undergoing spinal surgery. The IONM modalities evaluated included somatosensory evoked potentials (SSEP), motor evoked potentials (MEP), electromyography (EMG), and multimodal neuromonitoring. Utilizing this knowledge and their clinical experience, a multidisciplinary guideline development group (GDG) created recommendations for the use of IONM to identify ISCI in patients undergoing spine surgery. The evidence related to existing care pathways to manage ISCI was summarized and based on this a novel AOSpine-PRAXIS care pathway was created.

**Results:** Our recommendations are as follows: 1) We recommend that intraoperative neurophysiological monitoring be employed for high risk patients undergoing spine surgery, and 2) We suggest that patients at “high risk” for ISCI during spine surgery be proactively identified, that after identification of such patients, multi-disciplinary team discussions be undertaken to manage patients, and that an intraoperative protocol including the use of IONM be implemented. A care pathway for the prevention, diagnosis, and management of ISCI has been developed by the GDG.

**Conclusion:** We anticipate that these guidelines will promote the use of IONM to detect and manage ISCI, and promote the use of preoperative and intraoperative checklists by surgeons and other team members for high risk patients undergoing spine surgery. We welcome teams to implement and evaluate the care pathway created by our GDG.

1  
2  
3 **Key Words:** intraoperative neuromonitoring; somatosensory evoked potential; motor evoked  
4 potential; electromyography; SSEP; MEP; EMG; D-Wave; multimodal; intraoperative spinal cord  
5 injury  
6  
7  
8  
9  
10  
11  
12  
13  
14  
15  
16  
17  
18  
19  
20  
21  
22  
23  
24  
25  
26  
27  
28  
29  
30  
31  
32  
33  
34  
35  
36  
37  
38  
39  
40  
41  
42  
43  
44  
45  
46  
47  
48  
49  
50  
51  
52  
53  
54  
55  
56  
57  
58  
59  
60

For Peer Review

## SUMMARY OF RECOMMENDATIONS

**Recommendation 1:** We recommend that intraoperative neurophysiologic monitoring be employed for high risk patients undergoing spine surgery.

*Quality of Evidence: Low*

*Strength of Recommendation: Strong*

**Recommendation 2:** We suggest that patients at “high risk” for ISCI during spine surgery be proactively identified; that after identification of such patients, multi-disciplinary team discussions be undertaken to manage patients; and that an intraoperative protocol including the use of IONM be implemented.

*Quality of Evidence: Very Low*

*Strength of Recommendation: Weak*

## INTRODUCTION

Intraoperative spinal cord injury (ISCI) is one of the most feared complications of spine surgery and can lead to significant postoperative motor and sensory impairment.<sup>1</sup> In an effort to prevent such complications, intraoperative neurophysiological monitoring (IONM) has been increasingly employed in recent years. IONM enables real-time feedback from specific nerve roots, motor tracts, and sensory tracts to measure spinal cord function intraoperatively. Currently, somatosensory evoked potentials (SSEPs), motor-evoked potentials (MEPs), and spontaneous and prompted electromyography (EMG) are the most frequently used IONM modalities for spinal procedures, either by themselves or in combination (multimodal neuromonitoring).<sup>2</sup> Despite improvements in our understanding of IONM and its application to contemporary spine surgery, there remain considerable disagreements over the efficacy and value of using IONM in routine spine surgery cases.<sup>13-6</sup> There have been previous systematic reviews with and without meta-analyses in the past, which have attempted to summarize the role of neurophysiologic monitoring for ISCI.<sup>3-14</sup> However, these have focused on a specific question (for example “Diagnostic Accuracy of SSEP Changes During Lumbar Spine Surgery for Predicting Postoperative Neurological Deficit” by Chang et al.<sup>8</sup>) or have only included comparisons of one modality versus another (for example “Diagnostic Accuracy of Combined Multimodality Somatosensory Evoked Potential and Transcranial Motor Evoked Potential Intraoperative Monitoring in Patients With Idiopathic Scoliosis” by Thirumala et al.<sup>11</sup>). A comprehensive assessment of diagnostic test accuracy of neuromonitoring following the PRISMA-DTA guidelines and GRADE guidelines has not been performed prior to this effort. These guidelines present a high level of rigor, which enhances the clinical applicability and validity. PRISMA 2020 implementation presents

1  
2  
3 several additional advantages. Readers can evaluate the applicability of the methodologies and,  
4 consequently, the veracity of the conclusions, thanks to comprehensive reporting. Healthcare  
5 professionals and policy makers can assess the relevance of the findings to their environment by  
6 presenting and summarizing the characteristics of the research that contributed to the synthesis. Policy  
7 makers, managers, and other decision makers should be assisted in developing suitable  
8 recommendations for practice or policy by describing the degree of certainty in the body of evidence  
9 supporting an outcome and the consequences of findings. Complete reporting of all PRISMA 2020  
10 elements also makes replication and review updates easier, as well as enables teams to utilize  
11 previously completed work by including systematic reviews in overviews (of systematic reviews) and  
12 guidelines.  
13  
14  
15  
16  
17  
18  
19

20 We developed guidelines using the GRADE approach to provide the highest evidence-based  
21 recommendations for the use of IONM for –in particular for those deemed to be at higher risk for  
22 IOSCI. patients undergoing spine surgery. Based on a synthesis of the literature and a Delphi-based  
23 consensus<sup>15</sup> process among members of the Guidelines Development Group (as outlined elsewhere in  
24 this Focus issue) patients at “higher risk” for ISCI were defined as those undergoing surgery for 1)  
25 complex spine deformity including a rigid thoracic curve with high deformity angular ratio (dAR) 2)  
26 revision congenital spine deformity; 3) spine conditions associated with significant cord compression  
27 and myelopathy; 4) intramedullary spinal cord tumor; 5) unstable spine fractures including those with  
28 bilateral facet dislocation and disc herniation or extension distraction injury with ankylosing  
29 spondylitis; and 6) ossification of the posterior longitudinal ligament (OPLL) associated with severe  
30 cord compression and moderate to severe myelopathy.  
31  
32  
33  
34  
35  
36  
37

38 The systematic reviews and meta-analyses were undertaken using PRISMA standards,<sup>16</sup> were  
39 registered on PROSPERO. This knowledge synthesis was conducted to summarize the evidence for  
40 efficacy of SSEP, MEP, EMG and multimodal monitoring in detecting ISCI. Throughout this process,  
41 we sought to distinguish the specific diagnostic efficacy of neuromonitoring within subgroups of  
42 pathology, including deformity, tumor, and degenerative diseases. In addition, the existing care  
43 pathways and approaches to managed ISCI were reviewed and summarized. Based on this a novel  
44 AOSpine-PRAXIS care pathway for the prevention, diagnosis and management of ISCI was  
45 formulated. The overarching goal of these guidelines is to standardize the use of neuromonitoring and  
46 to encourage surgeons and care teams to employ this technology in an evidence-based manner in the  
47 care of their patients.  
48  
49  
50  
51  
52  
53  
54

## 55 **METHODS**

56 Clinicians from a variety of surgical and nonsurgical specialties comprised the multidisciplinary  
57 guideline development group (GDG). A rigorous conflict of interest process was undertaken for all  
58 members of the GDG, who at the outset were required to reveal any financial and intellectual  
59  
60

1  
2  
3 interests, and to commit to the consensus-based process of GRADE. All potential conflicts were  
4 vetted in advance and discussed openly with the GDG. The GDG undertook the development of the  
5 guidelines with editorial freedom and without any influence from funding sources. To define the  
6 purpose and scope of the guideline and to steer its development, a methodology for guidelines was  
7 developed using the Conference on Guideline Standardization (COGS) checklist.<sup>17,18</sup> On the basis of  
8 acknowledged methodological guidelines, systematic evaluations were carried out to compile the data  
9 supporting the suggestions. The individual evaluations in this focus issue include details about the  
10 precise techniques applied to each topic. The grading recommendations, assessments, development,  
11 and evaluation (GRADE) Working Group's methods were used to gauge the overall quality (strength)  
12 of the evidence supporting important outcomes.<sup>19,20</sup> The GRADE Guideline Development Tool was  
13 used to record the procedure, evaluate the advantages and disadvantages of different choices, and  
14 assess the strength of the recommendation.<sup>21–24</sup> To generate the final recommendations for each of the  
15 issues covered, consensus sessions employing a modified Delphi methodology<sup>15</sup> were held with the  
16 interdisciplinary, multinational GDGs using online video conferencing technology and anonymous  
17 voting. Consensus was defined as 80% agreement. Methodologists from Aggregate Analytics  
18 provided methodological expertise on the guideline formulation process and worked closely with  
19 clinical authors to conduct the systematic reviews. They had no financial or intellectual conflicts of  
20 interest.  
21  
22  
23  
24  
25  
26  
27  
28  
29  
30  
31  
32  
33  
34

## 35 **Clinical Recommendations**

### 36 **Part 1:**

37  
38 *Key Question:* Should we recommend intraoperative neurophysiologic monitoring for patients  
39 undergoing spine surgery deemed to be “high risk”?

40  
41 *Recommendation:* We recommend that intraoperative neurophysiologic monitoring be employed for  
42 high-risk patients

43  
44 *Quality of Evidence:* Low

45  
46 *Strength of Recommendation:* Strong  
47  
48

### 49 **Evidence Summary**

50  
51 A comprehensive systematic review and diagnostic test accuracy (DTA) meta-analysis was performed  
52 to assess the efficacy of neuromonitoring for detecting ISCI, following the PRISMA-DTA guidelines  
53 and GRADE guidelines. This review may be found in another article in this issue and the results are  
54 summarized below.  
55  
56

57  
58 A total of 164 studies consisting of 99,937 patients were included. Of the 164 studies included, 16  
59 (9.75%) were prospective while 148 (90.25%) were retrospective. In terms of disease group in the  
60

1  
2  
3 included studies, most studies included patients with mixed pathology (29.87%, n=49), followed by  
4 deformity (26.83%, n=44), degenerative disc disease (21.95%, n=36), tumors (17.68%, n=29), trauma  
5 (1.83%, n=3), congenital diseases (1.2%, n=2) and arteriovenous malformation (AVM) (0.6%, n=1).  
6 Most studies featured centers/hospitals from United States (35.36%, n=58), followed by Japan  
7 (15.85%, n=26), China (9.1%, n=15), Korea, UK (5.5% each, n=9), Canada, Switzerland (4.9% each,  
8 n=8), followed by others. Most studies consisted of adult patients (50%, n=82), followed by studies  
9 which had both adolescent and adult patients (34.7%, n=57) and adolescents (9.1%, n=15). Ten  
10 studies (6%) did not specify patient age. Of the 164 studies, 52 studies (31.7%) presented data for  
11 SSEP, 75 studies (45.7%) presented data for MEP, 16 studies (9.75%) presented data for EMG, and  
12 69 studies (42.07%) presented data for multimodal neuromonitoring.  
13  
14  
15  
16  
17  
18  
19

20  
21 A total of 52 studies presented data for SSEP, consisting of a total of 18,076 patients. Overall, the  
22 sensitivity of SSEP was found to be 67.5% (95% CI 50.9-80.6, Heterogeneity:  $I^2 = 62\%$ ,  $\tau_2 = 5.9269$ ,  $p$   
23  $< 0.01$ ), while the specificity was found to be 96.8% (95% CI 94.8-98.1, Heterogeneity:  $I^2 = 95\%$ ,  $\tau_2 =$   
24  $3.8246$ ,  $p < 0.01$ ). The  $I^2$  heterogeneity represents the percentage of the total variability in a set of  
25 effect sizes due to true heterogeneity, that is, to between-studies variability. Overall, the Receiver  
26 Operating Characteristics Area Under the Curve (AUC) value was found to be 0.899, while the  
27 Diagnostic Odds Ratio (DOR) was found to be 41.9 (95% CI 24.1-73.1).  
28  
29

30  
31 A total of 75 studies presented data for MEP, consisting of a total of 79,545 patients. Overall, the  
32 sensitivity of MEP was found to be 90% (95% CI 86.1-92.9, Heterogeneity:  $I^2 = 32\%$ ,  $\tau_2 = 1.91$ ,  $p <$   
33  $0.01$ ), while the specificity was found to be 95.6% (95% CI 94-96.7, Heterogeneity:  $I^2 = 97\%$ ,  $\tau_2 = 2.7$ ,  
34  $p < 0.01$ ). Overall, the AUC value was found to be 0.927, while the DOR was found to be 103.25  
35 (95% CI 69.98—152.34).  
36  
37  
38  
39

40  
41 A total of 16 studies presented data for EMG, consisting of 7,004 patients. Overall, the pooled  
42 sensitivity for EMG was found to be 48.3% (95% CI 31.4-65.6, Heterogeneity  $I^2 = 54$ ,  $\tau_2 = 1.27$ ,  
43  $p < 0.01$ ), while the pooled specificity was found to be 92.9% (CI 84.4-96.9, Heterogeneity  $I^2 = 97$ ,  $\tau_2 =$   
44  $3.1$ ,  $p < 0.01$ ). The AUC was found to be 0.773 and the DOR was found to be 11.2 (95% CI 4.84-  
45 25.97).  
46  
47  
48  
49

50  
51 A total of 69 studies with 58,325 patients presented data for any combination of multimodal  
52 neuromonitoring as outlined in detail in the systematic review on this topic in this Focus issue.  
53 Overall, the sensitivity of multimodal neuromonitoring was found to be 91% (95% 86-94.3,  
54 Heterogeneity:  $I^2 = 40\%$ ,  $\tau_2 = 2.4511$ ,  $p < 0.01$ ), while the pooled specificity was found to be 93.8%  
55 (95% 90.6-95.9, Heterogeneity:  $I^2 = 96\%$ ,  $\tau_2 = 3.9819$ ,  $p > 0.99$ ). The AUC value was found to be  
56 0.903 while the DOR was found to be 71.97 (95% 42.17-122.8).  
57  
58  
59  
60



1  
2  
3 We also assessed publication bias for each of the groups. DTA meta-analyses differ from  
4 conventional intervention meta-analysis in several ways, making it more difficult to estimate the  
5 likelihood of publication bias. The Egger's test is a statistical method in typical meta-analysis for  
6 identifying funnel plot asymmetry, i.e. it determines whether there is a stronger correlation between  
7 anticipated intervention effects and a study size than what would be expected to happen by chance.<sup>25</sup>  
8 In order to test the global null hypothesis that "all of the univariate funnel plots for multiple outcomes  
9 are symmetric," Hong et al. (2020) first proposed an expanded version of this test for multivariate  
10 meta-analysis.<sup>26</sup> In comparison to the common univariate publication bias test, this overall test  
11 contains various outcome information, and the statistical power is often increased. The Hong's test  
12 (also known as MSSET) avoids correlation data among various outcomes that is occasionally absent  
13 under certain circumstances of multivariate meta-analysis. However, for DTA meta-analysis, the  
14 Reitsma's bivariate meta-analysis model has all of the correlation data, and since MSSET does not  
15 make use of this data, its statistical power may be wasteful.<sup>27</sup> For the same global null hypothesis,  
16 Noma (2020) created an alternative generalized Egger's tests that successfully take into account the  
17 correlation data (called as MSSET2 and MSSET3). Because Noma's tests make use of correlation  
18 data, it is anticipated that they will have greater statistical power than the MSSET when applied to  
19 DTA meta-analysis.

20  
21 For SSEP neuromonitoring, we observed slight asymmetry and the weighted regression with  
22 multiplicative dispersion test for asymmetry was not found to be statistically significant ( $t= 1.61$ ,  
23  $df=60$ ,  $p=0.11$ ). For MEP neuromonitoring, we observed asymmetry and the weighted regression  
24 with multiplicative dispersion test for asymmetry was found to be statistically significant ( $t= 4.42$ ,  
25  $df=92$ ,  $p<0.001$ ). For multimodal neuromonitoring, we observed asymmetry and the weighted  
26 regression with multiplicative dispersion test for asymmetry was not found to be statistically  
27 significant ( $t= 0.72$ ,  $df=15$ ,  $p=0.48$ ). For multimodal neuromonitoring, we observed asymmetry and  
28 the weighted regression with multiplicative dispersion test for asymmetry was also found to be  
29 statistically significant ( $t= 5.03$ ,  $df=79$ ,  $p<0.001$ ).

30  
31 For SSEP monitoring, of the 52 studies, 10 studies (19.2%) were found to have "some concerns" as  
32 per the risk of bias assessment part of the QUADAS tool, 25% ( $n=13$ ) were found to be "high risk"  
33 and the remaining 29 studies (55.8%) were found to be "low risk". For most of the studies that were  
34 graded down, the particular domain was "reference standard"; the reason was either lack of  
35 specification/details of the postoperative examination used, or use of a non-standard exam. For MEP  
36 monitoring, of the 75 studies, 21 studies (28%) were found to have some concerns, 10.7% ( $n=8$ ) were  
37 found to be high risk and the remaining 46 studies (61.3%) were found to be low risk. For most of the  
38 studies that were graded down, the particular domain was "reference standard". For EMG monitoring,  
39 of the 16 studies, 3 studies (18.75%) were found to have some concerns, 25% ( $n=4$ ) were found to be

1  
2  
3 high risk and the remaining 9 studies (56.25%) were found to be low risk. For most of the studies that  
4 were graded down, the particular domain was “index test”; the reason was lack of specification/details  
5 of the changes in EMG monitoring that were considered an alert.  
6  
7

8  
9 For multimodal neuromonitoring, of the 69 studies, 14 studies (20.3%) were found to have some  
10 concerns, 14 studies (20.3%) were found to be high risk and the remaining 41 studies (59.4%) were  
11 found to be “low risk”. For most of the studies that were graded down, the particular domain was  
12 “index”; the reason was lack of specification/details of the criteria that constituted an alert.  
13 We applied the GRADE assessment methodology pertinent to DTA meta-analysis to evaluate the  
14 strength of evidence for each of the 4 groups, i.e. SSEP, MEP, EMG and multimodal  
15 neuromonitoring. For all 4 groups, the final quality of the evidence was found to be “Low”. Evidence  
16 was downgraded particularly for “Inconsistency”, “Imprecision” and “Publication Bias”. The  
17 inconsistency score was downgraded because of differences in included population/pathology type  
18 (deformity vs tumor vs degenerative vs mixed population) and because of use of different  
19 “thresholds”. “Imprecision” was downgraded due to low number of events (true positives + false  
20 negatives) resulting in large confidence intervals, particularly for sensitivity. Finally, “Publication  
21 Bias” was downgraded due to both observed and statistically significant asymmetry.  
22  
23  
24  
25  
26  
27  
28  
29  
30

### 31 **Rationale for Recommendation**

32  
33 During the consensus meeting held via virtual video-teleconferencing, the GDG reviewed the  
34 evidence and results of the meta-analysis, and then went through the Evidence-to-Decision framework  
35 with anonymous voting to address each of the considerations necessary for making the  
36 recommendation. Consensus was defined as 80% agreement. The GDG agreed (92% Yes and 8%  
37 probably yes) that ISCI is indeed a high priority problem, given that the incidence of new deficit may  
38 be up to 23% for deformity surgery and 61% for tumor surgery.<sup>27</sup> Moreover, ISCI may be associated  
39 with significant morbidity for the patient and their caregivers, and with significant liability burden for  
40 the surgeon and care team.  
41  
42  
43  
44  
45  
46

47 The GDG agreed (100% consensus) that the desirable anticipated effects are large, given that  
48 implementing neuromonitoring has been shown to reduce the risk of injury; that even if injury does  
49 occur, the potential opportunity to reverse or minimize the underlying neurologic deficit is higher, and  
50 that having neuromonitoring alerts can prompt care teams to put treatment algorithms into motion.  
51 The GDG agreed that the undesirable effects of neuromonitoring are small (100% consensus). These  
52 effects include the need for neuromonitoring equipment, availability of  
53 neurophysiologist/technologists for procedures, time to set up the equipment intraoperatively, and a  
54 certain degree of unnecessary disruption due to false alerts.  
55  
56  
57  
58  
59  
60

1  
2  
3 The GDG agreed that the certainty of evidence of the systematic review and meta-analysis is  
4 moderate (83% moderate, 8.5% low, 8.5% high). Based on our DTA meta-analysis, most included  
5 studies in the analyses were low risk as assessed using QUADAS. However, when applying the  
6 GRADE assessment scoring, strength of evidence was downgraded particularly for “Inconsistency”,  
7 “Imprecision” and “Publication Bias”. The inconsistency score was downgraded because of  
8 differences in included population/pathology type (deformity vs tumor vs degenerative vs mixed  
9 population) and because of the use of different “thresholds”. “Imprecision” was downgraded due to  
10 low number of events (true positives + false negatives) resulting in large confidence intervals,  
11 particularly for sensitivity. Finally, “Publication Bias” was downgraded due to both observed and  
12 statistically significant asymmetry.  
13  
14  
15  
16  
17  
18  
19

20 The GDG agreed that there is either no (64%) or possibly no (27%) important uncertainty or  
21 variability in how much all stakeholders value the main outcome, given that reduction of neurologic  
22 injury during spine surgery is important to all stakeholders.  
23  
24

25 The GDG agreed (82%) that the balance between desirable and undesirable effects probably favors  
26 the intervention, given that the risk of injury with no monitoring outweighs the resource/technical  
27 challenges associated with neuromonitoring.  
28  
29  
30

31 Most of the GDG members agreed that resource requirements, i.e. costs associated with  
32 neuromonitoring are moderate (90% moderate, 10% negligible costs or savings). These include the  
33 cost of the required equipment as well as that of neurophysiologist/technician and increased OR times.  
34 The evidence related to the source requirement and costs unfortunately does not exist. The GDG  
35 acknowledged this and identified this as a knowledge gap that future studies should investigate.  
36  
37  
38  
39  
40

41 Most of the GDG members agreed that the cost effectiveness probably favors the intervention (82%  
42 probably favors the intervention, 9% probably favors the comparison and 9% favors the intervention).  
43 According to a study by Sala et al.<sup>28</sup>, IONM may be cost-effective provided the expenditures do not  
44 exceed \$977 per surgery, based on a reported paraplegia rate of 0.1% in young people after scoliosis  
45 surgery and taking lifetime healthcare costs into consideration. However, the authors' analysis model  
46 assumed that IONM completely prevents all injuries (100 percent prevention rate). The potential  
47 indirect costs of erroneous IONM notifications were not taken into account. As many spine surgeons  
48 have experienced the heightened anxiety caused by IONM notifications, it was acknowledged that  
49 erroneous “false positives” certainly can have a negative impact on the case, and not being able to  
50 factor that in quantitatively is a limitation of the current literature.  
51  
52  
53  
54  
55  
56  
57  
58  
59  
60

1  
2  
3 The GDG agreed that if IONM were to be utilized broadly that health inequity will be reduced (100%  
4 consensus), as it is currently only offered in well-resourced regions and high-income countries.  
5  
6 Guidelines and policy change will likely help extend these technologies to low-income countries.  
7  
8

9  
10 The GDG also agreed that a recommendation for monitoring for high-risk patients will probably be  
11 acceptable (100% consensus) to clinicians under the important caveat that appropriate resources are  
12 available. The GDG also agreed that a recommendation for monitoring will reduce risk of ISCI with  
13 some additional cost but significant opportunity for long-term saving/reduced liability. The GDG  
14 agreed that the feasibility of implementing this intervention may vary (82% varies, probably varies  
15 18%) given the challenges in implementing this in low-income countries and that remote centers may  
16 not have access to personnel or the equipment.  
17  
18  
19  
20  
21

### 22 *Recommendation*

23 Based on these explanations, most GDG members (82%) agreed that the desirable consequences  
24 *clearly* outweigh undesirable consequences in most settings and *recommended* that neuromonitoring  
25 should be offered (91%) for “high-risk” patients.  
26  
27  
28  
29

### 30 **Part 2:**

31 *Key Question:* Should we recommend that patients at “high risk” for ISCI during spine surgery be  
32 proactively identified, that after identification of such patients, multi-disciplinary team discussions be  
33 undertaken to manage patients, and that an intraoperative protocol including the use of IONM be  
34 implemented?  
35  
36  
37  
38

39 *Recommendation:* We suggest that patients at “high risk” for ISCI during spine surgery be proactively  
40 identified, that after identification of such patients, multi-disciplinary team discussions be undertaken  
41 to manage patients, and that an intraoperative protocol including the use of IONM be implemented.  
42  
43

44 *Quality of Evidence:* *Very Low*

45 *Strength of Recommendation:* *Weak*  
46  
47  
48

### 49 **Evidence Summary**

50 Evidence considered for this recommendation was derived from the scoping review on the Definition,  
51 Frequency and Risk Factors for ISCI and the scoping review on the Management of ISCI are included  
52 in preceding manuscripts within this Focus Issue. Six studies evaluated the risk of an ISCI, four of  
53 which reported risk factors for neurological deficits in the immediate postoperative period using  
54 changes in ASIA grades (Fehlings 2018,<sup>29–31</sup> Chen 2012,<sup>29–31</sup> Romero-Munoz 2019,<sup>29–31</sup> Zhang 2017<sup>32</sup>)  
55 and one study using a definition of “any new limb, motor, or sensory deficit”(Kim 2021<sup>33</sup>.). **One**  
56  
57  
58  
59  
60

1  
2  
3 **study evaluated the risk for ISCI using a  $\geq 50\%$  drop in SSEP and/or MEP**  
4 **amplitudes (Buckland 2018<sup>34</sup>).** Risk of bias of nonrandomized studies was assessed using  
5 the Quality in Prognosis Studies (QUIPS) tool for studies evaluating risk factors.<sup>35</sup> Based on the risk  
6 of bias assessment, studies were rated as “good”, “fair” or “poor” quality. Evidence for risk factors for  
7 neurological deficits in patients with deformities originate from one good-quality, prospective cohort  
8 (N=265) (Fehlings 2018)<sup>29–31</sup> studying an adult scoliosis patient population, and one fair-quality,  
9 retrospective cohort (N=62) in patients with congenital scoliosis (19%), kyphoscoliosis (74%), and  
10 kyphosis (7%). Another poor-quality retrospective cohort (N=2210) (Buckland 2018)<sup>34</sup> described risk  
11 factors for intra-operative neuromonitoring alerts in adolescent patients with idiopathic scoliosis. For  
12 patients with “mixed” indications, one good-quality, retrospective cohort (N=316) (Chen 2012)<sup>29–31</sup>  
13 reported on patients with spinal degeneration (35%), tumor (23%), trauma (22%), deformity (16%),  
14 and inflammation (4%), while one fair-quality retrospective cohort (N=1282) (Romero-Munoz  
15 2019)<sup>29–31</sup> reported on patients presenting with spinal degeneration (75%), deformity (18%), fractures  
16 (4%), and other rare injuries (4%). Common methodological concerns included retrospective  
17 collection of complications (five of the six studies were retrospective study designs) and unclear or  
18 unknown study attrition. Other less frequent concerns included inadequate description of  
19 inclusion/exclusion criteria, unclear validity and/or reliability of the measurement methods for  
20 prognostic factors and/or confounders.

21  
22 A total of 21 risk factors were explored which were broadly categorized into patient-related  
23 (e.g. demographics and comorbidities), clinical (e.g. preoperative neurological status and presence of  
24 myelopathy), surgical (e.g. number of surgical levels, the use of osteotomies) and radiological risk  
25 factors (e.g. coronal deformity angular ratio, curve magnitude).

26  
27 With regard to patient demographics, older age was found to have increased odds for ISCI in  
28 two studies (Zhang 2017,<sup>32</sup> Fehlings 2018<sup>29–31</sup>) in patient cohorts with spinal deformities (OR=1.53  
29 [95% CI 1.13 - 2.06], p=0.05; and OR=8.27 [95% CI 1.17 - 58.71], p=0.035) and in one study (Chen  
30 2012)<sup>29–31</sup> with a mixed patient population consisting of patients with spinal degeneration, tumors,  
31 trauma, deformity, and inflammation (OR=1.08 [95% CI 1.03 - 1.13], p<0.001). Older age was not  
32 associated with an increased risk of ISCIs in one deformity study (Romero-Munoz 2019)<sup>31</sup> in patients  
33 with congenital scoliosis, kyphoscoliosis, and kyphosis (OR=1.004 [95% CI 0.98 - 1.03], p=0.759)  
34 and in one study (Kim 2021)<sup>33</sup> that focused on patients with degenerative spinal disease (OR=0.97  
35 [95% CI 0.89 - 1.05], p=0.446). Due to inclusion of different age groups and varied methods of age  
36 modeling (i.e. continuous vs. categorical), the magnitude of effect varied across studies reporting an  
37 association. While gender was associated with increased odds of ISCI in one study (Chen 2012)<sup>30</sup> in a  
38 mixed patient population with different underlying spinal pathologies (OR 5.22 [95% CI 1.86 -  
39 14.62], p=0.0002), no association was seen in a smaller study (Kim 2021)<sup>33</sup> in patients with  
40  
41  
42  
43  
44  
45  
46  
47  
48  
49  
50  
51  
52  
53  
54  
55  
56  
57  
58  
59  
60

1  
2  
3 degenerative disease (OR=1.378 [95% CI 0.22 - 5.79], p=0.661). Across two studies (Chen 2012,<sup>30</sup>  
4 Romero-Munoz 2019<sup>31</sup>) in patient populations with mixed spinal pathologies, hypertension was not  
5 consistently associated with increased odds of SCI (OR=15.18 [95% CI 4.5 - 51.17], p<0.001<sup>30</sup>; and  
6 OR=1.47 [95% CI 0.56 - 3.86], p=0.436). Abnormal pulmonary function may increase the odds of  
7 ISCI, (OR=2.1 [95% CI 0.99 - 4.48], p=0.054), (Zhang 2017<sup>32</sup>). Other patient-related factors  
8 (including diabetes, obesity, BMI, presence of depression, Charlson-Comorbidity Index and  
9 dyslipidemia) were shown to not significantly increase a patient's individual risk for an ISCI during  
10 spinal surgery.

11  
12 From a clinical perspective, one study (N=62, Zhang 2017)<sup>32</sup> in patients with congenital scoliosis,  
13 kyphoscoliosis and kyphosis found no association between preoperative AIS and neurological deficits  
14 (OR: NR, p>0.05), while another study (N=316, Chen 2012)<sup>30</sup> in mixed populations which included  
15 spinal degeneration, tumors, trauma, deformity, and inflammation found decreased odds for ISCI in  
16 patients with a better pre-operative AIS grade (OR=0.35 [CI 0.18 - 0.66], p=0.001). One study  
17 (N=196, Kim 2021)<sup>33</sup> found OPLL with combined myelopathy to be associated with increased odds of  
18 neurological deficit (OR=8.24 [CI 1.57 - 43.38], p=0.013).

19  
20 In terms of surgery-related factors, no statistically significant associations were reported between  
21 number of spinal levels operated and rates of ISCIs in patients with scoliosis (Fehlings 2018, N=265;  
22 OR=1.08 [95% CI 0.00 - 1.17], p=0.091)<sup>29-31</sup> and in patients with OPLL (Kim 2021, N= 196;  
23 OR=1.36 ])<sup>33</sup>, but an increasing number of operated segments was associated with significantly higher  
24 odds of SCI in another study that included patients with mixed pathologies (Chen 2012, N=316; OR  
25 3.28 [95% CI 1.55 - 6.92], p=0.002).<sup>30</sup> One study showed that the use of IONM during surgery for  
26 OPLL greatly decreases the risk for ISCIs (Kim 2021, N=196; OR=0.14 [95% CI]<sup>33</sup>. The study by  
27 Fehlings et al<sup>29-31</sup> found a statistically significant increase in odds for postoperative neurological  
28 deficits in adults with scoliosis if patients received lumbar-level osteotomies (OR=3.3, [95% 1.18 -  
29 9.17], p=0.022). These deficits included cauda equina injury, which would be considered a type of  
30 ISCI, and isolated nerve root injuries, which are a distinct entity. However, for ease of analysis, the  
31 overall rate of neurological injury was considered. Similarly, the study by Buckland et al (N=2210)<sup>34</sup>  
32 showed significantly higher rates of intraoperative neuromonitoring alerts in adolescent patients  
33 diagnosed with scoliosis who underwent a Ponte-osteotomy (OR: NR, p<0.001). Interestingly,  
34 performing a three-column osteotomy was not associated with an increased risk for ISCI. Finally, no  
35 significant associations between ISCIs and type of operation (emergency vs. elective for degenerative  
36 disease) and duration of surgery was demonstrated.

37  
38 Only two studies reported on radiographic risk factors for ISCIs. Fehlings et al, (N=265, 2018)<sup>29-31</sup>  
39 found greater odds of postoperative neurological deficits per 1 unit increase of coronal deformity  
40 angular ratio (DAR) in scoliosis patients undergoing deformity correction (OR=1.1 [95% CI 1.01 -  
41 1.19], p=0.037). The DAR measures the acuteness of the curve and is defined as the maximum curve  
42  
43  
44  
45  
46  
47  
48  
49  
50  
51  
52  
53  
54  
55  
56  
57  
58  
59  
60

1  
2  
3 Cobb angle divided by the number of involved vertebral levels.<sup>27</sup> The study by Buckland et al  
4 (N=2,210, 2018)<sup>34</sup> found an association between spinal curve magnitude and IONM alerts in patients  
5 with adolescent scoliosis but did not report an effect estimate.  
6  
7

8  
9 The GDG agreed that the following sub-entities of spinal pathologies are deemed high risk for the  
10 occurrence of an ISCI: i) Rigid thoracic curve with high DAR; ii) Revision surgery for congenital  
11 deformity with significant cord compression and myelopathy; iii) extrinsic lesions with cord  
12 compression and myelopathy; iv) intramedullary tumors; v) unstable fractures, (e.g. bilateral facet  
13 dislocations and disc herniation); vi) extension-distraction type injury in patients with ankylosing  
14 spondylitis; vii) OPLL with severe cord compression and moderate to severe myelopathy. It is  
15 recognized that patients with extrinsic lesions associated with cord compression and myelopathy  
16 represent a broad category that is open to interpretation. The decision as to which patients represent  
17 “high risk” in this category has been left open to clinical judgement and is an area in which further  
18 research will be required.  
19  
20  
21  
22  
23  
24

25 The overall quality of evidence for risk factors for ISCI as assessed per GRADE was low or very low  
26 for most factors across surgical conditions. Increased odds for ISCI varied by underlying pathology  
27 (e.g., deformity). In patients undergoing surgery for spinal deformity, there was moderate evidence of  
28 increased risk for ISCI in patients with older age and increasing coronal deformity angular ratio  
29 (DAR). There was moderate evidence that estimated blood loss and the number of spinal levels  
30 involved were not associated with increased risk of ISCI in the deformity population. There was  
31 moderate evidence that better pre-operative AIS grades were associated with decreased risk of ISCI in  
32 patient cohorts with mixed pathologies.  
33  
34  
35  
36  
37

38 Although there is a paucity of quantitative results and thus evidence on comparative effects and harms  
39 of treatment strategies following an ISCI event, management of intraoperative signal loss and possible  
40 SCI merits a standardized protocol and care pathway to avoid and minimize the risk of postoperative  
41 neurologic deficits. This has been understood as a key knowledge gap and as a result, a number of  
42 studies, including professional organizations (such as the Scoliosis Research Society) have come  
43 together to generate care pathways and treatment algorithms in response to IONM alerts. A summary  
44 of the literature pertaining to treatment protocols and care pathways for ISCI is provided in the  
45 scoping review entitled “The Management of ISCI - A Scoping Review”. Briefly, we identified 16  
46 studies reporting on management methods for ISCI of which 8 were retrospective cohort studies, and  
47 two were publications of consensus meetings held using the Delphi technique. The final six studies  
48 were narrative evaluations with recommendations for intraoperative checklists and IONM alert  
49 handling procedures. Notably, 56% of the studies that were included exclusively examined patients  
50 undergoing surgery for spinal deformities. Most studies emphasized anesthesiologic,  
51  
52  
53  
54  
55  
56  
57  
58  
59  
60

1  
2  
3 neurophysiological/technical, and surgical treatment strategies as intraoperative considerations and  
4 actions taken in the event of an ISCI.  
5

6  
7 Using the information gleaned from our scoping review, we designed a novel care pathway called the  
8 “AO Spine Praxis Care Pathway to Manage Patients at High Risk for Intraoperative Spinal Cord  
9 Neurologic Deterioration” consisting of 5 section: i) initial clinical assessment, ii) preoperative  
10 planning, iii) surgical/anaesthetic planning, iv) intraoperative management and v) postoperative  
11 management. It is important to emphasize that Steps 1, 2, and 3 of the care pathway highlight  
12 preventative steps that can be implemented before the operation to lower the risk of an ISCI  
13 happening. For intraoperative management, the first suggestion is to pause, alert the team, and remove  
14 outside distractions in order to take control of the operating room and force everyone engaged to  
15 prioritize and focus on the problem. Subsequently, to reverse the signal loss, reversible surgical,  
16 neurophysiological and anesthetic factors should be investigated. The care pathway also integrates  
17 key post-operative management strategies , including a monitored step-down or ICU bed, serial  
18 neurological functional examinations, consideration of pharmacological intervention with  
19 methylprednisolone, hemodynamic management with maintenance of mean arterial blood pressure  
20 (MAP) parameters, and the use of post-operative imaging including CT and MRI as clinically  
21 indicated.  
22  
23  
24  
25  
26  
27  
28  
29  
30  
31  
32  
33

### 34 **Rationale for Recommendation**

35  
36 With a reported incidence of ISCI of up to 23% in patients undergoing deformity surgery and up to  
37 61% in patients undergoing surgery for intramedullary spinal cord tumors, the GDG agreed that ISCI  
38 is a priority and that risk factors, planned three-column osteotomies, high coronal DAR's and curve  
39 magnitudes need to be identified and considered in patients undergoing spinal surgery.  
40  
41  
42  
43

44 Similar to the previous question, the GDG agreed (93% consensus) that the desirable anticipated  
45 effects of implementing the use of IONM for high risk spine cases would be large, given that a limited  
46 number of studies have shown that implementation of IONM reduces the risk of injury; and that even  
47 if injury occurs, opportunity to reverse IONM signal loss is higher and that having IONM alerts can  
48 prompt care teams to put treatment algorithms into motion.  
49  
50  
51  
52

53 The GDG voted that undesirable effects of neuromonitoring were small (64%) or trivial (36%). These  
54 effects include the requirement of neuromonitoring equipment, availability of neurophysiologists/  
55 technologists for procedures and the potential of unnecessary disruption due to false positive alerts.  
56 No studies have explored whether identification of risk factors, implementation of multidisciplinary  
57 team assessments and implementation of an intraoperative treatment protocol reduces the risk of ISCI.  
58  
59  
60



1  
2  
3 As a result, the GDG decided that the overall certainty of the evidence of effects is low. Reduction of  
4 neurologic impairment is considered of high importance to all stakeholders and as such the GDG  
5 agreed that there are no important uncertainties or variabilities in how much people value the main  
6 outcome, i.e. risk reduction for postoperative neurological deficits.  
7  
8  
9

10  
11 There was unanimous agreement within the GDG that the balance between desirable and undesirable  
12 effects favors the intervention, since the risk of ISCI without identifying high-risk patients, not  
13 conducting multidisciplinary team discussions and employing intraoperative treatment protocols in  
14 response to an ISCI is thought to outweigh the associated potential costs, availability of resources and  
15 technical challenges.  
16  
17  
18

19  
20 While it is understood that the implementation of IONM and the employment of a neurophysiologist /  
21 technician is associated with costs, there has been uncertainty as to how the costs are subdivided and  
22 to what extent generation and implementation of a checklist contributes to overall resource  
23 requirements. These uncertainties are reflected in the GDG's votes, which included 21% votes for  
24 moderate costs, 7% votes for moderate cost savings while 64% voted that resource requirements vary  
25 and cannot be generalized, and 7% did not know what resources would be required. To the GDG's  
26 knowledge, there have been no published studies to date investigating the financial implications of  
27 using IONM and implementing intraoperative treatment algorithms. Therefore, there was high  
28 agreement (92%) that no studies were available to support an assessment of the resources required to  
29 implement IONM protocols for high-risk spine cases.  
30  
31  
32  
33  
34  
35  
36  
37

38 Increasing evidence and general consensus among experts underscores the importance of spinal cord  
39 monitoring and its potential to detect impending injury in time for corrective measures to be taken,  
40 thereby increasing the likelihood of preventing or limiting a neurological deficit. However,  
41 contemporary data on the benefit of monitoring are limited to Class IV and Class III evidence.  
42 Lifetime costs of postoperative neurological deficits, which, depending on the computational model  
43 (e.g. direct health care costs, loss of wages / benefits) and the degree of injury, can be staggering.<sup>36</sup>  
44 Healthcare costs for patients with neurological deficits secondary to spinal cord lesions mainly  
45 originate from the field of traumatic SCI, with lifetime costs for high cervical quadriplegia (C1-4)  
46 incurred at the age of 25 estimated at 5.1 million USD.<sup>37,38</sup> A theoretical model using a Monte Carlo  
47 simulation concluded that intraoperative monitoring would be cost-saving for spinal surgeries using a  
48 reference case of a 50-year-old with a neurologic complication rate of 5% and a 52.4% prevention rate  
49 given an IONM alert at 94.3% sensitivity and 95% specificity, assuming incomplete motor injury.<sup>39</sup>  
50 However, Class I and II studies are not available to date and are likely not to occur for both medico-  
51 legal and ethical reasons. Given the paucity of evidence, the GDG voted that the cost effectiveness of  
52 the intervention probably favors (69%) and favors (31%) the intervention.  
53  
54  
55  
56  
57  
58  
59  
60

1  
2  
3  
4  
5 Given its associated costs and the need for infrastructure and trained personnel, the use of IONM is  
6 commonly confined to well-resourced, high-income countries. The GDG agreed (86% consensus) that  
7 the implementation of guidelines and policies may set benchmarks which have the potential to  
8 promote low- and middle income countries (LMICs) toward reaching their goals of implementing  
9 IONM and treatment protocols; this would have the end-effect of probably reducing health inequity.  
10 Two-thirds (67%) of the GDG voted that the provision of a recommendation for identifying high risk  
11 patients preoperatively, having multidisciplinary team discussions for such high-risk patients, and  
12 implementing intraoperative protocols will probably be acceptable to key stakeholders (33% voted  
13 yes), if appropriate resources are available. It was discussed that such a recommendation will be  
14 associated with additional cost but may constitute a significant opportunity for long-term saving and  
15 reduced liability. Given the potential challenges related to limited resources (e.g. financial, equipment,  
16 personnel) in remote areas and LMICs, 71% of the GDG voted that the feasibility of such a  
17 recommendation varies, while 7% voted uncertain, 7% probably yes, and 14% yes.

### 26 27 *Recommendation*

28 Given the available literature and based on consensus-based discussions, most GDG members (93%)  
29 agreed that desirable consequences clearly outweigh undesirable consequences in most settings and  
30 recommended that patients at “high risk” for ISCI during spine surgery be proactively identified, that  
31 after identification of such patients, multi-disciplinary team discussions be undertaken to manage  
32 patients, and that an intraoperative protocol including the use of IONM be implemented. It was  
33 recognized that key knowledge gaps exist including validation of what constitutes a “high risk spine  
34 case” and the costs/logistical issues involved in implementing IONM protocols for high-risk spine  
35 case.

### 41 **CONCLUSION**

42 In the current guidelines document, we have recommended that some form of neuromonitoring be  
43 implemented for “high risk” patients undergoing spine surgery. We have suggested that patients at  
44 “high risk” for ISCI during spine surgery be proactively identified, that after identification of such  
45 patients, multi-disciplinary team discussions be undertaken to manage patients, and that an  
46 intraoperative protocol including the use of IONM be implemented. We believe that these guidelines  
47 will influence clinical practice and will also facilitate evidence-based decision making. We  
48 acknowledge that literature is limited for use of intraoperative checklists, and we hope that these  
49 guidelines will result in increase in use of such checklists. We also acknowledge that given that  
50 literature related to cost-effectiveness of use of IONM is limited, global adaptation and  
51 implementation of these guidelines, particularly in resource-poor areas, may be a challenge.

## REFERENCES

1. Ahn H, Fehlings MG. Prevention, identification, and treatment of perioperative spinal cord injury. *Neurosurg Focus*. 2008;25(5):E15.
2. Magit DP, Hilibrand AS, Kirk J, et al. Questionnaire study of neuromonitoring availability and usage for spine surgery. *J Spinal Disord Tech*. 2007;20(4):282-289.
3. Liu Q, Wang Q, Liu H, Wu WKK, Chan MTV. Warning criteria for intraoperative neurophysiologic monitoring. *Curr Opin Anaesthesiol*. 2017;30(5):557-562.
4. Chang R, Reddy RP, Coutinho DV, et al. Diagnostic Accuracy of SSEP Changes During Lumbar Spine Surgery for Predicting Postoperative Neurological Deficit: A Systematic Review and Meta-Analysis. *Spine*. 2021;46(24):E1343-E1352.
5. Reddy RP, Chang R, Coutinho DV, et al. Triggered Electromyography is a Useful Intraoperative Adjunct to Predict Postoperative Neurological Deficit Following Lumbar Pedicle Screw Instrumentation. *Global Spine J*. 2022;12(5):1003-1011.
6. Thirumala PD, Huang J, Brahme IS, et al. Alarm criteria for motor evoked potentials. *Neurol India*. 2017;65(4):708-715.
7. Thirumala PD, Huang J, Thiagarajan K, Cheng H, Balzer J, Crammond DJ. Diagnostic Accuracy of Combined Multimodality Somatosensory Evoked Potential and Transcranial Motor Evoked Potential Intraoperative Monitoring in Patients With Idiopathic Scoliosis. *Spine*. 2016;41(19):E1177-E1184.
8. Rijs K, Klimek M, Scheltens-de Boer M, Biesheuvel K, Harhangi BS. Intraoperative Neuromonitoring in Patients with Intramedullary Spinal Cord Tumor: A Systematic Review, Meta-Analysis, and Case Series. *World Neurosurg*. 2019;125:498-510.e2.
9. Di Martino A, Papalia R, Caldaria A, Torre G, Denaro L, Denaro V. Should evoked potential monitoring be used in degenerative cervical spine surgery? A systematic review. *J Orthop Traumatol*. 2019;20(1):19.
10. Ajiboye RM, Zoller SD, Sharma A, et al. Intraoperative Neuromonitoring for Anterior Cervical Spine Surgery: What Is the Evidence? *Spine*. 2017;42(6):385-393.
11. Holdefer RN, Skinner SA. Motor evoked potential recovery with surgeon interventions and neurologic outcomes: A meta-analysis and structural causal model for spine deformity surgeries. *Clinical Neurophysiology*. 2020;131(7):1556-1566. doi:10.1016/j.clinph.2020.03.024
12. Daniel JW, Botelho RV, Milano JB, et al. Intraoperative Neurophysiological Monitoring in Spine Surgery: A Systematic Review and Meta-Analysis. *Spine*. 2018;43(16):1154-1160.
13. Fehlings MG, Brodke DS, Norvell DC, Dettori JR. The Evidence for Intraoperative Neurophysiological Monitoring in Spine Surgery: Does It Make a Difference? *Spine*. 2010;35(9S):S37.
14. Charalampidis A, Jiang F, Wilson JRF, Badhiwala JH, Brodke DS, Fehlings MG. The Use of Intraoperative Neurophysiological Monitoring in Spine Surgery. *Global Spine J*. 2020;10(1 Suppl):104S - 114S.
15. Dalkey N, Helmer O. An Experimental Application of the DELPHI Method to the Use of Experts. *Manage Sci*. 1963;9(3):458-467.

16. PRISMA. Accessed March 31, 2023. <http://prisma-statement.org/Extensions/DTA?AspxAutoDetectCookieSupport=1>
17. Shiffman RN, Michel G. Toward improved guideline quality: using the COGS statement with GEM. *Stud Health Technol Inform*. 2004;107(Pt 1):159-163.
18. Shiffman RN, Shekelle P, Overhage JM, Slutsky J, Grimshaw J, Deshpande AM. Standardized reporting of clinical practice guidelines: a proposal from the Conference on Guideline Standardization. *Ann Intern Med*. 2003;139(6):493-498.
19. Balshem H, Helfand M, Schünemann HJ, et al. GRADE guidelines: 3. Rating the quality of evidence. *J Clin Epidemiol*. 2011;64(4):401-406.
20. *Methods Guide for Effectiveness and Comparative Effectiveness Reviews*. Agency for Healthcare Research and Quality (US)
21. Andrews J, Guyatt G, Oxman AD, et al. GRADE guidelines: 14. Going from evidence to recommendations: the significance and presentation of recommendations. *Journal of Clinical Epidemiology*. 2013;66(7):719-725. doi:10.1016/j.jclinepi.2012.03.013
22. Andrews JC, Schünemann HJ, Oxman AD, et al. GRADE guidelines: 15. Going from evidence to recommendation—determinants of a recommendation’s direction and strength. *Journal of Clinical Epidemiology*. 2013;66(7):726-735. doi:10.1016/j.jclinepi.2013.02.003
23. Schünemann HJ, Oxman AD, Akl EA, et al. Moving from evidence to developing recommendations in guidelines. *Proc Am Thorac Soc*. 2012;9(5):282-292.
24. Wu JC, Ko CC, Yen YS, et al. Epidemiology of cervical spondylotic myelopathy and its risk of causing spinal cord injury: a national cohort study. *Neurosurg Focus*. 2013;35(1):E10.
25. Egger M, Davey Smith G, Schneider M, Minder C. Bias in meta-analysis detected by a simple, graphical test. *BMJ (Clin. Res. Ed.)* 315, 629--634. Published online 1997.
26. Hong C, Salanti G, Morton SC, et al. Testing small study effects in multivariate meta-analysis. *Biometrics*. 2020;76(4):1240-1250.
27. Reitsma JB, Glas AS, Rutjes AWS, Scholten RJPM, Bossuyt PM, Zwinderman AH. Bivariate analysis of sensitivity and specificity produces informative summary measures in diagnostic reviews. *J Clin Epidemiol*. 2005;58(10):982-990.
28. Sala F, Dvorak J, Faccioli F. Cost effectiveness of multimodal intraoperative monitoring during spine surgery. *Eur Spine J*. 2007;16 Suppl 2(Suppl 2):S229-S231.
29. Fehlings MG, Kato S, Lenke LG, et al. Incidence and risk factors of postoperative neurologic decline after complex adult spinal deformity surgery: results of the Scolio-RISK-1 study. *Spine J*. 2018;18(10):1733-1740.
30. Chen Q, Li F, Wu W. Risk factors of iatrogenic spinal cord injury in spinal surgery: a multicenter retrospective study. *Int J Neurosci*. 2012;122(10):606-610.
31. Romero-Muñoz LM, Segura-Fragoso A, Talavera-Díaz F, Guimbard-Pérez J, Caba-Mora D, Barriga-Martín A. Neurological injury as a complication of spinal surgery: incidence, risk factors, and prognosis. *Spinal Cord*. 2020;58(3):318-323.
32. Zhang BB, Zhang T, Tao HR, et al. Neurological complications of thoracic posterior vertebral column resection for severe congenital spinal deformities. *Eur Spine J*. 2017;26(7):1871-1877.

- 1  
2  
3 33. Kim JE, Kim JS, Yang S, et al. Neurophysiological monitoring during anterior cervical  
4 discectomy and fusion for ossification of the posterior longitudinal ligament. *Clin Neurophysiol*  
5 *Pract.* 2021;6:56-62.  
6  
7 34. Buckland AJ, Moon JY, Betz RR, et al. Ponte Osteotomies Increase the Risk of Neuromonitoring  
8 Alerts in Adolescent Idiopathic Scoliosis Correction Surgery. *Spine* . 2019;44(3):E175-E180.  
9  
10 35. Kang H, Gwak HS, Shin SH, et al. Monitoring rate and predictability of intraoperative  
11 monitoring in patients with intradural extramedullary and epidural metastatic spinal tumors.  
12 *Spinal Cord.* 2017;55(10):906-910.  
13  
14 36. Spinal Cord Injury Statistical Center N. Traumatic Spinal Cord Injury Facts and Figures at a  
15 Glance. , *AL Available online at: https://msksc ....*  
16  
17 37. National Spinal Cord Injury Statistical Center. Spinal cord injury facts and figures at a glance. *J*  
18 *Spinal Cord Med.* 2013;36(1):1-2.  
19  
20 38. Cao Y, Chen Y, DeVivo M. Lifetime Direct Costs After Spinal Cord Injury. *Top Spinal Cord Inj*  
21 *Rehabil.* 2011;16(4):10-16.  
22  
23 39. Ney JP, van der Goes DN, Watanabe JH. Cost-benefit analysis: intraoperative  
24 neurophysiological monitoring in spinal surgeries. *J Clin Neurophysiol.* 2013;30(3):280-286.  
25  
26  
27  
28  
29  
30  
31  
32  
33  
34  
35  
36  
37  
38  
39  
40  
41  
42  
43  
44  
45  
46  
47  
48  
49  
50  
51  
52  
53  
54  
55  
56  
57  
58  
59  
60
